# Supplementary material for: Scoping review of models and frameworks of patient engagement in health services research
Source: PubMed Central journal article supplement — BMJ Open. 2022 Aug 19;12(8):e063507. doi: 10.1136/bmjopen-2022-063507 (PMC9396146; doi:10.1136/bmjopen-2022-063507), 2022-08-19
Supplement: bmjopen-2022-063507.draft_revisions.pdf [file bmjopen-2022-063507.draft_revisions.pdf]

# BMJ Open

BMJ Open is committed to open peer review. As part of this commitment we make the peer review history of every article we publish publicly available.

When an article is published we post the peer reviewers' comments and the authors' responses online. We also post the versions of the paper that were used during peer review. These are the versions that the peer review comments apply to.

The versions of the paper that follow are the versions that were submitted during the peer review process. They are not the versions of record or the final published versions. They should not be cited or distributed as the published version of this manuscript.

BMJ Open is an open access journal and the full, final, typeset and author-corrected version of record of the manuscript is available on our site with no access controls, subscription charges or pay-per-view fees (<http://bmjopen.bmj.com>).

If you have any questions on BMJ Open's open peer review process please email [info.bmjopen@bmj.com](mailto:info.bmjopen@bmj.com)

# BMJ Open

## A scoping review of models and frameworks of patient engagement in health services research

|                               |                                                                                                                                                                                                                                                                                                                                                                                                                                                                                                                                     |
|-------------------------------|-------------------------------------------------------------------------------------------------------------------------------------------------------------------------------------------------------------------------------------------------------------------------------------------------------------------------------------------------------------------------------------------------------------------------------------------------------------------------------------------------------------------------------------|
| Journal:                      | <i>BMJ Open</i>                                                                                                                                                                                                                                                                                                                                                                                                                                                                                                                     |
| Manuscript ID                 | bmjopen-2022-063507                                                                                                                                                                                                                                                                                                                                                                                                                                                                                                                 |
| Article Type:                 | Original research                                                                                                                                                                                                                                                                                                                                                                                                                                                                                                                   |
| Date Submitted by the Author: | 05-Apr-2022                                                                                                                                                                                                                                                                                                                                                                                                                                                                                                                         |
| Complete List of Authors:     | Chudyk, Anna; University of Manitoba Faculty of Health Sciences<br>Horrill, Tara; The University of British Columbia School of Nursing<br>Waldman, Celeste; University of Manitoba<br>Demczuk, Lisa; University of Manitoba Elizabeth Dafoe Library<br>Shimmin, Carolyn; George and Fay Yee Centre for Healthcare Innovation<br>Stoddard, Roger; Horizon Health Network<br>Hickes, Serena; University of Manitoba Children's Hospital Research Institute of Manitoba<br>Schultz, Annette; University of Manitoba College of Nursing |
| Keywords:                     | STATISTICS & RESEARCH METHODS, HEALTH SERVICES ADMINISTRATION & MANAGEMENT, MEDICAL EDUCATION & TRAINING                                                                                                                                                                                                                                                                                                                                                                                                                            |
|                               |                                                                                                                                                                                                                                                                                                                                                                                                                                                                                                                                     |

SCHOLARONE™  
Manuscripts

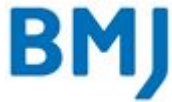

I, the Submitting Author has the right to grant and does grant on behalf of all authors of the Work (as defined in the below author licence), an exclusive licence and/or a non-exclusive licence for contributions from authors who are: i) UK Crown employees; ii) where BMJ has agreed a CC-BY licence shall apply, and/or iii) in accordance with the terms applicable for US Federal Government officers or employees acting as part of their official duties; on a worldwide, perpetual, irrevocable, royalty-free basis to BMJ Publishing Group Ltd ("BMJ") its licensees and where the relevant Journal is co-owned by BMJ to the co-owners of the Journal, to publish the Work in this journal and any other BMJ products and to exploit all rights, as set out in our [licence](#).

The Submitting Author accepts and understands that any supply made under these terms is made by BMJ to the Submitting Author unless you are acting as an employee on behalf of your employer or a postgraduate student of an affiliated institution which is paying any applicable article publishing charge ("APC") for Open Access articles. Where the Submitting Author wishes to make the Work available on an Open Access basis (and intends to pay the relevant APC), the terms of reuse of such Open Access shall be governed by a Creative Commons licence – details of these licences and which [Creative Commons](#) licence will apply to this Work are set out in our licence referred to above.

Other than as permitted in any relevant BMJ Author's Self Archiving Policies, I confirm this Work has not been accepted for publication elsewhere, is not being considered for publication elsewhere and does not duplicate material already published. I confirm all authors consent to publication of this Work and authorise the granting of this licence.

1 A scoping review of models and frameworks of patient engagement in health services research

2  
3 Anna Maria Chudyk<sup>1</sup>, Tara Horrill<sup>2</sup>, Celeste Waldman†, Lisa Demczuk<sup>3</sup>, Carolyn Shimmin<sup>4</sup>,  
4 Roger Stoddard<sup>5</sup>, Serena Hickes<sup>6</sup>, Annette SH Schultz<sup>7</sup>

5  
6 **Author institutional addresses and email addresses:**

7 <sup>1</sup>College of Nursing, Rady Faculty of Health Sciences, University of Manitoba, CR3024 - 369  
8 Tache Avenue, Winnipeg MB, R2H 2A6, Canada. Email: [anna.chudyk@umanitoba.ca](mailto:anna.chudyk@umanitoba.ca)  
9 **(corresponding author).**

10 <sup>2</sup>School of Nursing, University of British Columbia, T201-2211 Westbrook Mall, Vancouver  
11 BC, V6T 2B5. Email: [tara.horrill@ubc.ca](mailto:tara.horrill@ubc.ca)

12 <sup>3</sup>Elizabeth Dafoe Library, University of Manitoba, 25 Chancellor's Circle, Winnipeg Manitoba,  
13 R3T 2N2, Canada. Email: [Lisa.Demczuk@umanitoba.ca](mailto:Lisa.Demczuk@umanitoba.ca)

14 <sup>4</sup>George and Fay Yee Centre for Healthcare Innovation, 3<sup>rd</sup> floor – 753 McDermot Avenue,  
15 Winnipeg Manitoba, R3E 0T6, Canada. Email: [cshimmin@exchange.hsc.mb.ca](mailto:cshimmin@exchange.hsc.mb.ca)

16 <sup>5</sup>Horizon Health Network, 80 Woodbridge Street, Fredericton New Brunswick, E3B 4R3,  
17 Canada. Email: [rogerstodda@gmail.com](mailto:rogerstodda@gmail.com)

18 <sup>6</sup>Translating Emergency Knowledge for Kids (TREKK) Parent Advisory Group, Children's  
19 Hospital Research Institute of Manitoba, 512E - 715 McDermot Avenue, Winnipeg Manitoba,  
20 R3E 3P4, Canada. Winnipeg MB. Email: [shickes@gmail.com](mailto:shickes@gmail.com)

21 <sup>7</sup>College of Nursing, Rady Faculty of Health Sciences, University of Manitoba, CR3022 -  
22 369 Tache Avenue, Winnipeg, Manitoba, R2H 2A6, Canada. Email:  
23 [Annette.Schultz@umanitoba.ca](mailto:Annette.Schultz@umanitoba.ca)

24 †Deceased.

1  
2  
3 **25 Abstract**

4  
5 **26 Objective:** To count and describe the elements that overlap (i.e., present in 2 or more) and  
6  
7  
8 **27** diverge between models and frameworks of patient engagement in health services research. Our  
9  
10 **28** specific research question was, “What are the elements that underlie models and frameworks of  
11  
12 **29** patient engagement in health services research?”

13  
14  
15 **30 Design:** Scoping review.

16  
17  
18 **31 Eligibility criteria:** We included published and unpublished (i.e., grey) literature that presented  
19  
20 **32** (a) models or frameworks (b) of patient engagement (c) in health services research. We excluded  
21  
22 **33** articles unavailable as full-text or not written in English.

23  
24  
25 **34 Data sources:** Using a search strategy co-developed with an academic librarian, published  
26  
27 **35** literature was identified by searching six electronic databases. Searches for unpublished literature  
28  
29 **36** included electronic databases and websites. These searches were supplemented by snowball  
30  
31 **37** sampling.

32  
33  
34  
35 **38 Data extraction and synthesis:** Two independent reviewers extracted data from included  
36  
37 **39** articles using an a-priori developed standardized form. Data were synthesized using both  
38  
39 **40** quantitative (i.e., counts) and qualitative (i.e., mapping) analyses.

40  
41  
42  
43 **41 Results:** We identified a total of 8069 articles and ultimately included 14 models and  
44  
45 **42** frameworks in the review. These models and frameworks were comprised of 18 overlapping and  
46  
47 **43** 57 diverging elements, that were organized into six conceptual categories (i.e., principles,  
48  
49 **44** foundational components, contexts, actions, levels, and outcomes) and spanned intrapersonal,  
50  
51 **45** interpersonal, process, and environment domains.  
52  
53  
54  
55  
56  
57  
58  
59  
60

1  
2  
3 46 **Conclusions:** There is little overlap between the elements that comprise existing models and  
4  
5 47 frameworks of patient engagement in health services research. Those seeking to apply these  
6  
7 48 models and frameworks should consider the “fit” of each element, by conceptual category and  
8  
9 49 domain, within the context of their study.  
10  
11  
12

13 50 **Trial registration:** None.  
14  
15

16 51  
17  
18

19 52 **Keywords**  
20  
21

22 53 Patient and public involvement, stakeholder engagement, patient involvement, patient-oriented  
23  
24 54 research, patient engagement  
25  
26  
27  
28  
29  
30  
31  
32  
33  
34  
35  
36  
37  
38  
39  
40  
41  
42  
43  
44  
45  
46  
47  
48  
49  
50  
51  
52  
53  
54  
55  
56  
57  
58  
59  
60

1  
2  
3 **55 Article Summary**  
4

5 **56 Strengths and limitations of this study**  
6

- 7
- 8 **57**       • The study's methodological strengths included its published protocol and analysis  
9
- 10 **58**       approach, which supported mapping model and framework elements to generate a  
11
- 12 **59**       toolbox of options for researchers to use in their own patient-engaged research.  
13
- 14
- 15 **60**       • Another strength included the involvement of an interdisciplinary research team  
16
- 17 **61**       comprised of content experts, including patient co-researchers.  
18
- 19 **62**       • A weakness of this study concerns the grey boundaries between health services research  
20
- 21 **63**       and other forms of health research.  
22
- 23
- 24 **64**       • Greater engagement of patient co-researchers would have likely resulted in other study  
25
- 26 **65**       insights through more direct contact with the study.  
27  
28  
29  
30  
31  
32  
33  
34  
35  
36  
37  
38  
39  
40  
41  
42  
43  
44  
45  
46  
47  
48  
49  
50  
51  
52  
53  
54  
55  
56  
57  
58  
59  
60

## 66 Introduction

67 Patient engagement in research involves the formation of meaningful and active collaborations  
68 between academic researchers and patients (i.e., an overarching term that refers to individuals  
69 with personal experience of a health issue and informal caregivers) in research governance,  
70 priority setting, conduct, and knowledge translation<sup>1</sup>. Globally, it is also commonly referred to  
71 as patient and public involvement, patient involvement, and stakeholder engagement in research.  
72 This research approach necessitates a shift from the patient's traditional role as a study  
73 participant to that of a research collaborator or partner (i.e., patient co-researcher). This shift in  
74 roles and power dynamics reflects the approach's roots in participatory research<sup>2</sup> and is founded  
75 on the premises that those affected by a problem should be actively involved in the generation of  
76 solutions to it<sup>3</sup>, and individuals' critical reflections on first-hand experiences are essential to  
77 effecting individual and social change<sup>4</sup>. A growing body of evidence supports the benefits of  
78 patient engagement in research, including improved enrollment and decreased attrition rates<sup>5</sup>,  
79 increased relevance of research and accessibility of study materials to study participants<sup>6</sup>,  
80 improved trial design<sup>7</sup>, and increased meaningfulness and understandability of disseminated  
81 findings<sup>5,6</sup>. However, despite its underlying rationale and documented benefits, academic  
82 researchers report hesitance in adopting this research approach<sup>8,9</sup>.

83  
84 Some of the reported challenges of patient engagement in research include uncertainty about the  
85 process (i.e., "how-to" engage patients in research) and the need for a culture shift that supports  
86 these collaborations<sup>8,9</sup>. As there is no standard process for engaging patients in research, this  
87 first challenge is not surprising<sup>5,6,10</sup>. That is, how patient engagement is operationalized may  
88 vary according to the characteristics of a given project (e.g., design, scope, time, and financial



1  
2  
3 89 resources) and patient and academic co-researchers (e.g., personal and professional backgrounds,  
4  
5 90 interests, skills). Further, the underlying cultural shift needed to support patient engagement in  
6  
7 91 research necessitates the redistribution of power and restructuring of traditional research  
8  
9  
10 92 paradigms to support shared planning and decision-making throughout a study <sup>10</sup>. This requires a  
11  
12 93 mutual understanding and vision for what these research collaborations entail. An exploration of  
13  
14 94 the models and frameworks that underlie patient engagement in research may help clarify the  
15  
16 95 processes and support the culture shift necessary for this approach by shedding light on the  
17  
18  
19 96 universal elements that underlie it.  
20

21 97  
22  
23  
24 98 Three previous reviews have broadly synthesized the literature on models, frameworks and/or  
25  
26 99 other systematic approaches to the engagement of patients (and in the case of Jull et al. - other  
27  
28 100 knowledge users) in research <sup>11-13</sup>. Of these, only one described the elements that comprised  
29  
30 101 identified frameworks and best practice guidelines <sup>12</sup>. Perhaps more importantly, none of these  
31  
32  
33 102 reviews focused on health services research, which entails considerations unique to health  
34  
35 103 research. Specifically, health services research focuses on the impact of social factors, financing  
36  
37 104 systems, organizational structures and processes, health technologies, and personal behaviours  
38  
39 105 on health care access, quality and cost, and population health and well-being <sup>14</sup>. This differs  
40  
41  
42 106 substantially from general health research, where the goal of engagement is often to improve  
43  
44 107 clinical outcomes, the effectiveness of a particular intervention, or uptake of research among  
45  
46 108 patients with a specific condition. Engaging patients in health services research may require  
47  
48  
49 109 added considerations related to partnering with a more diverse group of patients with lived  
50  
51 110 experience of different conditions, groups, interventions, and/or interactions with the health care  
52  
53  
54 111 system. Therefore, we set out to contribute to the existing literature on patient engagement in  
55  
56  
57  
58  
59  
60

1  
2  
3 112 research by conducting a knowledge synthesis of models and frameworks of patient engagement  
4  
5 113 in health services research. Specifically, we undertook a scoping review, which is “a type of  
6  
7 114 knowledge synthesis that addresses an exploratory research question aimed at mapping key  
8  
9 115 concepts, types of evidence, and gaps in research related to a defined area or field by  
10  
11 116 systematically searching, selecting, and synthesizing existing knowledge <sup>15</sup>.”  
12  
13  
14  
15 117

## 16 17 118 **Objectives**

18  
19 119 The research question driving our review was, “What are the elements that underlie models and  
20  
21 120 frameworks of patient engagement in health services research?” Our primary objective was to  
22  
23 121 count and describe the elements that overlap (i.e., present in 2 or more models or frameworks)  
24  
25 122 and diverge between identified models and frameworks. This objective intends to support a  
26  
27 123 clearer understanding of similarities in thinking about patient engagement rather than to judge  
28  
29 124 the relevance of elements or prescribe a “one size fits all” approach. Thus, rather than  
30  
31 125 synthesizing the identified elements, we chose to map them according to the categories  
32  
33 126 developed by the original authors and the themes that arose among them, with the vision of  
34  
35 127 presenting a “toolbox” of potential approaches that researchers may choose from for their given  
36  
37 128 research endeavor. Finally, the exploratory nature of our research question and our desire to  
38  
39 129 identify and map key concepts that underlie patient engagement in research led us to adopt a  
40  
41 130 scoping review methodology <sup>16</sup>.  
42  
43  
44  
45  
46

47 131

## 48 49 132 **Methods**

50  
51 133 Our scoping review’s design and conduct followed the methodological framework proposed by  
52  
53 134 Arksey and O’Malley <sup>17</sup> and enhanced by Levac et al. <sup>18</sup>. Its underlying protocol, including  
54  
55  
56  
57  
58  
59  
60

1  
2  
3 135 definitions of underlying key concepts, is published elsewhere<sup>19</sup>. Reporting was guided by the  
4  
5 136 Preferred Reporting Items for Systematic Reviews and Meta-Analysis: Extension for Scoping  
6  
7  
8 137 Review (PRISMA-ScR)<sup>20</sup> and the revised Guidance for Reporting Involvement of Patients and  
9  
10 138 the Public (GRIPP2) short form<sup>21</sup> checklists. Research ethics approval was not required as this  
11  
12 139 study did not involve participants.  
13

14  
15 140  
16  
17 141 **Eligibility criteria:** We included published and unpublished (i.e., grey) literature that presented  
18  
19 142 (i) models or frameworks (ii) of patient engagement (iii) in health services research. Both  
20  
21 143 original and adapted models and frameworks were eligible as long as they were developed in or  
22  
23 144 for health services research. We excluded articles unavailable as full-text due to the limited  
24  
25 145 descriptive information they provide (e.g., context, description of development, underlying  
26  
27 146 elements) and not written in English due to feasibility-related considerations.  
28  
29  
30

31 147  
32  
33 148 **Information sources:** The lead author (A.M.C.) searched six electronic databases (CINAHL,  
34  
35 149 Cochrane Database of Systematic Reviews, Joanna Briggs Institute Evidence Based Practice  
36  
37 150 Database, MEDLine, PsycINFO, and Scopus) and Google Scholar for published literature.  
38  
39 151 Electronic databases (ProQuest Dissertations & Theses and Conference Proceedings Citation  
40  
41 152 Index), Google, and the websites of key agencies (Canadian Institutes of Health Research,  
42  
43 153 INVOLVE, Patient-Centered Outcomes Research Institute) were searched for unpublished  
44  
45 154 literature. These searches were supplemented by snowball sampling, which entailed backwards  
46  
47 155 and forwards reference searches of included articles and contacting experts in patient  
48  
49 156 engagement in research for recommendations about any potentially relevant models or  
50  
51  
52  
53 157 frameworks.  
54  
55  
56  
57  
58  
59  
60

1  
2  
3 158 **Searches:** The search strategy was co-developed by an academic librarian (L.D.) and the lead  
4  
5 159 author (A.M.C.) and finalized through collaboration with the rest of the research team. The  
6  
7 160 search strategy used a combination of search terms related to our underlying concepts (i.e.,  
8  
9 161 “models,” “frameworks,” “patient engagement,” and “health services research”), was adapted to  
10  
11 162 the syntax used by each database and website, and used Boolean terms. The search strategy for  
12  
13 163 MEDLine is found in **Appendix 1**. There were no restrictions on publication dates. Searches of  
14  
15 164 the published and unpublished literature were conducted on July 6, 2021 and July 7, 2021,  
16  
17 165 respectively, while backward and forwards searches ended on January 13, 2022.  
18  
19  
20  
21  
22 166

23  
24 167 **Selection:** Search results for the six electronic databases and Google Scholar were imported into  
25  
26 168 a reference management software (Endnote), and duplicate references were removed. Only the  
27  
28 169 first 10 pages of Google Scholar results (n = 100 citations) were imported as advised by an  
29  
30 170 academic librarian (L.D.). One reviewer (A.M.C.) conducted the level 1 (title) screening. The  
31  
32 171 remaining relevant references were then imported into an online systematic review production  
33  
34 172 and management software (Covidence; Veritas Health Innovation, Melbourne Australia), where  
35  
36 173 two reviewers (A.M.C. and T.H.) independently conducted the level 2 (abstract) and level 3  
37  
38 174 (full-text) screening. Potentially relevant literature identified through websites and snowball  
39  
40 175 sampling was screened for inclusion by both reviewers (A.M.C. and T.H.).  
41  
42  
43  
44

45 176  
46  
47 177 **Data charting process:** A standardized data charting (i.e., extraction) form was developed a  
48  
49 178 priori in Microsoft Word by the study team (**Appendix 2**). Items were chosen that described the  
50  
51 179 eligible models and frameworks, as well as provided context, including how and by who the  
52  
53 180 models were developed. Two reviewers (A.M.C. and T.H.) independently extracted information  
54  
55  
56  
57  
58  
59  
60

1  
2  
3 181 from the final set of included articles using the form. They met with the senior author (A.S) to  
4  
5 182 compare their data after extracting from an initial set of five and ten articles and upon completion  
6  
7 183 of data extraction. Any inconsistencies were resolved through discussion and ultimately referring  
8  
9  
10 184 back to the original article. Further, in two instances<sup>22 23</sup>, the lead author (A.M.C.) contacted the  
11  
12 185 corresponding authors of included frameworks to obtain clarifying information. Consistent with  
13  
14 186 methodological guidelines for scoping reviews, we did not appraise the methodological quality  
15  
16  
17 187 of included articles<sup>15 16</sup>.

18  
19 188  
20  
21 189 **Synthesis of results:** Data were compiled into a single Microsoft Excel (2019) spreadsheet for  
22  
23 190 validation and synthesis, which included both quantitative (i.e., counts) and qualitative (i.e.,  
24  
25 191 mapping) analyses. In conducting the analyses, the lead author (A.M.C) first immersed herself in  
26  
27 192 the included models and frameworks by thoroughly (and repeatedly) reading the associated  
28  
29 193 literature and reviewing graphical representations (when available) along with element  
30  
31 194 definitions. With increased familiarity, the lead author was able to combine and reframe (where  
32  
33 195 appropriate) similar elements found in the original publications. The revised elements were used  
34  
35 196 to obtain counts of overlapping and diverging elements. During this process, it became evident  
36  
37 197 that the elements were organized into similar over-arching conceptual categories by the original  
38  
39 198 authors, and that they could also be located within multiple domains (**Table 1**). As such, in our  
40  
41 199 analysis, we mapped each element according to conceptual category and domain. The validity  
42  
43 200 (i.e., content and face) of the final set of elements was established through discussion with this  
44  
45 201 study's authors. Visual representations of the data (i.e., concept maps) were created using Mind  
46  
47 202 Manager 2020 software, version 20.1 (Corel Corp., Austin, T.X.). To support applicability, some  
48  
49 203 elements within the concept maps contain clarifying examples in brackets.

204 **Table 1. Explanation of over-arching conceptual categories and domains**

| <b>Over-arching conceptual category</b> | <b>Explanation</b>                                                                                                             |
|-----------------------------------------|--------------------------------------------------------------------------------------------------------------------------------|
| Principles                              | Values that orient and rule the conduct of a group                                                                             |
| Foundational components                 | Core elements that comprise patient engagement                                                                                 |
| Contexts                                | Resources or decisions that are external to but inform the engagement process                                                  |
| Actions                                 | Activities (e.g., behaviors, phases, advisory bodies) involved in the actual conduct of the engagement and associated research |
| Outcomes                                | Results of engagement and its associated research                                                                              |
| Organizational levels                   | Different organizational levels at which engagement may occur in a research centre                                             |
| <b>Domain</b>                           | <b>Elements pertain to...</b>                                                                                                  |
| Intrapersonal                           | Individual-level knowledge, perceptions, attitudes, and beliefs                                                                |
| Interpersonal                           | Relationships with other people                                                                                                |
| Process                                 | Carrying out the engagement or broader research                                                                                |
| Environmental                           | Research or organizational policies, cultures, perceptions                                                                     |
| Health systems and outcomes             | Health systems and health outcomes                                                                                             |

205

206 **Patient involvement**

207 We engaged two patient co-researchers (R.S. and S.H.), at the level of involve<sup>24</sup>, in the design  
 208 and conduct of this study. They were involved in development and publication of the scoping

1  
2  
3 209 review protocol <sup>19</sup>, provided feedback on the analyses (including element groupings), provided  
4  
5 210 their perspectives on the interpretation of the study findings, and co-authored this manuscript. In  
6  
7  
8 211 helping shape these stages of the research cycle and related outputs, a notable impact of  
9  
10 212 engagement also included identifying gaps in the current literature relevant to patient partners.  
11  
12 213 The primary methods of engagement were 1-on-1 and small group meetings, as guided by a  
13  
14 214 terms of reference co-developed at the outset of the research partnership. The patient co-  
15  
16 215 researchers will continue to be involved in further knowledge translation activities, like  
17  
18 216 synthesizing the findings for our research group's website  
19  
20  
21 217 ([www.patientengagementinresearch.ca](http://www.patientengagementinresearch.ca)), co-presenting about the engagement process and study  
22  
23 218 findings, and identifying other appropriate methods of dissemination.  
24  
25  
26 219

## 28 220 **Results**

### 31 221 *Flow of models and frameworks into the study*

33 222 **Appendix 3** displays the flow of eligible articles into the review (PRISMA flow chart). Of the  
34  
35 223 10,840 initially identified citations, 2771 duplicates were excluded. After applying inclusion  
36  
37 224 criteria, 7150 articles were excluded at the title screen, 712 at the abstract screen, and 193 at the  
38  
39 225 full-text screen, leaving 13 models and frameworks. One unpublished framework was then  
40  
41 226 identified through snowball sampling, resulting in a total of 14 models and frameworks included  
42  
43 227 in the review.  
44  
45  
46  
47 228

### 49 229 *Characteristics of included articles and models/frameworks*

51 230 Select descriptive characteristics of the included models and frameworks and the articles they  
52  
53 231 were published in (where applicable) are presented in **Appendix 4**. Included articles were  
54  
55  
56  
57  
58  
59  
60

1  
2  
3 232 published between 2012 - 2020 (n = 10 were published in or after 2015) and based in the United  
4  
5 233 States (n = 5), United Kingdom (n = 4), Canada (n = 2), Australia (n = 1) and United Kingdom  
6  
7 234 and Wales (n = 1). The included unpublished framework was developed in Canada as part of the  
8  
9 235 CONNECT project (Caroline Jose, Patricia George-Zwicker, Louise Tardif, Aaron Bouma,  
10  
11 236 Darlene Pugsley, Luke Pugsley, Mathieu Bélanger, Jeffrey Gaudet, Marc Robichaud,  
12  
13 237 CONNECT framework). Models and frameworks were developed in a variety of contexts  
14  
15 238 including organizations (i.e., Patient-Centered Outcomes Research Institute, British Columbia  
16  
17 239 Support Unit, Sunnybrook Hospital, PRIME Centre Wales), medical specialties (i.e., pediatric  
18  
19 240 subspecialty care, palliative care), research disciplines (i.e., healthcare operations research),  
20  
21 241 diseases (i.e., chronic or long-term conditions; cancer; dementia; stroke), and other health  
22  
23 242 conditions (e.g., autistic adults, persons with lived experience of long-term physical and/or  
24  
25 243 mental health illness, parents of children with disabilities). They were developed for general use  
26  
27 244 as well in specific health services research contexts like healthcare operational research, practice-  
28  
29 245 based research and innovation, pragmatic trials, patient-centered outcomes research, and  
30  
31 246 comparative effectiveness research. None targeted a specific component of the research process,  
32  
33 247 and patients were involved in the development of slightly over half (n = 8) of the included  
34  
35 248 models/frameworks. Eight of the models/frameworks took into account the public participation  
36  
37 249 spectrum<sup>24</sup> either explicitly or by including considerations related to control of decision-making  
38  
39 250 and/or directionality of information exchange.  
40  
41  
42  
43  
44  
45  
46  
47  
48

### 49 252 *Overview of the elements of included models and frameworks*

50  
51 253 A total of 112 elements of patient engagement were identified across the 14 included models and  
52  
53 254 frameworks. Combining and reframing similar elements reduced the total number to 75. Among  
54  
55  
56  
57  
58  
59  
60



1  
2  
3 255 these, 18 elements overlapped across the included models and frameworks and 57 diverged (i.e.,  
4  
5 256 were unique to individual models and frameworks). We present the elements by conceptual  
6  
7 257 category and identify the domains they are situated in below. In considering these results, it  
8  
9  
10 258 should be noted that we placed select elements from the models by Deverka et al. <sup>25</sup> (i.e., inputs,  
11  
12 259 methods, outputs) and Evans et al. <sup>26</sup> (i.e., opportunities for engagement, research environment  
13  
14 260 that actively supports engagement and its underlying principles, resources to support  
15  
16  
17 261 engagement, and system to enhance the breadth of patient and carer experience brought to  
18  
19 262 research activities) in the “actions” conceptual category despite that not being what the original  
20  
21 263 authors labeled them. This is due to the fact that although these elements were uncategorized by  
22  
23 264 Deverka et al. <sup>25</sup>, they closely aligned with the actions category, and Evans et al.’s definition of  
24  
25 265 the conceptual category that encompassed these elements closely aligned with other authors’  
26  
27 266 conceptualization of “actions.”  
28  
29  
30  
31 267

### 32 33 268 **Principles**

34  
35 269 Principles represent the values that orient and rule the conduct of a group. They form the ethical  
36  
37 270 backdrop of engagement <sup>27</sup> and underpin effective collaborative involvement in research <sup>26</sup>. For  
38  
39 271 example, communication, which included mutual communication and feedback, was identified  
40  
41 272 as a core principle of patient engagement by Evans et al. <sup>26</sup>. Figure 1 displays the 13 elements in  
42  
43 273 this conceptual category, as reported by two articles <sup>26 27</sup>. These elements were situated in  
44  
45 274 interpersonal (n = 7), process (n = 5), and environment (n = 1) domains.  
46  
47  
48

49 275

50  
51 276

\*Figure 1 about here\*

52  
53 277

1  
2  
3 2784  
5 279 Figure 1. Concept map – principles of patient engagement in health services research6  
7  
8 280 Figure legend: **Coloured**: elements that overlap *within* conceptual categories; **Oval**: elements9  
10 281 that overlap *across* conceptual categories; **Blue**: elements that reside in the interpersonal domain;11  
12 282 **Orange**: elements that reside in the process domain; **Purple**: elements that reside in the13  
14 283 environment domain.15  
16  
17 28418  
19 285 **Foundational components**20  
21 286 Foundational components represent the core elements that comprise patient engagement in health22  
23 287 services research (Figure 2). According to the eight models and frameworks<sup>27-33</sup> represented24  
25 288 here, the 26 underlying elements were primarily situated in the process domain (n = 1426  
27 289 elements), with the remainder situated in intrapersonal (n = 7), interpersonal (n = 3), and28  
29 290 environmental (n = 2) domains.30  
31  
32  
33 29134  
35 292 **\*\*Figure 2 about here\*\***36  
37 293 Figure 2. Concept map – foundational components of patient engagement in health services38  
39 294 research40  
41  
42 295 Figure legend: **Coloured**: elements that overlap *within* conceptual categories; **Oval**: elements43  
44 296 that overlap *across* conceptual categories; **Green**: elements that reside in the intrapersonal45  
46 297 domain; **Blue**: elements that reside in the interpersonal domain; **Orange**: elements that reside in47  
48 298 the process domain; **Purple**: elements that reside in the environment domain.49  
50  
51 29952  
53  
54 300

1  
2  
3 **301 Contexts**  
4

5 **302** This conceptual category identifies elements that relate to resources or decisions that are external  
6  
7  
8 **303** to but inform the engagement process<sup>34</sup>. Figure 3 presents the four elements in this category, as  
9  
10 **304** contributed by one article<sup>34</sup>. Three of the underlying elements resided in the process, and one in  
11  
12 **305** the intrapersonal domains.  
13

14 **306**

15  
16  
17 **307** **\*\*Figure 3 about here\*\***  
18

19 **308** Figure 3. Concept map – contexts of patient engagement in health services research

20  
21 **309** Figure legend: **Oval**: elements that overlap *across* conceptual categories; **Green**: elements that  
22  
23  
24 **310** reside in the intrapersonal domain; **Orange**: elements that reside in the process domain.  
25

26 **311**

27  
28 **312 Actions**  
29

30  
31 **313** The elements within this category pertain to the activities (e.g., behaviors, phases, advisory  
32  
33 **314** bodies) involved in the actual engagement of patients in health services research. Figure 4  
34  
35 **315** presents the elements that comprised this category, as reported by six articles<sup>22 25-27 32 34</sup>. These  
36  
37 **316** elements were primarily (n = 18) situated in the process domain, with one element in each of  
38  
39 **317** intrapersonal and environment domains, and two elements in the interpersonal domain. As  
40  
41 **318** displayed in the top half of elements in the process domain (Figure 4), some of the elements  
42  
43  
44 **319** located here were conceptualized in terms of phases of research (i.e., preparatory, execution,  
45  
46  
47 **320** translational phases and inputs, methods, outputs).  
48

49 **321**

50  
51 **322** **\*\*Figure 4 about here\*\***  
52

53  
54 **323**  
55  
56  
57  
58  
59  
60

1  
2  
3 324 Figure 4. Concept map – actions of patient engagement in health services research

4  
5 325 Figure legend: **Coloured**: elements that overlap *within* conceptual categories; **Oval**: elements  
6  
7 326 that overlap *across* conceptual categories; **Green**: elements that reside in the intrapersonal  
8  
9 327 domain; **Blue**: elements that reside in the interpersonal domain; **Orange**: elements that reside in  
10  
11 328 the process domain; **Purple**: elements that reside in the environment domain.  
12  
13  
14

15 329

### 16 330 **Outcomes**

17  
18  
19 331 Figure 5 presents the elements that comprise the outcomes of patient engagement in health  
20  
21 332 services research, based upon three articles<sup>25 27 34</sup> and the unpublished CONNECT framework.  
22  
23 333 As reflected in the figure, all but the CONNECT framework further organized the elements by  
24  
25 334 time frame (i.e., immediate/near-term, intermediate, and long-term), with three elements (i.e.,  
26  
27 335 health decision-making, research culture, and research outcomes) belonging to two time frames.  
28  
29 336 Overall, this category's elements were primarily situated in the process (n = 11) and health  
30  
31 337 systems and outcomes (n = 8) domains. A further three elements were situated in the  
32  
33 338 intrapersonal, one in the interpersonal, and two in the environment domains.  
34  
35  
36  
37

38 339

39  
40 340 \*\*Figure 5 about here\*\*

41  
42 341 Figure 5. Concept map – outcomes of patient engagement in health services research

43  
44 342 Figure legend: **Coloured**: elements that overlap *within* conceptual categories; **Oval**: elements  
45  
46 343 that overlap *across* conceptual categories; **Green**: elements that reside in the intrapersonal  
47  
48 344 domain; **Blue**: elements that reside in the interpersonal domain; **Orange**: elements that reside in  
49  
50 345 the process domain; **Purple**: elements that reside in the environment domain; **Yellow**: elements  
51  
52 346 that reside in the health system and outcomes domain.  
53  
54  
55  
56  
57  
58  
59  
60

## 347 **Organizational levels**

348 Two articles presented frameworks whose elements captured the organizational levels at which  
349 patient engagement in health services research occurred within research centres<sup>23 35</sup>. As  
350 displayed in Figure 6, these elements were located in environment (n = 3) and process (n = 1)  
351 domains.

352 **\*\*Figure 6 about here\*\***

353 Figure 6. Concept map – organizational levels of patient engagement in health services research  
354 Figure legend: **Coloured**: elements that overlap *within* conceptual categories; **Orange**: elements  
355 that reside in the process domain; **Purple**: elements that reside in the environment domain.

## 357 **Discussion**

### 358 *Statement of principal findings*

359 Our scoping review identified 14 models and frameworks of patient engagement in health  
360 services research, which were comprised of 18 overlapping and 57 diverging elements ( $n_{\text{total}}$   
361 elements = 75). This work represents a novel contribution as, to our knowledge, it is the first to  
362 synthesize the literature on models and frameworks of patient engagement in health services  
363 research. Our approach to data synthesis is also unique in that we attempt to maximize the  
364 intuitiveness and applicability of our findings by presenting elements by overarching conceptual  
365 categories (i.e., principles, foundational components, contexts, actions, levels, and outcomes) and  
366 corresponding domains (i.e., intrapersonal, interpersonal, process, and environment). We  
367 anticipate this approach will facilitate the ready application of our findings to readers' own  
368 research programs by serving as a "toolbox" of elements to consider according to the multi-level  
369 facets of a research team and study. That is, by considering the applicability of elements within

1  
2  
3 370 each conceptual category and domain (as well as other elements that may come to mind based on  
4  
5 371 the groupings' definitions), our findings can serve as a map that allows researchers to pick and  
6  
7  
8 372 choose elements based on their study, resources, research partners, and context.  
9

10 373

11  
12 374 *Strengths and weaknesses of the study*

13  
14 375 Strengths of this study include its scoping review design, which enabled us to gain a broad  
15  
16 376 perspective of the literature on models and frameworks of patient engagement in health services  
17  
18 377 research. Other strengths include (i) a published protocol, (ii) the use of an established  
19  
20 378 methodological framework to guide its design and conduct, (iii) the involvement of an  
21  
22 379 interdisciplinary research team that included patient co-researchers with lived experience of  
23  
24 380 engaging in health services research and other researchers with content expertise in health  
25  
26 381 services research and participatory approaches (including patient engagement in research), and  
27  
28 382 (iv) and the co-design of the search strategy with an academic librarian (LD) and the rest of the  
29  
30 383 research team. A weakness of this study concerns the grey boundaries between health services  
31  
32 384 research and other forms of health research, which may have resulted in the inclusion or  
33  
34 385 exclusion of models or frameworks that others could argue do/do not belong in this review. We  
35  
36 386 attempted to minimize this possibility through a screening process that utilized two reviewers  
37  
38 387 (with a third to resolve discrepancies), an a priori agreed upon definition of health services  
39  
40 388 research, and reaching out to study authors for clarification when necessary. Further, the  
41  
42 389 engagement of patient co-researchers in our scoping review at the level of involve limited their  
43  
44 390 opportunities to formally provide insights and expertise to pre-determined study milestones.  
45  
46 391 Engagement at the level of collaborate or empower may have resulted in other insights through  
47  
48 392 more direct contact with the study.  
49  
50  
51  
52  
53  
54  
55  
56  
57  
58  
59  
60

1  
2  
3 393 *Comparison to other studies*  
4

5 394 Previous reviews of models, frameworks, and/or other systematic approaches to the engagement  
6  
7 395 of patients and other knowledge users in research had a broader scope <sup>11-13</sup> (albeit only one  
8  
9 396 involved a comprehensive search of multiple databases <sup>11</sup>) and different levels of analyses.

10 397 Specifically, rather than report underlying elements, Greenhalgh et al. developed a taxonomy for  
11  
12 398 the classification of identified systematic approaches (i.e., tools, frameworks, benchmarks,  
13  
14 399 guidelines, and critical appraisal checklists) based on their primary focus and intended purpose  
15  
16 400 (i.e., power-focused, priority-setting, study-focused, report-focused, partnership-focused) <sup>11</sup>.

17 401 Innovatively, they piloted co-design workshops that aimed to improve the aesthetic appeal and  
18  
19 402 usability of “best in-class” resources identified through the review. Similar to our questioning of  
20  
21 403 the appropriateness of a “one-size fits all” framework, preliminary findings from their co-design  
22  
23 404 workshops indicated that although stakeholders were presented with a common set of resources,  
24  
25 405 they generated widely differing frameworks suited to meet their different needs and purposes.

26 406 The review by Jull et al. reported 15 high-level concepts for knowledge user engagement in  
27  
28 407 research that they identified through a directed content analysis of underlying elements <sup>13</sup>.

29 408 Although they organized these concepts across four general research phases (i.e., prepare, plan,  
30  
31 409 conduct, apply), they concluded that variation in the reported concepts between frameworks  
32  
33 410 indicated that research teams should consider the concepts as fluid rather than strictly required.

34 411 Lastly, the findings of Harrison et al.’s narrative review of frameworks and guidelines  
35  
36 412 culminated in the proposal of an overarching framework that (similar in principle to our scoping  
37  
38 413 review) conceptualized three distinct but inter-related elements of the patient engagement in  
39  
40 414 research process - engagement foundational principles (i.e., domains that original study authors  
41  
42 415 “... considered foundational to patient engagement in research;” n = 15 elements), engagement  
43  
44  
45  
46  
47  
48  
49  
50  
51  
52  
53  
54  
55  
56  
57  
58  
59  
60

1  
2  
3 416 best practices (i.e., best practice activities to support engagement; n = 25 elements), and research  
4  
5 417 phases where engagement should occur (n = 3 elements) <sup>12</sup>.  
6  
7

8 418

9  
10 419 *The meaning of the study*

11  
12 420 Our findings indicate that the conceptualization of patient engagement in health services research  
13  
14 421 varies between existing models and frameworks. Although models and frameworks posit to  
15  
16 422 break down a concept into its base components (which implies the existence of convergence  
17  
18 423 among underlying elements), this finding is not surprising as patient engagement is an *approach*  
19  
20 424 to research rather than a *method*. Contributing to the heterogeneity among identified elements is  
21  
22 425 the diversity in the populations, contexts, and approaches used to develop the models and  
23  
24 426 frameworks, which also emphasizes the importance of avoiding a “one size fits all” approach to  
25  
26 427 engagement. Perhaps congruence between models and frameworks actually exists at the level of  
27  
28 428 conceptual categories. These could be taken to represent the essential components of patient  
29  
30 429 engagement in health services research. The elements that underlie them, as identified across the  
31  
32 430 various models and frameworks, would then serve as considerations for researchers and patient  
33  
34 431 co-researchers when planning and operationalizing patient engagement in health services  
35  
36 432 research. For this to be better developed from the current literature, consensus is needed on the  
37  
38 433 definitions of the underlying categories, followed by some re-shuffling of the elements across the  
39  
40 434 conceptual categories in order to align with the agreed upon definitions.  
41  
42  
43  
44  
45  
46

47 435

48  
49 436 *Unanswered questions and future research.*

50  
51 437 In sum, our study found that there is little overlap between the elements that comprise existing  
52  
53 438 models and frameworks of patient engagement in health services research. Readers seeking to  
54  
55  
56  
57  
58  
59  
60



1  
2  
3 439 apply our findings to their own engaged work should consider the “fit” of each element, by  
4  
5 440 conceptual category and domain, within the context of their study. Future research that builds  
6  
7 441 upon our work should consider addressing three major gaps. First, most existing models and  
8  
9 442 frameworks identified perceived deficits within patient co-researchers, with a lot less  
10  
11 443 consideration paid to deficits that exist within academic co-researchers. This may be in large part  
12  
13 444 due to the fact the majority of the models were written from an academic researcher lens (as  
14  
15 445 evidenced, for example, by the fact that only a third of the included models and frameworks  
16  
17 446 stated that they involved patients in their development). Second, there is a lack of focus on the  
18  
19 447 “soft skills” that underlie interpersonal interactions and relationships (e.g., body language,  
20  
21 448 wording, tone), as well as intrapersonal-level elements of patient engagement in health services  
22  
23 449 research (e.g., attitudes, values, expectations). Third, patient co-researchers are not just  
24  
25 450 “patients” that can be lumped into a single homogenous category. They are people with different  
26  
27 451 backgrounds, skills, and interests extending beyond their health conditions or needs. Thus, it is  
28  
29 452 important to incorporate a trauma-informed and intersectional approach that acknowledges and  
30  
31 453 promotes an understanding of human beings as shaped by the interactions of different social  
32  
33 454 locations and experiences<sup>36</sup>. Relatedly, it is important for patient co-researchers and academic  
34  
35 455 researchers to get to know each other as people, instead of making assumptions (including about  
36  
37 456 a patient co-researcher’s experience with healthcare services). Engagement is as much about  
38  
39 457 relational interactions as it is research processes. Careful attention needs to be paid to both for  
40  
41 458 academic-patient co-researcher relationships to thrive.  
42  
43  
44  
45  
46  
47  
48

49 459  
50  
51 460 **Funding statement:** This work was supported by a grant from the University Collaborative  
52  
53 461 Research Program (University of Manitoba), grant number 50664. The patient engagement  
54  
55  
56  
57  
58  
59  
60

1  
2  
3 462 activities were supported by the George and Fay Yee Centre for Health Innovation (CHI) Patient  
4  
5 463 and Public Engagement Award (CHI), grant number 49876. Dr. Chudyk's postdoctoral  
6  
7 464 fellowship is supported by the Canadian Institute of Health Research's Patient-Oriented  
8  
9  
10 465 Research Awards - Transition to Leadership Stream award, grant number 170670. The research  
11  
12 466 team had full autonomy in all aspects of the study.  
13  
14  
15 467

16  
17 468 **Competing interests statement:** None declared.  
18  
19 469

20  
21 470 **Author Contributions:** A.M.C and A.S. were responsible for all major areas of concept  
22  
23 471 development, study planning, and manuscript writing. In addition, A.M.C. was also responsible  
24  
25 472 for data collection and analysis. T.H., L.D., C.S., R.S., and S.H. were responsible for all major  
26  
27 473 areas of concept development and study planning, were consulted on the data analysis and its  
28  
29 474 interpretation, and provided manuscript edits. In addition, T.H. was responsible for data  
30  
31 475 collection. C.W. led concept development but passed away prior to the completion of the  
32  
33 476 manuscript.  
34  
35  
36  
37  
38 477

39  
40 478 **Data sharing statement:** Data are available upon reasonable request to the corresponding author  
41  
42 479 (<https://orcid.org/0000-0001-8476-2093>)  
43  
44

45 480

46  
47 481 **Ethics statements**

48  
49 482 **Patient consent for publication:** Not applicable.  
50

51 483 **Ethics approval:** This paper synthesized publicly available articles and therefore did not require  
52  
53 484 ethical approval.  
54  
55  
56  
57  
58  
59  
60

1  
2  
3 485 **Word count:** 4000  
4

5 486  
6

7  
8 487 **Exclusive license statement:** I, the Submitting Author have the right to grant and do grant on  
9  
10 488 behalf of all authors of the Work (as defined in the below author licence), an exclusive licence  
11  
12 489 and/or a non-exclusive licence for contributions from authors who are: i) UK Crown employees;  
13  
14 490 ii) where BMJ has agreed a CC-BY licence shall apply, and/or iii) in accordance with the terms  
15  
16 491 applicable for US Federal Government officers or employees acting as part of their official  
17  
18 492 duties; on a worldwide, perpetual, irrevocable, royalty-free basis to BMJ Publishing Group Ltd  
19  
20 493 (“BMJ”) its licensees and where the relevant Journal is co-owned by BMJ to the co-owners of  
21  
22 494 the Journal, to publish the Work in BMJ Open and any other BMJ products and to exploit all  
23  
24 495 rights, as set out in our licence.  
25  
26  
27

28 496  
29

30  
31 497 I, the Submitting Author, accept and understand that any supply made under these terms is made  
32  
33 498 by BMJ to the Submitting Author unless I am acting as an employee on behalf of my employer  
34  
35 499 or a postgraduate student of an affiliated institution which is paying any applicable article  
36  
37 500 publishing charge (“APC”) for Open Access articles. Where the Submitting Author wishes to  
38  
39 501 make the Work available on an Open Access basis (and intends to pay the relevant APC), the  
40  
41 502 terms of reuse of such Open Access shall be governed by a Creative Commons licence – details  
42  
43 503 of these licences and which Creative Commons licence will apply to this Work are set out in our  
44  
45 504 licence referred to above.  
46  
47  
48  
49  
50  
51  
52  
53  
54  
55  
56  
57  
58  
59  
60

506 **References**

- 507 1. Strategy for Patient-Oriented Research - Patient Engagement Framework; 2014.
- 508 2. Allen ML, Salsberg J, Knot M, et al. Engaging with communities, engaging with patients:  
509 amendment to the NAPCRG 1998 Policy Statement on Responsible Research With  
510 Communities. *Fam Pract* 2017;34(3):313-21. doi: 10.1093/fampra/cmw074 [published  
511 Online First: 2016/08/21]
- 512 3. Lewin K. Frontiers in group dynamics: II. Channels of group life; social planning and action  
513 research. *Human relations* 1947;1(2):143-53.
- 514 4. Freire P. *Pedagogy of the oppressed*, New York (Herder & Herder) 1970. 1970
- 515 5. Domecq JP, Prutsky G, Elraiyah T, et al. Patient engagement in research: a systematic review.  
516 *BMC Health Serv Res* 2014;14:89. doi: 10.1186/1472-6963-14-89 [published Online  
517 First: 2014/02/27]
- 518 6. Manafo E, Petermann L, Mason-Lai P, et al. Patient engagement in Canada: a scoping review  
519 of the 'how' and 'what' of patient engagement in health research. *Health Res Policy Syst*  
520 2018;16(1):5. doi: 10.1186/s12961-018-0282-4 [published Online First: 2018/02/09]
- 521 7. Boote J, Baird W, Beecroft C. Public involvement at the design stage of primary health  
522 research: a narrative review of case examples. *Health Policy* 2010;95(1):10-23. doi:  
523 10.1016/j.healthpol.2009.11.007
- 524 8. Carroll SL, Embuldeniya G, Abelson J, et al. Questioning patient engagement: research  
525 scientists' perceptions of the challenges of patient engagement in a cardiovascular  
526 research network. *Patient Prefer Adherence* 2017;11:1573-83. doi:  
527 10.2147/PPA.S135457

- 1  
2  
3 528 9. Crockett LK, Shimmin C, Wittmeier K, et al. Engaging patients and the public in Health  
4  
5 529 Research: experiences, perceptions and training needs among Manitoba health  
6  
7  
8 530 researchers. *Res Involv Engagem* 2019;5:28. doi: 10.1186/s40900-019-0162-2 [published  
9  
10 531 Online First: 2019/10/15]  
11  
12 532 10. Van der Riet M, Boettiger M. Shifting research dynamics: Addressing power and maximising  
13  
14 533 participation through participatory research techniques in participatory research. *South*  
15  
16 534 *African Journal of Psychology* 2009;39(1):1-18.  
17  
18  
19 535 11. Greenhalgh T, Hinton L, Finlay T, et al. Frameworks for supporting patient and public  
20  
21 536 involvement in research: Systematic review and co-design pilot. *Health Expect*  
22  
23 537 2019;22(4):785-801. doi: 10.1111/hex.12888 [published Online First: 2019/04/24]  
24  
25  
26 538 12. Harrison JD, Auerbach AD, Anderson W, et al. Patient stakeholder engagement in research:  
27  
28 539 A narrative review to describe foundational principles and best practice activities. *Health*  
29  
30 540 *Expect* 2019;22(3):307-16. doi: 10.1111/hex.12873 [published Online First: 2019/02/15]  
31  
32  
33 541 13. Jull JE, Davidson L, Dungan R, et al. A review and synthesis of frameworks for engagement  
34  
35 542 in health research to identify concepts of knowledge user engagement. *BMC Med Res*  
36  
37 543 *Methodol* 2019;19(1):211. doi: 10.1186/s12874-019-0838-1 [published Online First:  
38  
39 544 2019/11/23]  
40  
41  
42 545 14. Canadian Institutes of Health Services Research. Ethical Considerations About Health  
43  
44 546 Research [Available from: <http://www.cihr-irsc.gc.ca/e/48801.html> accessed August 5,  
45  
46 547 2021.  
47  
48  
49 548 15. Colquhoun HL, Levac D, O'Brien KK, et al. Scoping reviews: time for clarity in definition,  
50  
51 549 methods, and reporting. *Journal of Clinical Epidemiology* 2014;67:1291-94. doi:  
52  
53 550 10.1016/j.jclinepi.2014.03.013  
54  
55  
56  
57  
58  
59  
60

- 1  
2  
3 551 16. Munn Z, Peters MD, Stern C, et al. Systematic review or scoping review? Guidance for  
4  
5 552 authors when choosing between a systematic or scoping review approach. *BMC medical*  
6  
7 553 *research methodology* 2018;18(1):143.
- 8  
9  
10 554 17. Arksey H, O'Malley L. Scoping studies: towards a methodological framework. *International*  
11  
12 555 *Journal of Social Research Methodology* 2005;8:19-32. doi:  
13  
14 556 10.1080/1364557032000119616
- 15  
16  
17 557 18. Levac D, Colquhoun H, O'Brien KK. Scoping studies: advancing the methodology.  
18  
19 558 *Implementation Science* 2010;5:69. doi: 10.1186/1748-5908-5-69
- 20  
21  
22 559 19. Chudyk AM, Waldman C, Horrill T, et al. Models and frameworks of patient engagement in  
23  
24 560 health services research: a scoping review protocol. *Research involvement and*  
25  
26 561 *engagement* 2018;4(1):28.
- 27  
28 562 20. Tricco AC, Lillie E, Zarin W, et al. PRISMA extension for scoping reviews (PRISMA-ScR):  
29  
30 563 checklist and explanation. *Annals of internal medicine* 2018;169(7):467-73.
- 31  
32  
33 564 21. Staniszewska S, Brett J, Simera I, et al. GRIPP2 reporting checklists: tools to improve  
34  
35 565 reporting of patient and public involvement in research. *BMJ* 2017;358:j3453. doi:  
36  
37 566 10.1136/bmj.j3453 [published Online First: 2017/08/05]
- 38  
39  
40 567 22. Holmes BJ, Bryan S, Ho K, et al. Engaging patients as partners in health research: Lessons  
41  
42 568 from BC, Canada. *Healthcare Management Forum* 2018;31(2):41-44. doi:  
43  
44 569 10.1177/0840470417741712
- 45  
46  
47 570 23. Evans BA, Gallanders J, Griffiths L, et al. Public involvement and engagement in primary  
48  
49 571 and emergency care research: the story from PRIME Centre Wales. *International Journal*  
50  
51 572 *of Population Data Science* 2020;5(3)

- 1  
2  
3 573 24. IAP2 International Federation for Public Participation. Public Participation Spectrum. *IAP2*  
4  
5 574 *Public Participation Spectrum* 2014:1.  
6  
7  
8 575 25. Deverka PA, Lavalley DC, Desai PJ, et al. Stakeholder participation in comparative  
9  
10 576 effectiveness research: defining a framework for effective engagement. *Journal of*  
11  
12 577 *comparative effectiveness research* 2012;1(2):181-94.  
13  
14  
15 578 26. Evans BA, Porter A, Snooks H, et al. A co-produced method to involve service users in  
16  
17 579 research: the SUCCESS model. *BMC medical research methodology* 2019;19(1):34.  
18  
19 580 27. Frank L, Forsythe L, Ellis L, et al. Conceptual and practical foundations of patient  
20  
21 581 engagement in research at the patient-centered outcomes research institute. *Quality of*  
22  
23 582 *Life Research* 2015;24(5):1033-41.  
24  
25  
26 583 28. Daveson BA, de Wolf-Linder S, Witt J, et al. Results of a transparent expert consultation on  
27  
28 584 patient and public involvement in palliative care research. *Palliative medicine*  
29  
30 585 2015;29(10):939-49.  
31  
32  
33 586 29. Gesell SB, Klein KP, Halladay J, et al. Methods guiding stakeholder engagement in planning  
34  
35 587 a pragmatic study on changing stroke systems of care. *Journal of clinical and*  
36  
37 588 *translational science* 2017;1(2):121-28.  
38  
39  
40 589 30. Gibson A, Welsman J, Britten N. Evaluating patient and public involvement in health  
41  
42 590 research: from theoretical model to practical workshop. *Health Expectations*  
43  
44 591 2017;20(5):826-35.  
45  
46  
47 592 31. Pearson M, Monks T, Gibson A, et al. Involving patients and the public in healthcare  
48  
49 593 operational research—The challenges and opportunities. *Operations Research for Health*  
50  
51 594 *Care* 2013;2(4):86-89.  
52  
53  
54  
55  
56  
57  
58  
59  
60

- 1  
2  
3 595 32. Shippee ND, Domecq Garces JP, Prutsky Lopez GJ, et al. Patient and service user  
4  
5 596 engagement in research: a systematic review and synthesized framework. *Health*  
6  
7 597 *Expectations* 2015;18(5):1151-66.
- 8  
9  
10 598 33. Goeman DP, Corlis M, Swaffer K, et al. Partnering with people with dementia and their care  
11  
12 599 partners, aged care service experts, policymakers and academics: A co-design process.  
13  
14 600 *Australasian journal on ageing* 2019;38:53-58.
- 15  
16  
17 601 34. Ray KN, Miller E. Strengthening stakeholder-engaged research and research on stakeholder  
18  
19 602 engagement. *Journal of comparative effectiveness research* 2017;6(4):375-89.
- 20  
21  
22 603 35. Ruco A, Nichol K. Patient engagement in research and innovation: a new framework.  
23  
24 604 *Journal of medical imaging and radiation sciences* 2016;47(4):290-93.
- 25  
26 605 36. Shimmin C, Wittmeier KDM, Lavoie JG, et al. Moving towards a more inclusive patient and  
27  
28 606 public involvement in health research paradigm: the incorporation of a trauma-informed  
29  
30 607 intersectional analysis. *BMC Health Services Research* 2017;17(1):539. doi:  
31  
32 608 10.1186/s12913-017-2463-1

33  
34  
35 609  
36  
37  
38  
39  
40  
41  
42  
43  
44  
45  
46  
47  
48  
49  
50  
51  
52  
53  
54  
55  
56  
57  
58  
59  
60



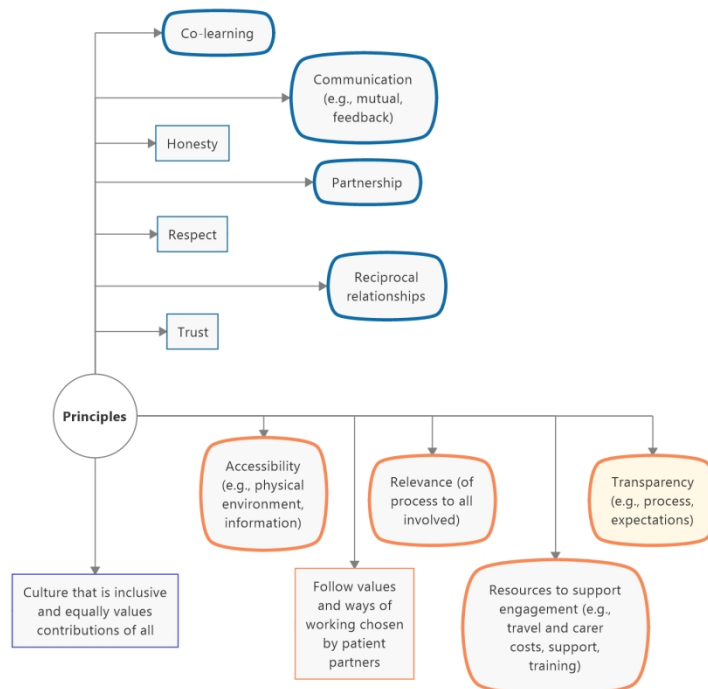

Figure 1. Concept map – principles of patient engagement in health services research  
 Figure legend: Coloured: elements that overlap within conceptual categories; Oval: elements that overlap across conceptual categories; Blue: elements that reside in the interpersonal domain; Orange: elements that reside in the process domain; Purple: elements that reside in the environment domain.

430x322mm (118 x 118 DPI)

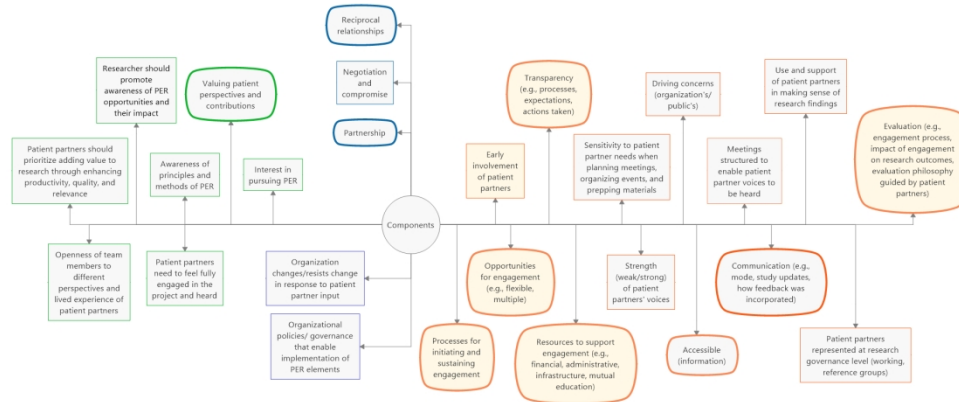

Figure 2. Concept map – foundational components of patient engagement in health services research  
 Figure legend: Coloured: elements that overlap within conceptual categories; Oval: elements that overlap across conceptual categories; Green: elements that reside in the intrapersonal domain; Blue: elements that reside in the interpersonal domain; Orange: elements that reside in the process domain; Purple: elements that reside in the environment domain.

430x322mm (118 x 118 DPI)

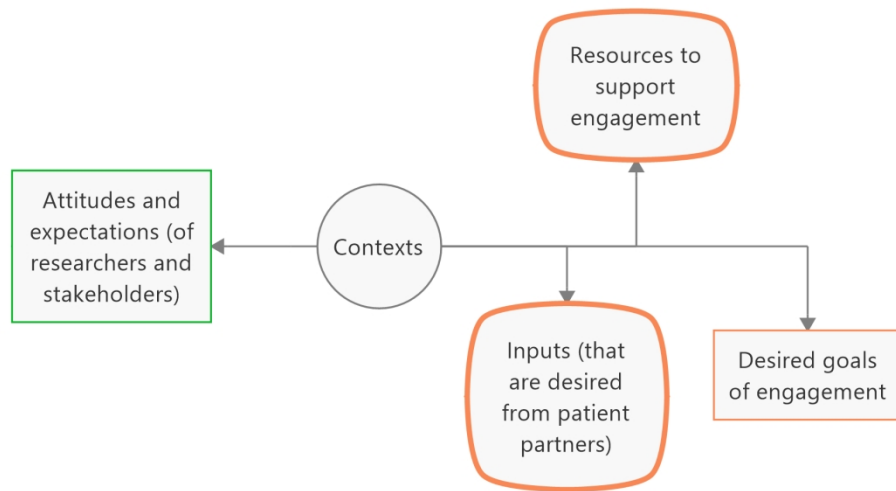

Figure 3. Concept map – contexts of patient engagement in health services research  
Figure legend: Oval: elements that overlap across conceptual categories; Green: elements that reside in the intrapersonal domain; Orange: elements that reside in the process domain.

430x322mm (118 x 118 DPI)

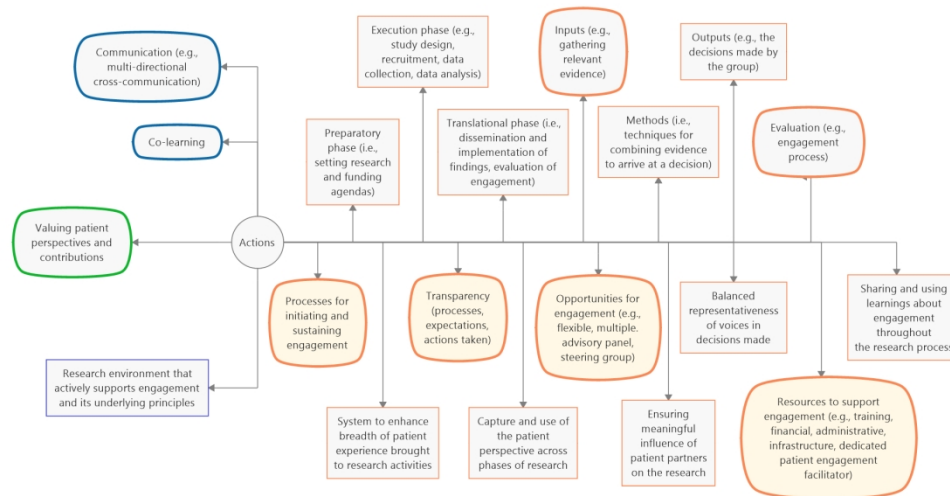

Figure 4. Concept map – actions of patient engagement in health services research  
 Figure legend: Coloured: elements that overlap within conceptual categories; Oval: elements that overlap across conceptual categories; Green: elements that reside in the intrapersonal domain; Blue: elements that reside in the interpersonal domain; Orange: elements that reside in the process domain; Purple: elements that reside in the environment domain.

430x322mm (118 x 118 DPI)

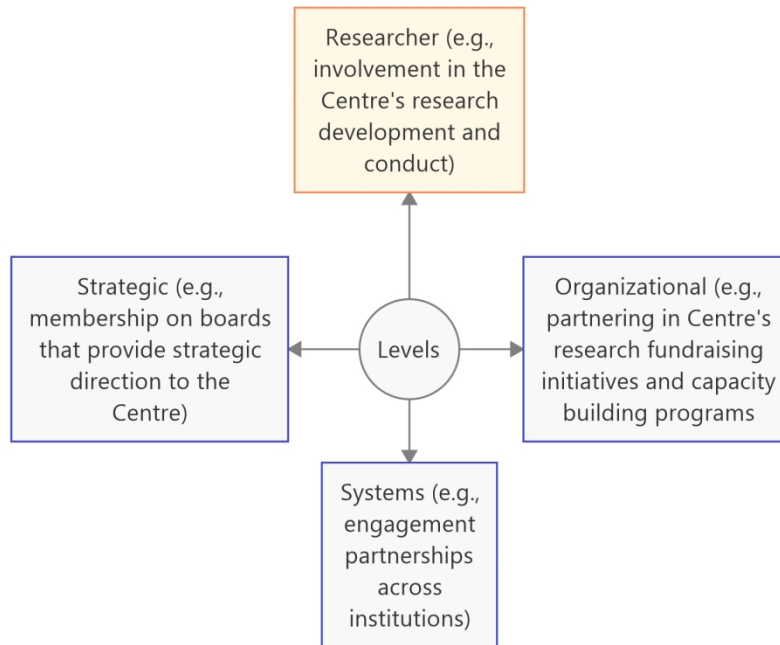

31 Figure 5. Concept map – outcomes of patient engagement in health services research  
32 Figure legend: Coloured: elements that overlap within conceptual categories; Oval: elements that overlap  
33 across conceptual categories; Green: elements that reside in the intrapersonal domain; Blue: elements that  
34 reside in the interpersonal domain; Orange: elements that reside in the process domain; Purple: elements  
35 that reside in the environment domain; Yellow: elements that reside in the health system and outcomes  
36 domain.

37 430x322mm (118 x 118 DPI)

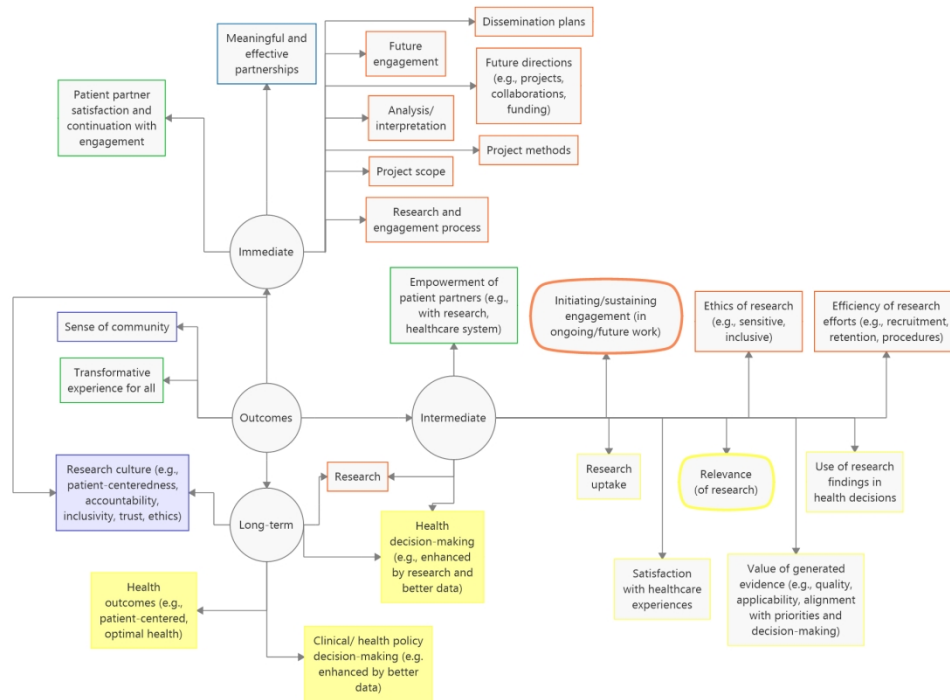

Figure 6. Concept map – organizational levels of patient engagement in health services research  
 Figure legend: Coloured: elements that overlap within conceptual categories; Orange: elements that reside in the process domain; Purple: elements that reside in the environment domain.

430x322mm (118 x 118 DPI)

1  
2  
3  
4 Appendix 1 –Search strategy for MEDLINE (Ovid)  
5  
6

- 7 1. Patient Participation/  
8  
9 2. models, theoretical/ or patient-specific modeling/  
10  
11 3. (patient\* adj3 engag\*).mp.  
12  
13 4. (model or models or framework\*).mp.  
14  
15 5. research.mp.  
16  
17 6. ("patient oriented research" or "patient and public involvement" or "patient involvement"  
18 or "stakeholder engagement").mp.  
19  
20 7. 1 or 3 or 6  
21  
22 8. 2 or 4  
23  
24 9. 5 and 7 and 8  
25  
26  
27  
28  
29  
30  
31  
32  
33  
34  
35  
36  
37  
38  
39  
40  
41  
42  
43  
44  
45  
46  
47  
48  
49  
50  
51  
52  
53  
54  
55  
56  
57  
58  
59  
60

## Appendix 2 – Standardized data extraction form

### Notes on using a data extraction form:

- Be consistent in the order and style you use to describe the information for each report.
- Record any missing information as unclear or not described, to make it clear that the information was not found in the study report(s), not that you forgot to extract it.
- Include any instructions and decision rules on the data collection form, or in an accompanying document. It is important to practice using the form and give training to any other authors using the form.

### Decision rules

- Only include models and framework that are explicitly labelled by study authors as such

### General Information

|                                            |  |
|--------------------------------------------|--|
| Date form completed<br><i>(dd/mm/yyyy)</i> |  |
| Name of data extractor                     |  |
|                                            |  |

### Study authors (characteristics of)

|                                                                  | <b>Descriptions as stated in report/paper or note otherwise</b> | <b>Location in text or source</b> ( <i>pg &amp; ¶/fig/table/other</i> ) |
|------------------------------------------------------------------|-----------------------------------------------------------------|-------------------------------------------------------------------------|
| <b>Author last names</b>                                         |                                                                 |                                                                         |
| <b>Country</b> ( <i>of authors' institutional affiliations</i> ) |                                                                 |                                                                         |



|                                                                                            |  |  |
|--------------------------------------------------------------------------------------------|--|--|
| <b>Lens of authors</b><br><i>(by individuals,<br/> cluster/ groups or<br/> body parts)</i> |  |  |
| <b>Notes:</b>                                                                              |  |  |

Publication (characteristics of)

|                            | <b>Descriptions as stated in report/paper or note<br/> otherwise</b> | <b>Location in text<br/> or source</b> <i>(pg &amp;<br/> ¶/fig/table/other<br/> )</i> |
|----------------------------|----------------------------------------------------------------------|---------------------------------------------------------------------------------------|
| <b>Study name</b>          |                                                                      |                                                                                       |
| <b>Publication year</b>    |                                                                      |                                                                                       |
| <b>Journal</b>             |                                                                      |                                                                                       |
| <b>Is study published?</b> | <b>Yes</b> <b>No</b>                                                 |                                                                                       |
| <b>Notes:</b>              |                                                                      |                                                                                       |

Model/framework (characteristics of)

|                                            | <b>Descriptions as stated in report/paper or note<br/> otherwise</b> | <b>Location in text<br/> or source</b> <i>(pg &amp;<br/> ¶/fig/table/other<br/> )</i> |
|--------------------------------------------|----------------------------------------------------------------------|---------------------------------------------------------------------------------------|
| <b>Name of<br/> model/framework</b>        |                                                                      |                                                                                       |
| <b>Purpose/aim of<br/> model/framework</b> |                                                                      |                                                                                       |

|                                                              | <b>Descriptions as stated in report/paper or note otherwise</b> | <b>Location in text or source</b> ( <i>pg &amp; ¶/fig/table/other</i> ) |
|--------------------------------------------------------------|-----------------------------------------------------------------|-------------------------------------------------------------------------|
| <b>Population developed in/for</b>                           |                                                                 |                                                                         |
| <b>Methods used to develop m/f?</b>                          |                                                                 |                                                                         |
| <b>Patients involved in m/f development (and if so how)?</b> |                                                                 |                                                                         |
| <b>Targeted stage of research process</b>                    |                                                                 |                                                                         |
| <b>Elements (description)</b>                                |                                                                 |                                                                         |
| <b>Proposed relations between elements</b>                   |                                                                 |                                                                         |
| <b>Location on spectrum of engagement</b>                    |                                                                 |                                                                         |
| <b>Strs/weaknesses of model/framework (stated in study)</b>  |                                                                 |                                                                         |
| <b>Notes:</b>                                                |                                                                 |                                                                         |

Model/framework (figure presented in text)

## Definitions

|                          |                                                                                                                                                                                                                                                                                                                                                                                                                                                   |
|--------------------------|---------------------------------------------------------------------------------------------------------------------------------------------------------------------------------------------------------------------------------------------------------------------------------------------------------------------------------------------------------------------------------------------------------------------------------------------------|
| Model                    | A descriptive and deliberate simplification of a phenomenon or an aspect of a phenomenon                                                                                                                                                                                                                                                                                                                                                          |
| Framework                | A shared orientation for studying, explaining, and understanding phenomena of interest through the description and identification of the universal elements underlying a phenomenon of interest                                                                                                                                                                                                                                                   |
| Patient engagement       | Meaningful and active collaboration of patients in research governance, priority setting, conduct, and knowledge translation                                                                                                                                                                                                                                                                                                                      |
| Health services research | The study of how social factors, financing systems, organizational structures and processes, health technologies, and personal behaviours affect access to health care, the quality and cost of health care, and, ultimately, the population's health and well-being. It includes research with the goal of improving the efficiency and effectiveness of health professionals and the health care system, through changes to practice and policy |

## Inclusion/exclusion criteria

| Inclusion                                      | Exclusion                                                                                                                                                                                                                                                                                                                                                                                   |
|------------------------------------------------|---------------------------------------------------------------------------------------------------------------------------------------------------------------------------------------------------------------------------------------------------------------------------------------------------------------------------------------------------------------------------------------------|
| Published or unpublished model or framework of | Models/frameworks not focused on health services research, such as those related to: <ul style="list-style-type: none"> <li>• clinical decision-making/practice,</li> <li>• active role of patients in health management,</li> <li>• therapeutic engagement,</li> <li>• understanding disease experience</li> <li>• technology engagement</li> <li>• the pharmaceutical industry</li> </ul> |
| Patient engagement in                          | Not written in English                                                                                                                                                                                                                                                                                                                                                                      |
| Health services research                       | Unavailable as full-text                                                                                                                                                                                                                                                                                                                                                                    |

## Appendix 3 – PRISMA diagram

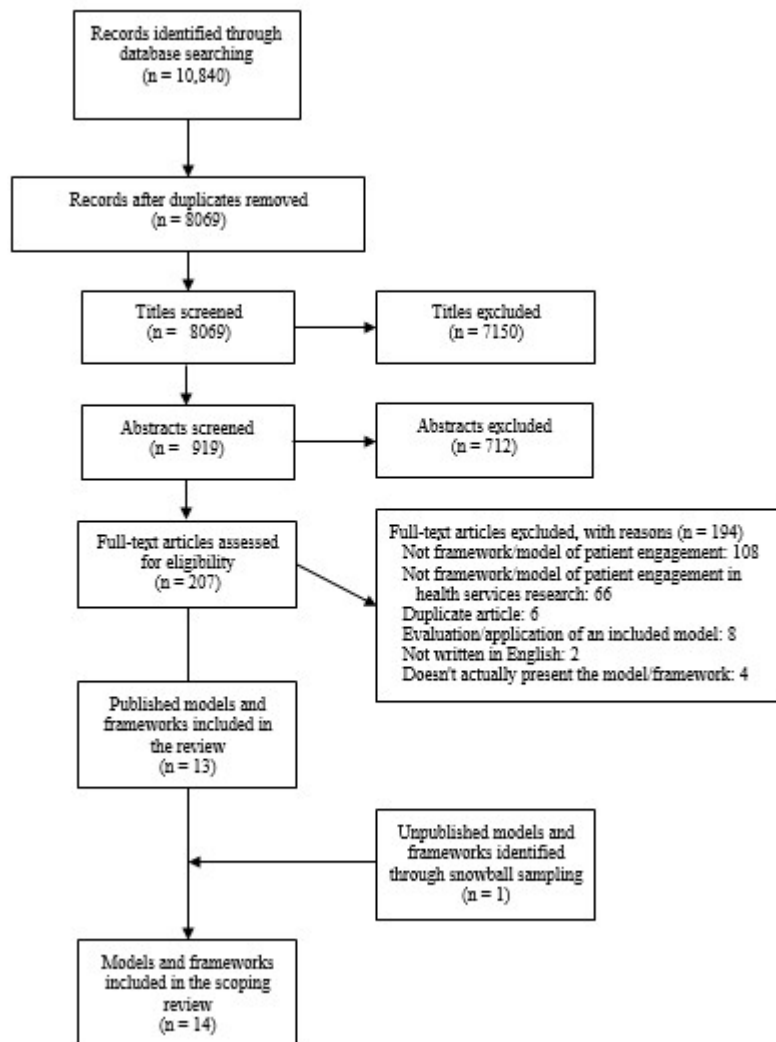

## Appendix 4. Select characteristics of included articles and/or models and frameworks

| Article                                         | Characteristics of the ...                         |                                                                                                                                                     |                                                                                                                                                                              |                                                                                                                                             |
|-------------------------------------------------|----------------------------------------------------|-----------------------------------------------------------------------------------------------------------------------------------------------------|------------------------------------------------------------------------------------------------------------------------------------------------------------------------------|---------------------------------------------------------------------------------------------------------------------------------------------|
|                                                 | Model/framework                                    |                                                                                                                                                     |                                                                                                                                                                              |                                                                                                                                             |
| First author/<br>reference/<br>country/<br>year | Name                                               | Purpose                                                                                                                                             | Methods of<br>development                                                                                                                                                    | Were patient co-<br>researchers involved<br>in its development<br>(yes/no/not specified –<br>population)                                    |
| Daveson/<br>28 /<br>UK/<br>2015                 | Not specified                                      | An optimal involvement model that fulfills the needs of both users and researchers while acknowledging any potential diversity between these groups | Consultation workshop attended by patients and caregivers                                                                                                                    | Yes – patients actively involved in Cicely Saunders Institute palliative care research                                                      |
| Deverka/<br>25 /<br>USA/<br>2012                | Conceptual model for stakeholder engagement in CER | A conceptual model for involving stakeholders in the CER process                                                                                    | Literature search, followed by practical experience with an existing stakeholder engagement process/project, and review and revision by an expert panel (including patients) | Yes - patients engaged with the Center for CANCERGEN project                                                                                |
| Evans/<br>26 /<br>UK/<br>2019                   | SUCCESS model                                      | Not stated                                                                                                                                          | Initially developed through a workshop, then reviewed and refined through meetings and email discussions.                                                                    | Yes - people diagnosed with, or caring for someone with, a chronic or long-term condition                                                   |
| Evans/<br>23 /<br>UK and<br>Wales/<br>2020      | PRIME Centre Wales                                 | To enable and promote successful patient engagement across research activities within their research centre.                                        | Informed by the research literature and the development of an engagement plan with the help of patients.                                                                     | Yes – people with experience of using health services and caring for family members as well as people diagnosed with, or caring for someone |

## Characteristics of the ...

## Model/framework

| Article                                         | Characteristics of the ...<br>Model/framework                      |                                                                                                                                                                                                                                                             |                                                                                                                          |                                                                                                                                                              |
|-------------------------------------------------|--------------------------------------------------------------------|-------------------------------------------------------------------------------------------------------------------------------------------------------------------------------------------------------------------------------------------------------------|--------------------------------------------------------------------------------------------------------------------------|--------------------------------------------------------------------------------------------------------------------------------------------------------------|
| First author/<br>reference/<br>country/<br>year | Name                                                               | Purpose                                                                                                                                                                                                                                                     | Methods of<br>development                                                                                                | Were patient co-<br>researchers involved<br>in its development<br>(yes/no/not specified –<br>population)                                                     |
| Frank/<br>27 /<br>USA/<br>2015                  | Conceptual model<br>for PCOR                                       | To provide the basis<br>for subsequent<br>evaluative<br>frameworks, to guide<br>evaluation of PCOR,<br>and to serve as a<br>foundation for<br>measurement models,<br>to allow testing of<br>hypothesized<br>relationships between<br>elements in the model. | Literature search and<br>worked with a patient<br>advisory panel                                                         | with, a chronic or long-<br>term condition<br><br>Yes - members of the<br>PCORI Patient<br>Engagement Advisory<br>Panel                                      |
| Gessell/<br>29 /<br>USA/<br>2017                | Not specified                                                      | To maximize<br>stakeholder<br>engagement within<br>the context of a<br>pragmatic trial                                                                                                                                                                      | "Expanded"<br>engagement<br>standards that were<br>previously proposed<br>to PCORI standards                             | Not specified                                                                                                                                                |
| Gibson/<br>30 /<br>UK/<br>2017                  | Not specified                                                      | To map and evaluate<br>patient engagement<br>interactions in health<br>services research                                                                                                                                                                    | Adapted the<br>researchers'<br>previously developed<br>model through<br>workshops held with<br>various patient<br>groups | Yes - the language used<br>within the adapted<br>model passed through<br>iterative changes<br>involving both the<br>researchers and<br>workshop participants |
| Goeman/<br>33 /<br>Australia/<br>2019           | Model for<br>successful inclusion<br>of consumers and<br>community | The successful<br>inclusion of<br>consumers in research                                                                                                                                                                                                     | Co-design process<br>involving expert<br>working and<br>reference groups                                                 | Yes - People living with<br>dementia and their care-<br>partners (“consumers”)                                                                               |

## Characteristics of the ...

## Model/framework

| Article                                         |                                                                                                                                                                                            |                                                                                                                                                |                                                                                                                                                                                                                                                 |                                                                                                          |
|-------------------------------------------------|--------------------------------------------------------------------------------------------------------------------------------------------------------------------------------------------|------------------------------------------------------------------------------------------------------------------------------------------------|-------------------------------------------------------------------------------------------------------------------------------------------------------------------------------------------------------------------------------------------------|----------------------------------------------------------------------------------------------------------|
| First author/<br>reference/<br>country/<br>year | Name                                                                                                                                                                                       | Purpose                                                                                                                                        | Methods of<br>development                                                                                                                                                                                                                       | Were patient co-<br>researchers involved<br>in its development<br>(yes/no/not specified –<br>population) |
|                                                 | representatives in<br>research                                                                                                                                                             |                                                                                                                                                |                                                                                                                                                                                                                                                 |                                                                                                          |
| Holmes/<br>22/<br>Canada/<br>2018               | BC SUPPORT Unit<br>Framework                                                                                                                                                               | To conceptualize and<br>organize patient<br>engagement activities                                                                              | Not specified                                                                                                                                                                                                                                   | Not specified                                                                                            |
| Pearson/<br>31 /<br>UK/<br>2013                 | A provisional model<br>for patient<br>engagement in<br>healthcare OR                                                                                                                       | A model for patient<br>engagement in<br>healthcare OR                                                                                          | Not specified                                                                                                                                                                                                                                   | Not specified                                                                                            |
| Ray/<br>34 /<br>USA/<br>2017                    | Conceptual model<br>for understanding<br>impact of<br>stakeholder<br>engagement and<br>differentiating<br>stakeholder-engaged<br>research from<br>research on<br>stakeholder<br>engagement | A framework for<br>planning, evaluating,<br>and reporting both<br>stakeholder-engaged<br>research and research<br>on stakeholder<br>engagement | Initial framework<br>developed based on<br>synthesis of existing<br>literature; refined<br>through use in a<br>patient engagement<br>research project<br>which examined<br>families' experiences<br>of access to pediatric<br>subspecialty care | No                                                                                                       |
| Ruco/<br>35 /<br>Canada/<br>2016                | Sunnybrook Health<br>Sciences Centre<br>patient engagement<br>in PBRI framework                                                                                                            | To guide and capture<br>the range and scope of<br>patient engagement in<br>PBRI at Sunnybrook<br>Health Sciences<br>Centre, Toronto            | Developed based on<br>CIHR's Supporting<br>POR Visual Value<br>Model for Patient<br>Engagement and in<br>alignment with<br>Sunnybrook's PBRI<br>Strategic plan                                                                                  | Not specified                                                                                            |
| Shippee/<br>32 /                                | Framework for<br>PSUE                                                                                                                                                                      | To develop a<br>standardized,<br>evidence-based                                                                                                | Systematic<br>review/environmental<br>scan/manual                                                                                                                                                                                               | Yes - patient advisory<br>group consisting of                                                            |

## Characteristics of the ...

## Model/framework

| Article                                         | Characteristics of the ...<br>Model/framework |                                                                                                                      |                                                                                                                                              |                                                                                                          |
|-------------------------------------------------|-----------------------------------------------|----------------------------------------------------------------------------------------------------------------------|----------------------------------------------------------------------------------------------------------------------------------------------|----------------------------------------------------------------------------------------------------------|
| First author/<br>reference/<br>country/<br>year | Name                                          | Purpose                                                                                                              | Methods of<br>development                                                                                                                    | Were patient co-<br>researchers involved<br>in its development<br>(yes/no/not specified –<br>population) |
| USA/<br>2013                                    |                                               | framework for<br>understanding,<br>reporting, and<br>assessing PSUE in<br>biomedical and health<br>services research | literature search that<br>was synthesized into<br>a two-part framework<br>and supplemented<br>with input from a<br>patient advisory<br>group | community member<br>PSUEs                                                                                |
| Jose/<br>Unpublished/<br>2020                   | CONNECT<br>framework                          | To engage members<br>of the autistic<br>community in<br>research                                                     | Developed as part of<br>work on the<br>CONNECT project,<br>including 2 feedback<br>questionnaires<br>designed for the<br>study               | Yes – members of the<br>autistic community                                                               |

CANCERGEN = comparative effectiveness research in cancer genomics; CER = comparative effectiveness research; CIHR = Canadian Institutes of Research; OR = operations research; PBRI = practice-based research and innovation; PCORI = patient-centered outcomes research institute; POR = patient-oriented research; PSUE = patient and service user engagement; SUCCESS = service users with chronic conditions encouraging sensible solutions.



## Preferred Reporting Items for Systematic reviews and Meta-Analyses extension for Scoping Reviews (PRISMA-ScR) Checklist

| SECTION                                               | ITEM | PRISMA-ScR CHECKLIST ITEM                                                                                                                                                                                                                                                                                  | REPORTED ON PAGE # |
|-------------------------------------------------------|------|------------------------------------------------------------------------------------------------------------------------------------------------------------------------------------------------------------------------------------------------------------------------------------------------------------|--------------------|
| <b>TITLE</b>                                          |      |                                                                                                                                                                                                                                                                                                            |                    |
| Title                                                 | 1    | Identify the report as a scoping review.                                                                                                                                                                                                                                                                   | 1                  |
| <b>ABSTRACT</b>                                       |      |                                                                                                                                                                                                                                                                                                            |                    |
| Structured summary                                    | 2    | Provide a structured summary that includes (as applicable): background, objectives, eligibility criteria, sources of evidence, charting methods, results, and conclusions that relate to the review questions and objectives.                                                                              | 2                  |
| <b>INTRODUCTION</b>                                   |      |                                                                                                                                                                                                                                                                                                            |                    |
| Rationale                                             | 3    | Describe the rationale for the review in the context of what is already known. Explain why the review questions/objectives lend themselves to a scoping review approach.                                                                                                                                   | 4-7                |
| Objectives                                            | 4    | Provide an explicit statement of the questions and objectives being addressed with reference to their key elements (e.g., population or participants, concepts, and context) or other relevant key elements used to conceptualize the review questions and/or objectives.                                  | 7                  |
| <b>METHODS</b>                                        |      |                                                                                                                                                                                                                                                                                                            |                    |
| Protocol and registration                             | 5    | Indicate whether a review protocol exists; state if and where it can be accessed (e.g., a Web address); and if available, provide registration information, including the registration number.                                                                                                             | 7-8                |
| Eligibility criteria                                  | 6    | Specify characteristics of the sources of evidence used as eligibility criteria (e.g., years considered, language, and publication status), and provide a rationale.                                                                                                                                       | 8                  |
| Information sources*                                  | 7    | Describe all information sources in the search (e.g., databases with dates of coverage and contact with authors to identify additional sources), as well as the date the most recent search was executed.                                                                                                  | 9                  |
| Search                                                | 8    | Present the full electronic search strategy for at least 1 database, including any limits used, such that it could be repeated.                                                                                                                                                                            | Appendix 1         |
| Selection of sources of evidence†                     | 9    | State the process for selecting sources of evidence (i.e., screening and eligibility) included in the scoping review.                                                                                                                                                                                      | 9                  |
| Data charting process‡                                | 10   | Describe the methods of charting data from the included sources of evidence (e.g., calibrated forms or forms that have been tested by the team before their use, and whether data charting was done independently or in duplicate) and any processes for obtaining and confirming data from investigators. | 9-10               |
| Data items                                            | 11   | List and define all variables for which data were sought and any assumptions and simplifications made.                                                                                                                                                                                                     | Appendix 2         |
| Critical appraisal of individual sources of evidence§ | 12   | If done, provide a rationale for conducting a critical appraisal of included sources of evidence; describe the methods used and how this information was used in any data synthesis (if appropriate).                                                                                                      | N/A                |

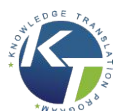

| SECTION                                       | ITEM | PRISMA-ScR CHECKLIST ITEM                                                                                                                                                                       | REPORTED ON PAGE # |
|-----------------------------------------------|------|-------------------------------------------------------------------------------------------------------------------------------------------------------------------------------------------------|--------------------|
| Synthesis of results                          | 13   | Describe the methods of handling and summarizing the data that were charted.                                                                                                                    | 10                 |
| <b>RESULTS</b>                                |      |                                                                                                                                                                                                 |                    |
| Selection of sources of evidence              | 14   | Give numbers of sources of evidence screened, assessed for eligibility, and included in the review, with reasons for exclusions at each stage, ideally using a flow diagram.                    | 12, Appendix 3     |
| Characteristics of sources of evidence        | 15   | For each source of evidence, present characteristics for which data were charted and provide the citations.                                                                                     | 12-13, Appendix 4  |
| Critical appraisal within sources of evidence | 16   | If done, present data on critical appraisal of included sources of evidence (see item 12).                                                                                                      | N/A                |
| Results of individual sources of evidence     | 17   | For each included source of evidence, present the relevant data that were charted that relate to the review questions and objectives.                                                           | 13-18              |
| Synthesis of results                          | 18   | Summarize and/or present the charting results as they relate to the review questions and objectives.                                                                                            | 13-14              |
| <b>DISCUSSION</b>                             |      |                                                                                                                                                                                                 |                    |
| Summary of evidence                           | 19   | Summarize the main results (including an overview of concepts, themes, and types of evidence available), link to the review questions and objectives, and consider the relevance to key groups. | 18-21              |
| Limitations                                   | 20   | Discuss the limitations of the scoping review process.                                                                                                                                          | 19                 |
| Conclusions                                   | 21   | Provide a general interpretation of the results with respect to the review questions and objectives, as well as potential implications and/or next steps.                                       | 21-22              |
| <b>FUNDING</b>                                |      |                                                                                                                                                                                                 |                    |
| Funding                                       | 22   | Describe sources of funding for the included sources of evidence, as well as sources of funding for the scoping review. Describe the role of the funders of the scoping review.                 | 22-23              |

JBI = Joanna Briggs Institute; PRISMA-ScR = Preferred Reporting Items for Systematic reviews and Meta-Analyses extension for Scoping Reviews.

\* Where *sources of evidence* (see second footnote) are compiled from, such as bibliographic databases, social media platforms, and Web sites.

† A more inclusive/heterogeneous term used to account for the different types of evidence or data sources (e.g., quantitative and/or qualitative research, expert opinion, and policy documents) that may be eligible in a scoping review as opposed to only studies. This is not to be confused with *information sources* (see first footnote).

‡ The frameworks by Arksey and O'Malley (6) and Levac and colleagues (7) and the JBI guidance (4, 5) refer to the process of data extraction in a scoping review as data charting.

§ The process of systematically examining research evidence to assess its validity, results, and relevance before using it to inform a decision. This term is used for items 12 and 19 instead of "risk of bias" (which is more applicable to systematic reviews of interventions) to include and acknowledge the various sources of evidence that may be used in a scoping review (e.g., quantitative and/or qualitative research, expert opinion, and policy document).

From: Tricco AC, Lillie E, Zarin W, O'Brien KK, Colquhoun H, Levac D, et al. PRISMA Extension for Scoping Reviews (PRISMA-ScR): Checklist and Explanation. *Ann Intern Med.* 2018;169:467–473. doi: [10.7326/M18-0850](https://doi.org/10.7326/M18-0850).

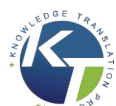

St. Michael's

Inspired Care.  
Inspiring Science.

For peer review only - <http://bmjopen.bmj.com/site/about/guidelines.xhtml>

## GRIPP2-short form checklist

| Section and topic                                                                                                                                                                       | Item                                                                                                                                                                                                                                                                                                                                         | Line numbers        |
|-----------------------------------------------------------------------------------------------------------------------------------------------------------------------------------------|----------------------------------------------------------------------------------------------------------------------------------------------------------------------------------------------------------------------------------------------------------------------------------------------------------------------------------------------|---------------------|
| <b>1: Aim</b><br>Report the aim of the study                                                                                                                                            | Our primary objective was to count and describe the elements that overlap (i.e., present in 2 or more models or frameworks) and diverge between identified models and frameworks.                                                                                                                                                            | 120-122             |
| <b>2: Methods</b><br>Provide a clear description of the methods used for patient and public involvement (PPI) in the study                                                              | We engaged two patient co-researchers (R.S. and S.H.), at the level of involve (24), in the design and conduct of this study... The primary methods of engagement were 1-on-1 and small group meetings, as guided by a terms of reference co-developed at the outset of the research partnership.                                            | 207-208,<br>213-214 |
| <b>3: Results</b><br>Outcomes—Report the results of PPI in the study, including both positive and negative outcomes                                                                     | They were involved in development and publication of the scoping review protocol (19), provided feedback on the analyses (including element groupings), provided their perspectives on the interpretation of the study findings, and co-authored this manuscript.                                                                            | 208-210             |
| <b>4: Discussion</b><br>Outcomes—Comment on the extent to which PPI influenced the study overall. Describe positive and negative effects                                                | In helping shape these stages of the research cycle and related outputs, a notable impact of engagement also included identifying gaps in the current literature relevant to patient partners.                                                                                                                                               | 210-212             |
| <b>5: Reflections</b><br>Critical perspective—Comment critically on the study, reflecting on the things that went well and those that did not, so others can learn from this experience | Further, the engagement of patient co-researchers in our scoping review at the level of involve limited their opportunities to formally provide insights and expertise to pre-determined study milestones. Engagement at the level of collaborate or empower may have resulted in other insights through more direct contact with the study. | 388-392             |

Adapted from: *BMJ* 2017;358:j3453

# BMJ Open

## A scoping review of models and frameworks of patient engagement in health services research

|                                 |                                                                                                                                                                                                                                                                                                                                                                                                                                                                                                                                     |
|---------------------------------|-------------------------------------------------------------------------------------------------------------------------------------------------------------------------------------------------------------------------------------------------------------------------------------------------------------------------------------------------------------------------------------------------------------------------------------------------------------------------------------------------------------------------------------|
| Journal:                        | <i>BMJ Open</i>                                                                                                                                                                                                                                                                                                                                                                                                                                                                                                                     |
| Manuscript ID                   | bmjopen-2022-063507.R1                                                                                                                                                                                                                                                                                                                                                                                                                                                                                                              |
| Article Type:                   | Original research                                                                                                                                                                                                                                                                                                                                                                                                                                                                                                                   |
| Date Submitted by the Author:   | 21-Jul-2022                                                                                                                                                                                                                                                                                                                                                                                                                                                                                                                         |
| Complete List of Authors:       | Chudyk, Anna; University of Manitoba Faculty of Health Sciences<br>Horrill, Tara; The University of British Columbia School of Nursing<br>Waldman, Celeste; University of Manitoba<br>Demczuk, Lisa; University of Manitoba Elizabeth Dafoe Library<br>Shimmin, Carolyn; George and Fay Yee Centre for Healthcare Innovation<br>Stoddard, Roger; Horizon Health Network<br>Hickes, Serena; University of Manitoba Children's Hospital Research Institute of Manitoba<br>Schultz, Annette; University of Manitoba College of Nursing |
| <b>Primary Subject Heading</b>: | Health services research                                                                                                                                                                                                                                                                                                                                                                                                                                                                                                            |
| Secondary Subject Heading:      | Research methods                                                                                                                                                                                                                                                                                                                                                                                                                                                                                                                    |
| Keywords:                       | STATISTICS & RESEARCH METHODS, HEALTH SERVICES ADMINISTRATION & MANAGEMENT, MEDICAL EDUCATION & TRAINING                                                                                                                                                                                                                                                                                                                                                                                                                            |
|                                 |                                                                                                                                                                                                                                                                                                                                                                                                                                                                                                                                     |

SCHOLARONE™  
Manuscripts



I, the Submitting Author has the right to grant and does grant on behalf of all authors of the Work (as defined in the below author licence), an exclusive licence and/or a non-exclusive licence for contributions from authors who are: i) UK Crown employees; ii) where BMJ has agreed a CC-BY licence shall apply, and/or iii) in accordance with the terms applicable for US Federal Government officers or employees acting as part of their official duties; on a worldwide, perpetual, irrevocable, royalty-free basis to BMJ Publishing Group Ltd ("BMJ") its licensees and where the relevant Journal is co-owned by BMJ to the co-owners of the Journal, to publish the Work in this journal and any other BMJ products and to exploit all rights, as set out in our [licence](#).

The Submitting Author accepts and understands that any supply made under these terms is made by BMJ to the Submitting Author unless you are acting as an employee on behalf of your employer or a postgraduate student of an affiliated institution which is paying any applicable article publishing charge ("APC") for Open Access articles. Where the Submitting Author wishes to make the Work available on an Open Access basis (and intends to pay the relevant APC), the terms of reuse of such Open Access shall be governed by a Creative Commons licence – details of these licences and which [Creative Commons](#) licence will apply to this Work are set out in our licence referred to above.

Other than as permitted in any relevant BMJ Author's Self Archiving Policies, I confirm this Work has not been accepted for publication elsewhere, is not being considered for publication elsewhere and does not duplicate material already published. I confirm all authors consent to publication of this Work and authorise the granting of this licence.

1  
2  
3 **1 A scoping review of models and frameworks of patient engagement in health services**  
4  
5 **2 research**  
6

7  
8 **3**  
9  
10 4 Anna Maria Chudyk<sup>1</sup>, Tara Horrill<sup>2</sup>, Celeste Waldman<sup>†</sup>, Lisa Demczuk<sup>3</sup>, Carolyn Shimmin<sup>4</sup>,  
11  
12 5 Roger Stoddard<sup>5</sup>, Serena Hickes<sup>6</sup>, Annette SH Schultz<sup>7</sup>  
13  
14 **6**

15 **7 Affiliations and email addresses:**

16  
17  
18 8 <sup>1</sup>College of Nursing, Rady Faculty of Health Sciences, University of Manitoba, CR3024 - 369  
19  
20 9 Tache Avenue, Winnipeg MB, R2H 2A6, Canada. Email: [anna.chudyk@umanitoba.ca](mailto:anna.chudyk@umanitoba.ca)  
21

22  
23 10 <sup>2</sup>School of Nursing, University of British Columbia, T201-2211 Westbrook Mall, Vancouver  
24  
25 11 BC, V6T 2B5. Email: [tara.horrill@ubc.ca](mailto:tara.horrill@ubc.ca)  
26

27  
28 12 <sup>3</sup>Elizabeth Dafoe Library, University of Manitoba, 25 Chancellor's Circle, Winnipeg Manitoba,  
29  
30 13 R3T 2N2, Canada. Email: [Lisa.Demczuk@umanitoba.ca](mailto:Lisa.Demczuk@umanitoba.ca)  
31

32  
33 14 <sup>4</sup>George and Fay Yee Centre for Healthcare Innovation, 3<sup>rd</sup> floor – 753 McDermot Avenue,  
34  
35 15 Winnipeg Manitoba, R3E 0T6, Canada. Email: [cshimmin@exchange.hsc.mb.ca](mailto:cshimmin@exchange.hsc.mb.ca)  
36

37  
38 16 <sup>5</sup>Horizon Health Network, 80 Woodbridge Street, Fredericton New Brunswick, E3B 4R3,  
39  
40 17 Canada. Email: [rogerstodda@gmail.com](mailto:rogerstodda@gmail.com)  
41

42  
43 18 <sup>6</sup>Translating Emergency Knowledge for Kids (TREKK) Parent Advisory Group, Children's  
44  
45 19 Hospital Research Institute of Manitoba, 512E - 715 McDermot Avenue, Winnipeg Manitoba,  
46  
47 20 R3E 3P4, Canada. Winnipeg MB. Email: [shickes@gmail.com](mailto:shickes@gmail.com)  
48

49  
50 21 <sup>7</sup>College of Nursing, Rady Faculty of Health Sciences, University of Manitoba, CR3022 -  
51  
52 22 369 Tache Avenue, Winnipeg, Manitoba, R2H 2A6, Canada. Email:  
53  
54 23 [Annette.Schultz@umanitoba.ca](mailto:Annette.Schultz@umanitoba.ca)

55 24 <sup>†</sup>Deceased.  
56  
57  
58  
59  
60

1  
2  
3 **25 Correspondence to:**  
4

5 **26** Anna Maria Chudyk, College of Nursing, Rady Faculty of Health Sciences, University of  
6

7 **27** Manitoba, CR3024 - 369 Tache Avenue, Winnipeg MB, R2H 2A6, Canada. Email:  
8

9  
10 **28** [anna.chudyk@umanitoba.ca](mailto:anna.chudyk@umanitoba.ca)  
11  
12 **29**

13  
14 **30 Abstract**

15 **31 Objective:** To count and describe the elements that overlap (i.e., present in 2 or more) and  
16  
17 **32** diverge between models and frameworks of patient engagement in health services research. Our  
18  
19 **33** specific research question was, “What are the elements that underlie models and frameworks of  
20  
21 **34** patient engagement in health services research?”  
22  
23

24  
25 **35 Design:** Scoping review.  
26  
27

28  
29 **36 Data sources:** On July 6–7, 2021, we searched six electronic databases (CINAHL, Cochrane  
30  
31 **37** Database of Systematic Reviews, Joanna Briggs Institute Evidence Based Practice Database,  
32  
33 **38** MEDLINE, PsycINFO, and Scopus) and Google Scholar for published literature, and ProQuest  
34  
35 **39** Dissertations & Theses, Conference Proceedings Citation Index, Google, and key agencies’  
36  
37 **40** websites for unpublished (i.e., grey) literature, with no date restrictions. These searches were  
38  
39 **41** supplemented by snowball sampling.  
40  
41  
42  
43

44 **42 Eligibility criteria:** We included published and unpublished literature that presented (a) models  
45  
46 **43** or frameworks (b) of patient engagement (c) in health services research. We excluded articles  
47  
48 **44** unavailable as full-text or not written in English.  
49  
50  
51  
52  
53  
54  
55  
56  
57  
58  
59  
60

1  
2  
3 45 **Data extraction and synthesis:** Two independent reviewers extracted data from included  
4  
5 46 articles using an a-priori developed standardized form. Data were synthesized using both  
6  
7 47 quantitative (i.e., counts) and qualitative (i.e., mapping) analyses.  
8  
9

10 48 **Results:** We identified a total of 8069 articles and ultimately included 14 models and  
11  
12 49 frameworks in the review. These models and frameworks were comprised of 18 overlapping and  
13  
14 50 57 diverging elements, that were organized into six conceptual categories (i.e., principles,  
15  
16 51 foundational components, contexts, actions, levels, and outcomes) and spanned intrapersonal,  
17  
18 52 interpersonal, process, environmental, and health systems and outcomes domains.  
19  
20

21 53 **Conclusions:** There is little overlap between the elements that comprise existing models and  
22  
23 54 frameworks of patient engagement in health services research. Those seeking to apply these  
24  
25 55 models and frameworks should consider the “fit” of each element, by conceptual category and  
26  
27 56 domain, within the context of their study.  
28  
29  
30

31  
32  
33 57

34  
35 58 **Keywords**

36  
37  
38 59 Patient and public involvement, stakeholder engagement, patient involvement, patient-oriented  
39  
40 60 research, consumer and community involvement  
41  
42  
43  
44  
45  
46  
47  
48  
49  
50  
51  
52  
53  
54  
55  
56  
57  
58  
59  
60



1  
2  
3 **61 Strengths and limitations of this study**  
4

- 5 **62**       • The study's methodological strengths include use of a published protocol and the  
6  
7 **63**       analysis approach, which supported mapping model and framework elements to generate  
8  
9 **64**       a toolbox of options for researchers to use in their own patient-engaged research.  
10  
11  
12 **65**       • Another strength is the involvement of an interdisciplinary research team comprised of  
13  
14 **66**       content experts, including patient co-researchers.  
15  
16  
17 **67**       • A weakness of this study concerns the grey boundaries between health services research  
18  
19 **68**       and other forms of health research.  
20  
21  
22 **69**       • Greater engagement of patient co-researchers would have likely resulted in other study  
23  
24 **70**       insights through more direct contact with the study.  
25  
26  
27  
28  
29  
30  
31  
32  
33  
34  
35  
36  
37  
38  
39  
40  
41  
42  
43  
44  
45  
46  
47  
48  
49  
50  
51  
52  
53  
54  
55  
56  
57  
58  
59  
60

## 71 Introduction

72 Patient engagement in research involves the formation of meaningful and active collaborations  
73 between academic researchers and patients (i.e., an overarching term that refers to individuals  
74 with personal experience of a health issue and informal caregivers) in research governance,  
75 priority setting, conduct, and knowledge translation<sup>1</sup>. Globally, it is also commonly referred to  
76 as patient and public involvement, patient involvement, consumer and community involvement,  
77 and stakeholder engagement in research. This research approach necessitates a shift from the  
78 patient's traditional role as a study participant to that of a research collaborator or partner (i.e.,  
79 patient co-researcher). This shift in roles and power dynamics reflects the approach's roots in  
80 participatory research<sup>2</sup> and is founded on the premises that those affected by a problem should  
81 be actively involved in the generation of solutions to it<sup>3</sup>, and individuals' critical reflections on  
82 first-hand experiences are essential to effecting individual and social change<sup>4</sup>. A growing body  
83 of evidence supports the benefits of patient engagement in research, including improved  
84 enrollment and decreased attrition rates<sup>5</sup>, increased relevance of research and accessibility of  
85 study materials to study participants<sup>6</sup>, improved trial design<sup>7</sup>, and increased meaningfulness and  
86 understandability of disseminated findings<sup>5 6</sup>. However, despite its underlying rationale and  
87 documented benefits, academic researchers report hesitance in adopting this research approach<sup>8</sup>  
88 <sup>9</sup>.

89  
90 Some of the reported challenges of patient engagement in research include uncertainty about the  
91 process (i.e., "how-to" engage patients in research) and the need for a culture shift that supports  
92 these collaborations<sup>8 9</sup>. As there is no standard process for engaging patients in research, this  
93 first challenge is not surprising<sup>5 6 10</sup>. That is, how patient engagement is operationalized may

1  
2  
3 94 vary according to the characteristics of a given project (e.g., design, scope, time, and financial  
4  
5 95 resources) and patient and academic co-researchers (e.g., personal and professional backgrounds,  
6  
7 96 interests, skills). Further, the underlying cultural shift needed to support patient engagement in  
8  
9  
10 97 research necessitates the redistribution of power and restructuring of traditional research  
11  
12 98 paradigms to support shared planning and decision-making throughout a study<sup>10</sup>. This requires a  
13  
14 99 mutual understanding and vision for what these research collaborations entail. An exploration of  
15  
16  
17 100 the models and frameworks that underlie patient engagement in research may help clarify the  
18  
19 101 processes and support the culture shift necessary for this approach by shedding light on the  
20  
21 102 universal elements that underlie it.  
22  
23  
24 103

25  
26 104 Three previous reviews have broadly synthesized the literature on models, frameworks and/or  
27  
28 105 other systematic approaches to the engagement of patients (and in the case of Jull et al. - other  
29  
30 106 knowledge users) in research<sup>11-13</sup>. Of these, only one described the elements that comprised  
31  
32  
33 107 identified frameworks and guidelines describing best practices for engaging patients in  
34  
35 108 research<sup>12</sup>. Perhaps more importantly, none of these reviews focused on health services research,  
36  
37 109 which entails considerations unique to health research. Specifically, health services research  
38  
39  
40 110 focuses on the impact of social factors, financing systems, organizational structures and  
41  
42 111 processes, health technologies, and personal behaviours on health care access, quality and cost,  
43  
44 112 and population health and well-being<sup>14</sup>. This differs substantially from general health research,  
45  
46  
47 113 where the goal of engagement is often to improve clinical outcomes, the effectiveness of a  
48  
49 114 particular intervention, or uptake of research among patients with a specific condition. Engaging  
50  
51 115 patients in health services research may require added considerations related to partnering with a  
52  
53  
54 116 more diverse group of patients with lived experience of different conditions, groups,  
55  
56  
57  
58  
59  
60

1  
2  
3 117 interventions, and/or interactions with the health care system. Therefore, we set out to contribute  
4  
5 118 to the existing literature on patient engagement in research by conducting a knowledge synthesis  
6  
7 119 of models and frameworks of patient engagement in health services research. Specifically, we  
8  
9 120 undertook a scoping review, which is “a type of knowledge synthesis that addresses an  
10  
11 121 exploratory research question aimed at mapping key concepts, types of evidence, and gaps in  
12  
13 122 research related to a defined area or field by systematically searching, selecting, and synthesizing  
14  
15 123 existing knowledge”<sup>15</sup>.  
16  
17  
18  
19 124

### 125 ***Objectives***

126 The research question driving our review was, “What are the elements that underlie models and  
127 frameworks of patient engagement in health services research?” Our primary objective was to  
128 count and describe the elements that overlap (i.e., present in 2 or more models or frameworks)  
129 and diverge between identified models and frameworks. This objective intended to support a  
130 clearer understanding of similarities in thinking about patient engagement rather than to judge  
131 the relevance of elements or prescribe a “one size fits all” approach. Thus, rather than  
132 synthesizing the identified elements, we chose to map them according to the categories  
133 developed by the original authors and the themes that arose among them, with the vision of  
134 presenting a “toolbox” of potential approaches that researchers may choose from for their given  
135 research endeavor. Finally, the exploratory nature of our research question and our desire to  
136 identify and map key concepts that underlie patient engagement in research led us to adopt a  
137 scoping review methodology<sup>16</sup>.

138

### 139 **Methods**

1  
2  
3 140 Our scoping review's design and conduct followed the methodological framework proposed by  
4  
5 141 Arksey and O'Malley<sup>17</sup> and enhanced by Levac et al.<sup>18</sup>. The protocol for this scoping review,  
6  
7 142 including definitions of underlying key concepts, is published elsewhere<sup>19</sup>. Reporting was  
8  
9  
10 143 guided by the Preferred Reporting Items for Systematic Reviews and Meta-Analysis: Extension  
11  
12 144 for Scoping Review (PRISMA-ScR)<sup>20</sup> and the revised Guidance for Reporting Involvement of  
13  
14 145 Patients and the Public (GRIPP2) short form<sup>21</sup> checklists. Research ethics approval was not  
15  
16  
17 146 required as this study did not involve participants.  
18  
19  
20

147

### 21 148 *Eligibility criteria*

22  
23  
24 149 We included published and unpublished (i.e., grey) literature that presented (i) models or  
25  
26 150 frameworks (ii) of patient engagement (iii) in health services research. Both original and adapted  
27  
28 151 models and frameworks were eligible as long as they were developed in or for health services  
29  
30  
31 152 research. Since patient engagement also encompasses participation in research governance<sup>1</sup>, we  
32  
33 153 included models and frameworks that conceptualized how patient engagement in research was  
34  
35 154 embedded across the different levels of health services research centers. We excluded articles  
36  
37  
38 155 unavailable as full-text due to the limited descriptive information they provide (e.g., context,  
39  
40 156 description of development, underlying elements) and not written in English due to feasibility-  
41  
42 157 related considerations.  
43  
44

158

### 47 159 *Information sources*

48  
49 160 The lead author (A.M.C.) searched six electronic databases (CINAHL, Cochrane Database of  
50  
51 161 Systematic Reviews, Joanna Briggs Institute Evidence Based Practice Database, MEDLINE,  
52  
53  
54 162 PsycINFO, and Scopus) and Google Scholar for published literature. Electronic databases  
55  
56  
57  
58  
59

1  
2  
3 163 (ProQuest Dissertations & Theses and Conference Proceedings Citation Index), Google, and the  
4  
5 164 websites of key agencies (Canadian Institutes of Health Research, INVOLVE, Patient-Centered  
6  
7 165 Outcomes Research Institute) were searched for unpublished literature. These searches were  
8  
9  
10 166 supplemented by snowball sampling, which entailed backwards and forwards reference searches  
11  
12 167 of included articles and contacting experts in patient engagement in research for  
13  
14 168 recommendations about any potentially relevant models or frameworks.  
15  
16  
17 169

### 19 170 *Searches*

21 171 The search strategy was co-developed by an academic librarian (L.D.) and the lead author  
22  
23 172 (A.M.C.) and finalized through discussion with the rest of the research team. The search strategy  
24  
25 173 used a combination of search terms related to our underlying concepts (i.e., “models,”  
26  
27 174 “frameworks,” “patient engagement,” and “health services research”), was adapted to the syntax  
28  
29 175 used by each database, register, and website, and used Boolean terms. The search strategies for  
30  
31 176 all databases, registers, and websites are found in **Appendix 1**. There were no restrictions on  
32  
33 177 publication dates. Searches of the published and unpublished literature were conducted on July 6,  
34  
35 178 2021 and July 7, 2021, respectively, while backward and forwards searches ended on January 13,  
36  
37 179 2022.  
38  
39  
40  
41  
42  
43

### 44 181 *Selection*

46 182 Search results for the six electronic databases and Google Scholar were imported into a reference  
47  
48 183 management software (Endnote), and duplicate references were removed. Only the first 10 pages  
49  
50 184 of Google Scholar results (n = 100 citations) were imported as advised by an academic librarian  
51  
52 185 (L.D.). One reviewer (A.M.C.) conducted the level 1 (title) screening. The remaining relevant  
53  
54  
55  
56  
57  
58  
59  
60

1  
2  
3 186 references were then imported into an online systematic review production and management  
4  
5 187 software (Covidence; Veritas Health Innovation, Melbourne Australia), where two reviewers  
6  
7 188 (A.M.C. and T.H.) independently conducted the level 2 (abstract) and level 3 (full-text)  
8  
9  
10 189 screening. Potentially relevant literature identified through websites and snowball sampling was  
11  
12 190 screened for inclusion by both reviewers (A.M.C. and T.H.). A third reviewer (A.S.) helped  
13  
14 191 resolve discrepancies at the close of level 2 and 3 screening, which predominantly dealt with  
15  
16  
17 192 whether identified literature focused on health services research.  
18  
19  
20 193

#### 21 194 *Data charting process*

22  
23  
24 195 A standardized data charting (i.e., extraction) form was developed a priori in Microsoft Word by  
25  
26 196 the study team (**Appendix 2**). Items were chosen that described the eligible models and  
27  
28 197 frameworks, as well as provided context, including how and by who the models were developed.  
29  
30  
31 198 Two reviewers (A.M.C. and T.H.) independently extracted information from the final set of  
32  
33 199 included articles using the form. They met with the senior author (A.S) to compare their data  
34  
35 200 after extracting from an initial set of five and ten articles and upon completion of data extraction.  
36  
37  
38 201 Any inconsistencies were resolved through discussion and ultimately referring back to the  
39  
40 202 original article. Further, in two instances <sup>22 23</sup>, the lead author (A.M.C.) contacted the  
41  
42 203 corresponding authors of included frameworks to obtain clarifying information. Consistent with  
43  
44 204 methodological guidelines for scoping reviews, we did not appraise the methodological quality  
45  
46  
47 205 of included articles <sup>15 16</sup>.  
48  
49  
50 206

#### 51 207 *Synthesis of results*

52  
53  
54  
55  
56  
57  
58  
59  
60

208 Data were compiled into a single Microsoft Excel (2019) spreadsheet for synthesis, which  
 209 included both quantitative (i.e., counts) and qualitative (i.e., mapping) analyses. In conducting  
 210 the analyses, the lead author (A.M.C) first immersed herself in the included models and  
 211 frameworks by thoroughly (and repeatedly) reading the associated literature and reviewing  
 212 graphical representations (when available) along with element definitions. With increased  
 213 familiarity, the lead author was able to combine and reframe (where appropriate) similar  
 214 elements found in the original publications. For example, ‘improved quality health decisions’  
 215 and ‘improved patient decision making’ were combined into the element ‘health decision-  
 216 making’ based on similarities in the element names and descriptions provided by the original  
 217 study authors. The revised elements were used to obtain counts of overlapping and diverging  
 218 elements. During this process, it became evident that the elements were organized into similar  
 219 over-arching conceptual categories by the original authors, and that they could also be located  
 220 within multiple domains (**Table 1**). These categories and domains were identified inductively  
 221 during the synthesis exercise. As such, in our analysis, we mapped each element according to  
 222 conceptual category and domain. The validity (i.e., content and face) of the final set of elements  
 223 was established through discussion with this study’s authors. Visual representations of the data  
 224 (i.e., concept maps) were created using Mind Manager 2020 software, version 20.1 (Corel Corp.,  
 225 Austin, T.X.). To support applicability, some elements within the concept maps contain  
 226 clarifying examples in brackets.

227 **Table 1. Explanation of over-arching conceptual categories and domains**

| Over-arching conceptual category | Explanation                                         |
|----------------------------------|-----------------------------------------------------|
| Principles                       | Values that orient and rule the conduct of a group. |



|    |                         |                                                                   |
|----|-------------------------|-------------------------------------------------------------------|
| 1  |                         |                                                                   |
| 2  |                         |                                                                   |
| 3  | Foundational components | Core elements that comprise patient engagement.                   |
| 4  |                         |                                                                   |
| 5  | Contexts                | Resources or decisions that are external to but inform the        |
| 6  |                         | engagement process.                                               |
| 7  |                         |                                                                   |
| 8  |                         |                                                                   |
| 9  |                         |                                                                   |
| 10 | Actions                 | Activities (e.g., behaviors, phases, advisory bodies) involved in |
| 11 |                         | the actual conduct of the engagement and associated research.     |
| 12 |                         |                                                                   |
| 13 |                         |                                                                   |
| 14 | Outcomes                | Results of engagement and its associated research.                |
| 15 |                         |                                                                   |
| 16 |                         |                                                                   |
| 17 | Organizational levels   | Different organizational levels at which engagement may occur     |
| 18 |                         | in a research organization.                                       |
| 19 |                         |                                                                   |
| 20 |                         |                                                                   |
| 21 | <b>Domain</b>           | <b>Elements pertain to...</b>                                     |
| 22 |                         |                                                                   |
| 23 | Intrapersonal           | Individual-level knowledge, perceptions, attitudes, and beliefs.  |
| 24 |                         |                                                                   |
| 25 | Interpersonal           | Relationships with other people.                                  |
| 26 |                         |                                                                   |
| 27 | Process                 | Carrying out the engagement or broader research.                  |
| 28 |                         |                                                                   |
| 29 | Environmental           | Research or organizational policies, cultures, perceptions.       |
| 30 |                         |                                                                   |
| 31 | Health systems and      | Health systems and health outcomes.                               |
| 32 |                         |                                                                   |
| 33 | Outcomes                |                                                                   |
| 34 |                         |                                                                   |
| 35 |                         |                                                                   |
| 36 |                         |                                                                   |
| 37 |                         |                                                                   |

228

### 229 *Patient and public involvement*

230 We engaged two patient co-researchers (R.S. and S.H.), at the level of ‘involve’<sup>24</sup>, in the design  
 231 and conduct of this study. The patient co-researchers and lead author (A.M.C.) arrived at this  
 232 mutual decision at the study’s outset, during the development of a terms of reference that guided  
 233 the study’s engagement process. By ‘involve’ we mean that the lead author worked consistently  
 234 with patient co-researchers to ensure that their ideas and perspectives were understood and  
 235 considered at study milestones. Specifically, patient co-researchers contributed to developing and

1  
2  
3 236 publishing the scoping review protocol <sup>19</sup>, provided feedback on the analyses (including element  
4  
5 237 groupings), provided their perspectives on the interpretation of the study findings, and co-  
6  
7 238 authored this manuscript. In helping shape these stages of the research cycle and related outputs,  
8  
9  
10 239 a notable impact of engagement also included identifying gaps in the current literature relevant to  
11  
12 240 patient partners. The primary methods of engagement were 1-on-1 and small group meetings, as  
13  
14 241 guided by a terms of reference co-developed at the outset of the research partnership. The patient  
15  
16 242 co-researchers will continue to be involved in further knowledge translation activities, like  
17  
18 243 synthesizing the findings for our research group's website  
19  
20 244 ([www.patientengagementinresearch.ca](http://www.patientengagementinresearch.ca)), co-presenting about the engagement process and study  
21  
22 245 findings, and identifying other appropriate methods of dissemination.  
23  
24  
25  
26 246

## 27 28 247 **Results**

### 29 30 248 *Flow of models and frameworks into the study*

31  
32 249 **Appendix 3** displays the flow of eligible articles into the review (PRISMA flow chart). Of the  
33  
34 250 10,840 initially identified citations, 2771 duplicates were excluded. After applying inclusion  
35  
36 251 criteria, 7150 articles were excluded at the title screen, 712 at the abstract screen, and 194 at the  
37  
38 252 full-text screen, leaving 13 models and frameworks. One unpublished framework was then  
39  
40 253 identified through snowball sampling, resulting in a total of 14 models and frameworks included  
41  
42 254 in the review.  
43  
44  
45  
46  
47 255

### 48 49 256 *Characteristics of included articles and models/frameworks*

50  
51 257 Select descriptive characteristics of the included models and frameworks and the articles they  
52  
53 258 were published in (where applicable) are presented in **Appendix 4**. Included articles were  
54  
55  
56  
57  
58  
59  
60

1  
2  
3 259 published between 2012 - 2020 (n = 10 were published in or after 2015) and based in the United  
4  
5 260 States (n = 5), United Kingdom (n = 4), Canada (n = 2), Australia (n = 1) and United Kingdom  
6  
7 261 and Wales (n = 1). The included unpublished framework was developed in Canada as part of the  
8  
9 262 CONNECT project (Caroline Jose, Patricia George-Zwicker, Louise Tardif, Aaron Bouma,  
10  
11 263 Darlene Pugsley, Luke Pugsley, Mathieu Bélanger, Jeffrey Gaudet, Marc Robichaud,  
12  
13 264 CONNECT framework). Models and frameworks were developed in a variety of contexts  
14  
15 265 including organizations (i.e., Patient-Centered Outcomes Research Institute, British Columbia  
16  
17 266 Support Unit, Sunnybrook Hospital, PRIME Centre Wales), medical specialties (i.e., pediatric  
18  
19 267 subspecialty care, palliative care), research disciplines (i.e., healthcare operations research),  
20  
21 268 diseases (i.e., chronic or long-term conditions; cancer; dementia; stroke), and other health  
22  
23 269 conditions (e.g., autistic adults, persons with lived experience of long-term physical and/or  
24  
25 270 mental health illness, parents of children with disabilities). They were developed for general use  
26  
27 271 as well in specific health services research contexts like healthcare operational research, practice-  
28  
29 272 based research and innovation, pragmatic trials, patient-centered outcomes research, and  
30  
31 273 comparative effectiveness research. None targeted a specific component of the research process,  
32  
33 274 and patients were involved in the development of slightly over half (n = 8) of the included  
34  
35 275 models/frameworks. Eight of the models/frameworks took into account the public participation  
36  
37 276 spectrum<sup>24</sup> either explicitly or by including considerations related to control of decision-making  
38  
39 277 and/or directionality of information exchange.  
40  
41  
42  
43  
44  
45  
46  
47  
48

### 49 279 ***Overview of the elements of included models and frameworks***

50  
51 280 A total of 112 elements of patient engagement were identified across the 14 included models and  
52  
53 281 frameworks. Combining and reframing similar elements reduced the total number to 75. Among  
54  
55  
56  
57  
58  
59  
60

1  
2  
3 282 these, 18 elements overlapped across the included models and frameworks and 57 diverged (i.e.,  
4  
5 283 were unique to individual models and frameworks). We present the elements by conceptual  
6  
7 284 category and identify the domains they are situated in below. In considering these results, it  
8  
9  
10 285 should be noted that we placed select elements from the models by Deverka et al. <sup>25</sup> (i.e., inputs,  
11  
12 286 methods, outputs) and Evans et al. <sup>26</sup> (i.e., opportunities for engagement, research environment  
13  
14 287 that actively supports engagement and its underlying principles, resources to support  
15  
16 288 engagement, and system to enhance the breadth of patient and carer experience brought to  
17  
18  
19 289 research activities) in the “actions” conceptual category despite that not being what the original  
20  
21 290 authors labeled them. This is due to the fact that although these elements were uncategorized by  
22  
23  
24 291 Deverka et al. <sup>25</sup>, they closely aligned with the actions category, and Evans et al.’s definition of  
25  
26 292 the conceptual category that encompassed these elements closely aligned with other authors’  
27  
28 293 conceptualization of “actions.”  
29  
30  
31 294

### 32 33 295 *Principles*

34  
35 296 Principles represent the values that orient and rule the conduct of a group. They form the ethical  
36  
37 297 backdrop of engagement <sup>27</sup> and underpin effective collaborative involvement in research <sup>26</sup>. For  
38  
39 298 example, communication, which included mutual communication and feedback, was identified  
40  
41  
42 299 as a core principle of patient engagement by Evans et al. <sup>26</sup>. Figure 1 displays the 13 elements in  
43  
44 300 this conceptual category, as reported by two articles <sup>26 27</sup>. These elements were situated in  
45  
46  
47 301 interpersonal (n = 7), process (n = 5), and environmental (n = 1) domains.  
48  
49 302

### 50 51 303 *Foundational components*

52  
53  
54  
55  
56  
57  
58  
59  
60

1  
2  
3 304 Foundational components represent the core elements that comprise patient engagement in health  
4  
5 305 services research (Figure 2). According to the eight models and frameworks<sup>27-33</sup> represented  
6  
7 306 here, the 26 underlying elements were primarily situated in the process domain (n = 14  
8  
9  
10 307 elements), with the remainder situated in intrapersonal (n = 7), interpersonal (n = 3), and  
11  
12 308 environmental (n = 2) domains.

13  
14 309

### 15 310 *Contexts*

16  
17 311 This conceptual category identifies elements that relate to resources or decisions that are external  
18  
19 312 to but inform the engagement process<sup>34</sup>. Figure 3 presents the four elements in this category, as  
20  
21 313 contributed by one article<sup>34</sup>. Three of the underlying elements resided in the process, and one in  
22  
23 314 the intrapersonal domains.

24  
25 315

### 26 316 *Actions*

27  
28 317 The elements within this category pertain to the activities (e.g., behaviors, phases, advisory  
29  
30 318 bodies) involved in the actual engagement of patients in health services research. Figure 4  
31  
32 319 presents the elements that comprised this category, as reported by six articles<sup>22 25-27 32 34</sup>. These  
33  
34 320 elements were primarily (n = 18) situated in the process domain, with one element in each of  
35  
36 321 intrapersonal and environmental domains, and two elements in the interpersonal domain. As  
37  
38 322 displayed in the top half of elements in the process domain (Figure 4), some of the elements  
39  
40 323 located here were conceptualized in terms of phases of research (i.e., preparatory, execution,  
41  
42 324 translational phases and inputs, methods, outputs).

43  
44 325

### 45 326 *Outcomes*

1  
2  
3 327 Figure 5 presents the elements that comprise the outcomes of patient engagement in health  
4  
5 328 services research, based upon three articles<sup>25 27 34</sup> and the unpublished CONNECT framework.  
6  
7 329 As reflected in the figure, all but the CONNECT framework further organized the elements by  
8  
9  
10 330 time frame (i.e., immediate/near-term, intermediate, and long-term), with three elements (i.e.,  
11  
12 331 health decision-making, research culture, and research outcomes) belonging to two time frames.  
13  
14 332 Overall, this category's elements were primarily situated in the process (n = 11) and health  
15  
16 333 systems and outcomes (n = 8) domains. A further three elements were situated in the  
17  
18 334 intrapersonal, one in the interpersonal, and two in the environmental domains.  
19  
20  
21  
22  
23

335

### 336 *Organizational levels*

26 337 Two articles presented frameworks whose elements captured the organizational levels at which  
27  
28 338 patient engagement in health services research occurred within research centres<sup>23 35</sup>. As  
29  
30 339 displayed in Figure 6, these elements were located in environmental (n = 3) and process (n = 1)  
31  
32 340 domains.  
33  
34

341

## 342 **Discussion**

### 343 *Principal findings*

42 344 Our scoping review identified 14 models and frameworks of patient engagement in health  
43  
44 345 services research, which were comprised of 18 overlapping and 57 diverging elements (n<sub>total</sub>  
45  
46 346 elements = 75). This work represents a novel contribution as, to our knowledge, it is the first to  
47  
48 347 synthesize the literature on models and frameworks of patient engagement in health services  
49  
50 348 research. Our approach to data synthesis is also unique in that we attempt to maximize the  
51  
52 349 intuitiveness and applicability of our findings by presenting elements by overarching conceptual  
53  
54  
55  
56  
57  
58  
59

1  
2  
3 350 categories (i.e., principles, foundational components, contexts, actions, levels, and outcomes) and  
4  
5 351 corresponding domains (i.e., intrapersonal, interpersonal, process, environmental, and health  
6  
7 352 systems and outcomes). We anticipate this approach will facilitate the ready application of our  
8  
9  
10 353 findings to readers' own research programs by serving as a "toolbox" of elements to consider  
11  
12 354 according to the multi-level facets of a research team and study. To illustrate, research partners  
13  
14 355 could begin to meet at a study's outset to co-develop terms of reference that guide the relational  
15  
16 356 and activity related aspects of the study's engagement process. In doing so, they could reflect  
17  
18 357 upon whether/how elements within the domains of each conceptual category resonate with their  
19  
20 358 study's engagement process (as influenced by factors such as the study design, available  
21  
22 359 resources, research partner strengths and interests, etc.) These conversations could be guided by  
23  
24 360 prompts such as "do we want to embody or incorporate this element within our study (why/why  
25  
26 361 not)?", "what does the embodiment or incorporation of this element look and feel like to us?",  
27  
28 362 and "how will we know when we have or have not embodied or incorporated this element within  
29  
30 363 our study?" In doing so, the "toolbox" of elements found within our review is transformed into a  
31  
32 364 co-developed "roadmap" to help guide a study's engagement process.  
33  
34  
35  
36  
37  
38  
39

#### 40 366 ***Strengths and weaknesses of the study***

41  
42 367 Strengths of this study include its scoping review design, which enabled us to gain a broad  
43  
44 368 perspective of the literature on models and frameworks of patient engagement in health services  
45  
46 369 research. Other strengths include (i) a published protocol, (ii) the use of an established  
47  
48 370 methodological framework to guide its design and conduct, (iii) the involvement of an  
49  
50 371 interdisciplinary research team that included patient co-researchers with lived experience of  
51  
52 372 engaging in health services research and other researchers with content expertise in health  
53  
54  
55  
56  
57  
58  
59

1  
2  
3 373 services research and participatory approaches (including patient engagement in research), and  
4  
5 374 (iv) and the co-design of the search strategy with an academic librarian (LD) and the rest of the  
6  
7  
8 375 research team. A weakness of this study concerns the grey boundaries between health services  
9  
10 376 research and other forms of health research, which may have resulted in the inclusion or  
11  
12 377 exclusion of models or frameworks that others could argue do/do not belong in this review. We  
13  
14 378 attempted to minimize this possibility through a screening process that utilized two reviewers  
15  
16 379 (with a third to resolve discrepancies), an a priori agreed upon definition of health services  
17  
18 380 research, and reaching out to study authors for clarification when necessary. Further, the  
19  
20 381 engagement of patient co-researchers in our scoping review at the level of involve limited their  
21  
22 382 opportunities to formally provide insights and expertise to pre-determined study milestones.  
23  
24 383 Engagement at the level of collaborate or empower may have resulted in other insights through  
25  
26 384 more direct contact with the study.  
27  
28  
29  
30  
31  
32

### 33 386 *Comparison with other studies*

34  
35 387 Previous reviews of models, frameworks, and/or other systematic approaches to the engagement  
36  
37 388 of patients and other knowledge users in research had a broader scope<sup>11-13</sup> (albeit only one  
38  
39 389 involved a comprehensive search of multiple databases<sup>11</sup>) and different levels of analyses.  
40  
41 390 Specifically, rather than report underlying elements, Greenhalgh et al. developed a taxonomy for  
42  
43 391 the classification of identified systematic approaches (i.e., tools, frameworks, benchmarks,  
44  
45 392 guidelines, and critical appraisal checklists) based on their primary focus and intended purpose  
46  
47 393 (i.e., power-focused, priority-setting, study-focused, report-focused, partnership-focused)<sup>11</sup>.  
48  
49 394 Innovatively, they piloted co-design workshops that aimed to improve the aesthetic appeal and  
50  
51 395 usability of “best in-class” resources identified through the review. Similar to our questioning of  
52  
53  
54  
55  
56  
57  
58  
59  
60



1  
2  
3 396 the appropriateness of a “one-size fits all” framework, preliminary findings from their co-design  
4  
5 397 workshops indicated that although stakeholders were presented with a common set of resources,  
6  
7 398 they generated widely differing frameworks suited to meet their different needs and purposes.  
9  
10 399 The review by Jull et al. reported 15 high-level concepts for knowledge user engagement in  
11  
12 400 research that they identified through a directed content analysis of underlying elements <sup>13</sup>.  
13  
14 401 Although they organized these concepts across four general research phases (i.e., prepare, plan,  
15  
16 402 conduct, apply), they concluded that variation in the reported concepts between frameworks  
17  
18 403 indicated that research teams should consider the concepts as fluid rather than strictly required.  
19  
20 404 Lastly, the findings of Harrison et al.’s narrative review of frameworks and guidelines  
21  
22 405 culminated in the proposal of an overarching framework that (similar in principle to our scoping  
23  
24 406 review) conceptualized three distinct but inter-related elements of the patient engagement in  
25  
26 407 research process - engagement foundational principles (i.e., domains that original study authors  
27  
28 408 “... considered foundational to patient engagement in research;” n = 15 elements), engagement  
29  
30 409 best practices (i.e., best practice activities to support engagement; n = 25 elements), and research  
31  
32 410 phases where engagement should occur (n = 3 elements) <sup>12</sup>. Taken together, existing reviews  
33  
34 411 demonstrate diversity in how patient engagement in research has been conceptualized through  
35  
36 412 models, frameworks, and other systematic approaches and the approaches used to synthesize  
37  
38 413 their findings.  
39  
40 414  
41  
42  
43  
44

#### 45 415 *The meaning of the study*

46  
47 416 Our findings indicate that the conceptualization of patient engagement in health services research  
48  
49 417 varies between existing models and frameworks. Although models and frameworks posit to  
50  
51 418 break down a concept into its base components (which implies the existence of convergence  
52  
53  
54  
55  
56  
57  
58  
59  
60

1  
2  
3 419 among underlying elements), this finding is not surprising as patient engagement is an *approach*  
4  
5 420 to research rather than a *method*. Contributing to the heterogeneity among identified elements is  
6  
7 421 the diversity in the populations, contexts, and approaches used to develop the models and  
8  
9 422 frameworks, which also emphasizes the importance of avoiding a “one size fits all” approach to  
10  
11 423 engagement. Perhaps congruence between models and frameworks actually exists at the level of  
12  
13 424 conceptual categories. These could be taken to represent the essential components of patient  
14  
15 425 engagement in health services research. The elements that underlie them, as identified across the  
16  
17 426 various models and frameworks, would then serve as considerations for researchers and patient  
18  
19 427 co-researchers when planning and operationalizing patient engagement in health services  
20  
21 428 research. For this to be better developed from the current literature, consensus is needed on the  
22  
23 429 definitions of the underlying categories, followed by some re-shuffling of the elements across the  
24  
25 430 conceptual categories in order to align with the agreed upon definitions.  
26  
27  
28  
29  
30  
31  
32

### 33 432 ***Unanswered questions and future research***

34  
35 433 In sum, our study found that there is little overlap between the elements that comprise existing  
36  
37 434 models and frameworks of patient engagement in health services research. Readers seeking to  
38  
39 435 apply our findings to their own engaged work should consider the “fit” of each element, by  
40  
41 436 conceptual category and domain, within the context of their study. Future research that builds  
42  
43 437 upon our work should consider addressing three major gaps. First, most existing models and  
44  
45 438 frameworks identified factors that needed improvement for patient co-researchers to be better  
46  
47 439 research partners, with a lot less consideration paid to factors that needed improvement for  
48  
49 440 academic co-researchers to be better research partners. This may be in large part due to the fact  
50  
51 441 the majority of the models were written from an academic researcher lens (as evidenced, for  
52  
53  
54  
55  
56  
57  
58  
59  
60

1  
2  
3 442 example, by the fact that only a third of the included models and frameworks stated that they  
4  
5 443 involved patients in their development). Second, there is a lack of focus on the intrapersonal  
6  
7 444 domain of engagement, including the “soft skills” that underlie interpersonal interactions and  
8  
9 445 relationships (e.g., body language, wording, tone), and the environmental domain of engagement  
10  
11 446 which shapes the context in which engagement is set. Third, patient co-researchers are not just  
12  
13 447 “patients” that can be lumped into a single homogenous category. They are people with different  
14  
15 448 backgrounds, skills, and interests extending beyond their health conditions or needs. Thus, it is  
16  
17 449 important to incorporate a trauma-informed and intersectional approach that acknowledges and  
18  
19 450 promotes an understanding of human beings as shaped by the interactions of different social  
20  
21 451 locations and experiences<sup>36</sup>. Relatedly, it is important for patient co-researchers and academic  
22  
23 452 researchers to get to know each other as people, instead of making assumptions (including about  
24  
25 453 a patient co-researcher’s experience with healthcare services). Engagement is as much about  
26  
27 454 relational interactions as it is research processes. Careful attention needs to be paid to both for  
28  
29 455 academic-patient co-researcher relationships to thrive.  
30  
31  
32  
33  
34  
35  
36  
37  
38  
39  
40  
41

42 459 **Funding:** This work was supported by a grant from the University Collaborative Research  
43  
44 460 Program (University of Manitoba), grant number 50664. The patient engagement activities were  
45  
46 461 supported by the George and Fay Yee Centre for Health Innovation (CHI) Patient and Public  
47  
48 462 Engagement Award (CHI), grant number 49876. Dr. Chudyk’s postdoctoral fellowship is  
49  
50 463 supported by the Canadian Institute of Health Research’s Patient-Oriented Research Awards -  
51  
52  
53  
54  
55  
56  
57  
58  
59  
60

1  
2  
3 464 Transition to Leadership Stream award, grant number 170670. The research team had full  
4  
5 465 autonomy in all aspects of the study.  
6  
7  
8 466

9  
10 467 **Competing interests:** None declared.  
11  
12 468

13  
14 469 **Contributors:** A.M.C and A.S. were responsible for all major areas of concept development,  
15  
16 470 study planning, and manuscript writing. In addition, A.M.C. was also responsible for data  
17  
18 471 collection and analysis. T.H., L.D., C.S., R.S., and S.H. were responsible for all major areas of  
19  
20 472 concept development and study planning, were consulted on the data analysis and its  
21  
22 473 interpretation, and provided manuscript edits. In addition, T.H. was responsible for data  
23  
24 474 collection. C.W. led concept development but passed away prior to the completion of the  
25  
26 475 manuscript.  
27  
28  
29

30 476  
31  
32 477 **Acknowledgments:** We offer our sincerest thanks to Mr. Patrick Faucher for designing our  
33  
34 478 figures, and to the Manitoba SPOR Support Unit (George & Fay Yee Centre for Healthcare  
35  
36 479 Innovation) for Mr. Faucher's services.  
37  
38  
39

40 480  
41  
42 481 **Data availability statement:** Data are available upon reasonable request to the corresponding  
43  
44 482 author.  
45  
46

47 483  
48  
49 484 **Ethics statements**

50  
51 485 **Patient consent for publication:** Not applicable.  
52  
53  
54  
55  
56  
57  
58  
59  
60

1  
2  
3 486 **Ethics approval:** This paper synthesized publicly available articles and therefore did not require  
4  
5 487 ethical approval.  
6

7  
8 488  
9  
10 489 **Exclusive license statement:** I, the Submitting Author have the right to grant and do grant on  
11  
12 490 behalf of all authors of the Work (as defined in the below author licence), an exclusive licence  
13  
14 491 and/or a non-exclusive licence for contributions from authors who are: i) UK Crown employees;  
15  
16 492 ii) where BMJ has agreed a CC-BY licence shall apply, and/or iii) in accordance with the terms  
17  
18 493 applicable for US Federal Government officers or employees acting as part of their official  
19  
20 494 duties; on a worldwide, perpetual, irrevocable, royalty-free basis to BMJ Publishing Group Ltd  
21  
22 495 (“BMJ”) its licensees and where the relevant Journal is co-owned by BMJ to the co-owners of  
23  
24 496 the Journal, to publish the Work in BMJ Open and any other BMJ products and to exploit all  
25  
26 497 rights, as set out in our licence.  
27  
28  
29

30 498  
31  
32  
33 499 I, the Submitting Author, accept and understand that any supply made under these terms is made  
34  
35 500 by BMJ to the Submitting Author unless I am acting as an employee on behalf of my employer  
36  
37 501 or a postgraduate student of an affiliated institution which is paying any applicable article  
38  
39 502 publishing charge (“APC”) for Open Access articles. Where the Submitting Author wishes to  
40  
41 503 make the Work available on an Open Access basis (and intends to pay the relevant APC), the  
42  
43 504 terms of reuse of such Open Access shall be governed by a Creative Commons licence – details  
44  
45 505 of these licences and which Creative Commons licence will apply to this Work are set out in our  
46  
47 506 licence referred to above.  
48  
49  
50  
51  
52  
53  
54  
55  
56  
57  
58  
59  
60

1  
2  
3 **508 References**  
4

- 5 509 1. Strategy for Patient-Oriented Research - Patient Engagement Framework; 2014.  
6  
7  
8 510 2. Allen ML, Salsberg J, Knot M, et al. Engaging with communities, engaging with patients:  
9  
10 511 amendment to the NAPCRG 1998 Policy Statement on Responsible Research With  
11  
12 512 Communities. *Fam Pract* 2017;34(3):313-21. doi: 10.1093/fampra/cmw074 [published  
13  
14 513 Online First: 2016/08/21]  
15  
16  
17 514 3. Lewin K. Frontiers in group dynamics: II. Channels of group life; social planning and action  
18  
19 515 research. *Human relations* 1947;1(2):143-53.  
20  
21  
22 516 4. Freire P. Pedagogy of the oppressed, New York (Herder & Herder) 1970. 1970  
23  
24 517 5. Domecq JP, Prutsky G, Elraiyah T, et al. Patient engagement in research: a systematic review.  
25  
26 518 *BMC Health Serv Res* 2014;14:89. doi: 10.1186/1472-6963-14-89 [published Online  
27  
28 519 First: 2014/02/27]  
29  
30  
31 520 6. Manafo E, Petermann L, Mason-Lai P, et al. Patient engagement in Canada: a scoping review  
32  
33 521 of the 'how' and 'what' of patient engagement in health research. *Health Res Policy Syst*  
34  
35 522 2018;16(1):5. doi: 10.1186/s12961-018-0282-4 [published Online First: 2018/02/09]  
36  
37  
38 523 7. Boote J, Baird W, Beecroft C. Public involvement at the design stage of primary health  
39  
40 524 research: a narrative review of case examples. *Health Policy* 2010;95(1):10-23. doi:  
41  
42 525 10.1016/j.healthpol.2009.11.007  
43  
44  
45 526 8. Carroll SL, Embuldeniya G, Abelson J, et al. Questioning patient engagement: research  
46  
47 527 scientists' perceptions of the challenges of patient engagement in a cardiovascular  
48  
49 528 research network. *Patient Prefer Adherence* 2017;11:1573-83. doi:  
50  
51 529 10.2147/PPA.S135457  
52  
53  
54  
55  
56  
57  
58  
59  
60

- 1  
2  
3 530 9. Crockett LK, Shimmin C, Wittmeier K, et al. Engaging patients and the public in Health  
4  
5 531 Research: experiences, perceptions and training needs among Manitoba health  
6  
7 532 researchers. *Res Involv Engagem* 2019;5:28. doi: 10.1186/s40900-019-0162-2 [published  
8  
9 533 Online First: 2019/10/15]  
10  
11  
12 534 10. Van der Riet M, Boettiger M. Shifting research dynamics: Addressing power and maximising  
13  
14 535 participation through participatory research techniques in participatory research. *South*  
15  
16 536 *African Journal of Psychology* 2009;39(1):1-18.  
17  
18  
19 537 11. Greenhalgh T, Hinton L, Finlay T, et al. Frameworks for supporting patient and public  
20  
21 538 involvement in research: Systematic review and co-design pilot. *Health Expect*  
22  
23 539 2019;22(4):785-801. doi: 10.1111/hex.12888 [published Online First: 2019/04/24]  
24  
25  
26 540 12. Harrison JD, Auerbach AD, Anderson W, et al. Patient stakeholder engagement in research:  
27  
28 541 A narrative review to describe foundational principles and best practice activities. *Health*  
29  
30 542 *Expect* 2019;22(3):307-16. doi: 10.1111/hex.12873 [published Online First: 2019/02/15]  
31  
32  
33 543 13. Jull JE, Davidson L, Dungan R, et al. A review and synthesis of frameworks for engagement  
34  
35 544 in health research to identify concepts of knowledge user engagement. *BMC Med Res*  
36  
37 545 *Methodol* 2019;19(1):211. doi: 10.1186/s12874-019-0838-1 [published Online First:  
38  
39 546 2019/11/23]  
40  
41  
42 547 14. Canadian Institutes of Health Services Research. Ethical Considerations About Health  
43  
44 548 Research [Available from: <http://www.cihr-irsc.gc.ca/e/48801.html> accessed August 5,  
45  
46 549 2021].  
47  
48  
49 550 15. Colquhoun HL, Levac D, O'Brien KK, et al. Scoping reviews: time for clarity in definition,  
50  
51 551 methods, and reporting. *Journal of Clinical Epidemiology* 2014;67:1291-94. doi:  
52  
53 552 10.1016/j.jclinepi.2014.03.013  
54  
55  
56  
57  
58  
59  
60

- 1  
2  
3 553 16. Munn Z, Peters MD, Stern C, et al. Systematic review or scoping review? Guidance for  
4  
5 554 authors when choosing between a systematic or scoping review approach. *BMC medical*  
6  
7 555 *research methodology* 2018;18(1):143.  
8  
9  
10 556 17. Arksey H, O'Malley L. Scoping studies: towards a methodological framework. *International*  
11  
12 557 *Journal of Social Research Methodology* 2005;8:19-32. doi:  
13  
14 558 10.1080/1364557032000119616  
15  
16  
17 559 18. Levac D, Colquhoun H, O'Brien KK. Scoping studies: advancing the methodology.  
18  
19 560 *Implementation Science* 2010;5:69. doi: 10.1186/1748-5908-5-69  
20  
21  
22 561 19. Chudyk AM, Waldman C, Horrill T, et al. Models and frameworks of patient engagement in  
23  
24 562 health services research: a scoping review protocol. *Research involvement and*  
25  
26 563 *engagement* 2018;4(1):28.  
27  
28 564 20. Tricco AC, Lillie E, Zarin W, et al. PRISMA extension for scoping reviews (PRISMA-ScR):  
29  
30 565 checklist and explanation. *Annals of internal medicine* 2018;169(7):467-73.  
31  
32  
33 566 21. Staniszewska S, Brett J, Simera I, et al. GRIPP2 reporting checklists: tools to improve  
34  
35 567 reporting of patient and public involvement in research. *BMJ* 2017;358:j3453. doi:  
36  
37 568 10.1136/bmj.j3453 [published Online First: 2017/08/05]  
38  
39  
40 569 22. Holmes BJ, Bryan S, Ho K, et al. Engaging patients as partners in health research: Lessons  
41  
42 570 from BC, Canada. *Healthcare Management Forum* 2018;31(2):41-44. doi:  
43  
44 571 10.1177/0840470417741712  
45  
46  
47 572 23. Evans BA, Gallanders J, Griffiths L, et al. Public involvement and engagement in primary  
48  
49 573 and emergency care research: the story from PRIME Centre Wales. *International Journal*  
50  
51 574 *of Population Data Science* 2020;5(3)  
52  
53  
54  
55  
56  
57  
58  
59  
60



- 1  
2  
3 575 24. IAP2 International Federation for Public Participation. Public Participation Spectrum. *IAP2*  
4  
5 576 *Public Participation Spectrum* 2014:1.  
6  
7  
8 577 25. Deverka PA, Lavalley DC, Desai PJ, et al. Stakeholder participation in comparative  
9  
10 578 effectiveness research: defining a framework for effective engagement. *Journal of*  
11  
12 579 *comparative effectiveness research* 2012;1(2):181-94.  
13  
14  
15 580 26. Evans BA, Porter A, Snooks H, et al. A co-produced method to involve service users in  
16  
17 581 research: the SUCCESS model. *BMC medical research methodology* 2019;19(1):34.  
18  
19 582 27. Frank L, Forsythe L, Ellis L, et al. Conceptual and practical foundations of patient  
20  
21 583 engagement in research at the patient-centered outcomes research institute. *Quality of*  
22  
23 584 *Life Research* 2015;24(5):1033-41.  
24  
25  
26 585 28. Daveson BA, de Wolf-Linder S, Witt J, et al. Results of a transparent expert consultation on  
27  
28 586 patient and public involvement in palliative care research. *Palliative medicine*  
29  
30 587 2015;29(10):939-49.  
31  
32  
33 588 29. Gesell SB, Klein KP, Halladay J, et al. Methods guiding stakeholder engagement in planning  
34  
35 589 a pragmatic study on changing stroke systems of care. *Journal of clinical and*  
36  
37 590 *translational science* 2017;1(2):121-28.  
38  
39  
40 591 30. Gibson A, Welsman J, Britten N. Evaluating patient and public involvement in health  
41  
42 592 research: from theoretical model to practical workshop. *Health Expectations*  
43  
44 593 2017;20(5):826-35.  
45  
46  
47 594 31. Pearson M, Monks T, Gibson A, et al. Involving patients and the public in healthcare  
48  
49 595 operational research—The challenges and opportunities. *Operations Research for Health*  
50  
51 596 *Care* 2013;2(4):86-89.  
52  
53  
54  
55  
56  
57  
58  
59  
60

- 1  
2  
3 597 32. Shippee ND, Domecq Garces JP, Prutsky Lopez GJ, et al. Patient and service user  
4  
5 598 engagement in research: a systematic review and synthesized framework. *Health*  
6  
7 599 *Expectations* 2015;18(5):1151-66.
- 10 600 33. Goeman DP, Corlis M, Swaffer K, et al. Partnering with people with dementia and their care  
11  
12 601 partners, aged care service experts, policymakers and academics: A co-design process.  
13  
14 602 *Australasian journal on ageing* 2019;38:53-58.
- 17 603 34. Ray KN, Miller E. Strengthening stakeholder-engaged research and research on stakeholder  
18  
19 604 engagement. *Journal of comparative effectiveness research* 2017;6(4):375-89.
- 21 605 35. Ruco A, Nichol K. Patient engagement in research and innovation: a new framework.  
22  
23 606 *Journal of medical imaging and radiation sciences* 2016;47(4):290-93.
- 26 607 36. Shimmin C, Wittmeier KDM, Lavoie JG, et al. Moving towards a more inclusive patient and  
27  
28 608 public involvement in health research paradigm: the incorporation of a trauma-informed  
29  
30 609 intersectional analysis. *BMC Health Services Research* 2017;17(1):539. doi:  
31  
32 610 10.1186/s12913-017-2463-1

33  
34  
35  
36  
37  
38  
39  
40 613 **FIGURE TITLES**

41  
42 614 **Figure 1. Concept map – principles of patient engagement in health services research**

43  
44 615 **Figure 2. Concept map – foundational components of patient engagement in health services**  
45  
46 616 **research**

47  
48  
49 617 **Figure 3. Concept map – contexts of patient engagement in health services research**

50  
51 618 **Figure 4. Concept map – actions of patient engagement in health services research**

52  
53 619 **Figure 5. Concept map – outcomes of patient engagement in health services research**

1  
2  
3  
4  
5  
6  
7  
8  
9  
10  
11  
12  
13  
14  
15  
16  
17  
18  
19  
20  
21  
22  
23  
24  
25  
26  
27  
28  
29  
30  
31  
32  
33  
34  
35  
36  
37  
38  
39  
40  
41  
42  
43  
44  
45  
46  
47  
48  
49  
50  
51  
52  
53  
54  
55  
56  
57  
58  
59  
60

620 **Figure 6. Concept map – organizational levels of patient engagement in health services**  
621 **research**

For peer review only

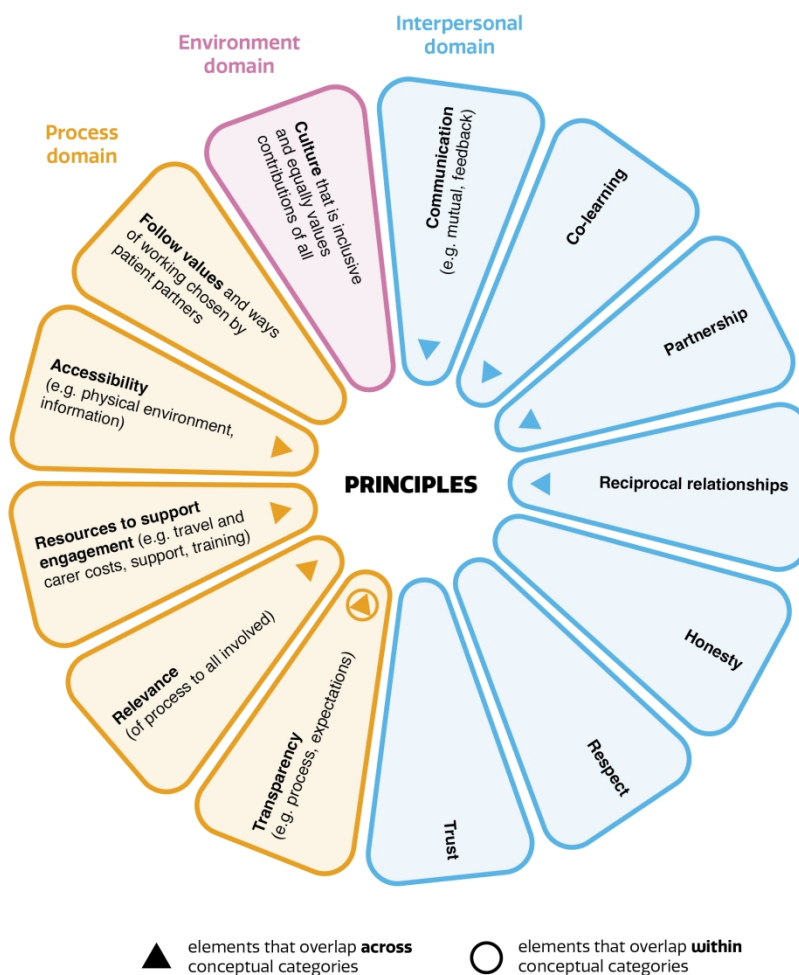

Figure 1. Concept map – principles of patient engagement in health services research

548x580mm (118 x 118 DPI)

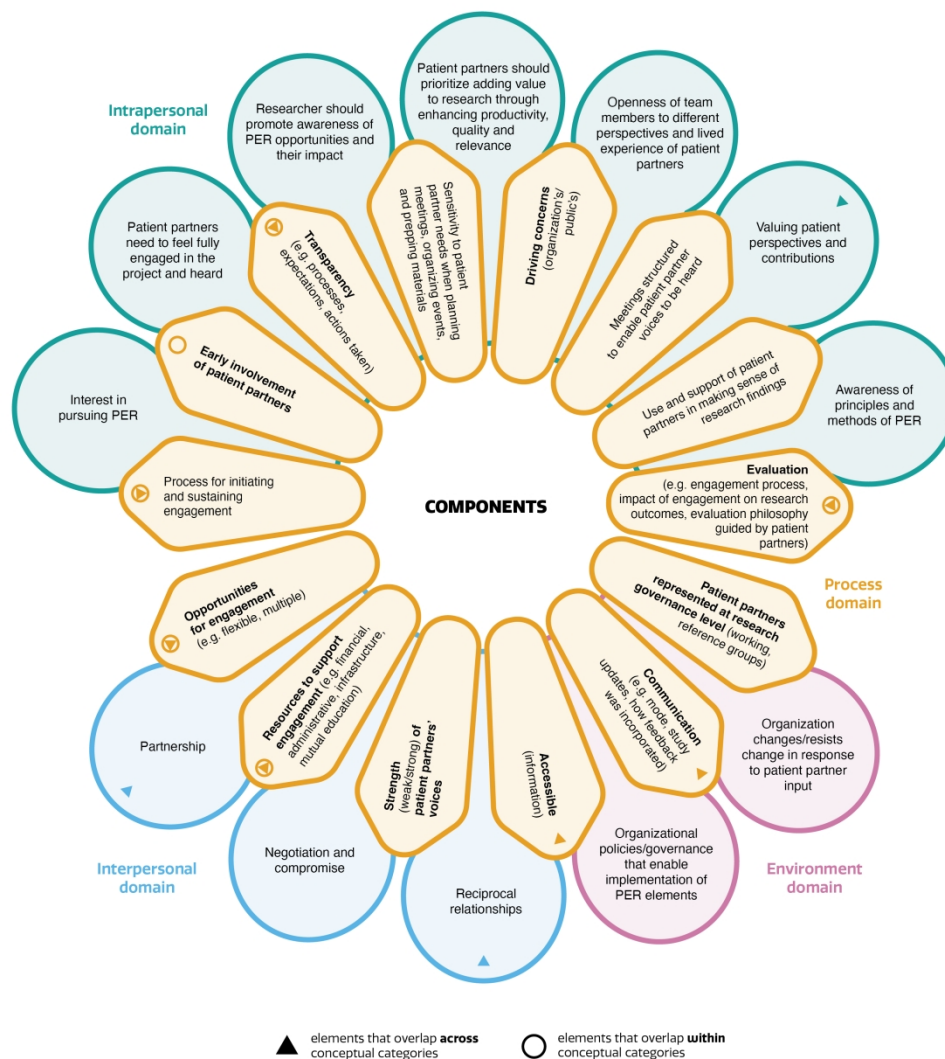

Figure 2. Concept map – foundational components of patient engagement in health services research

696x773mm (118 x 118 DPI)

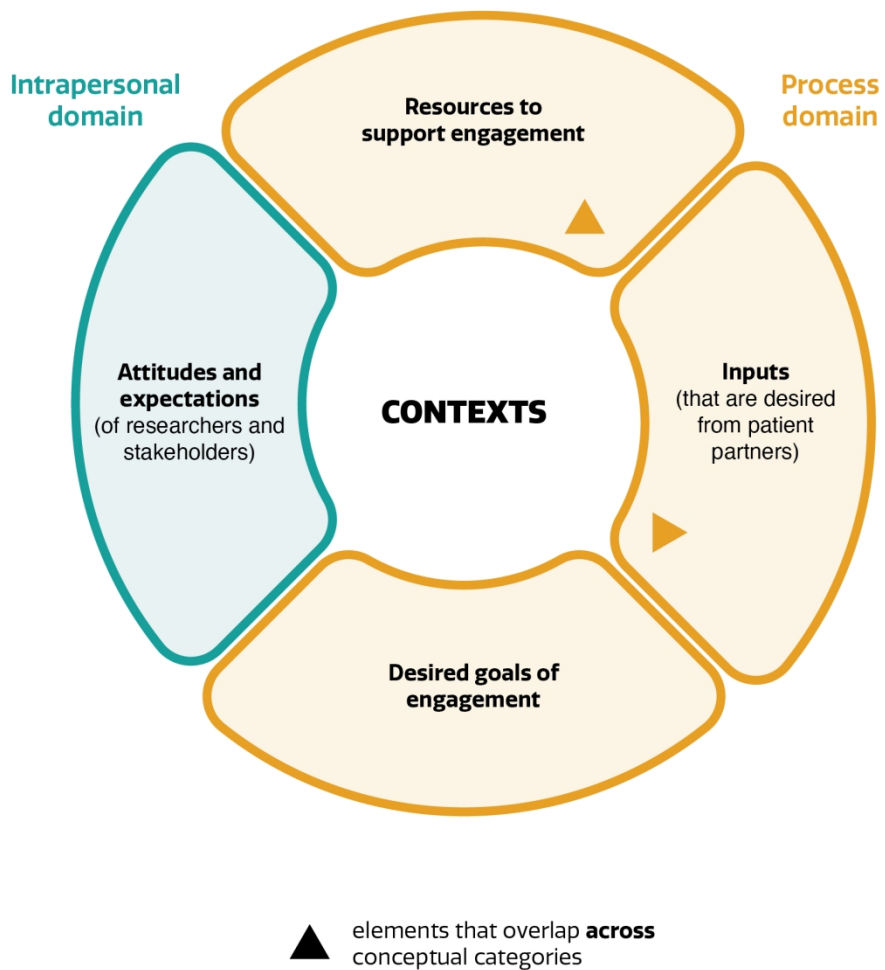

Figure 3. Concept map – contexts of patient engagement in health services research

406x436mm (118 x 118 DPI)

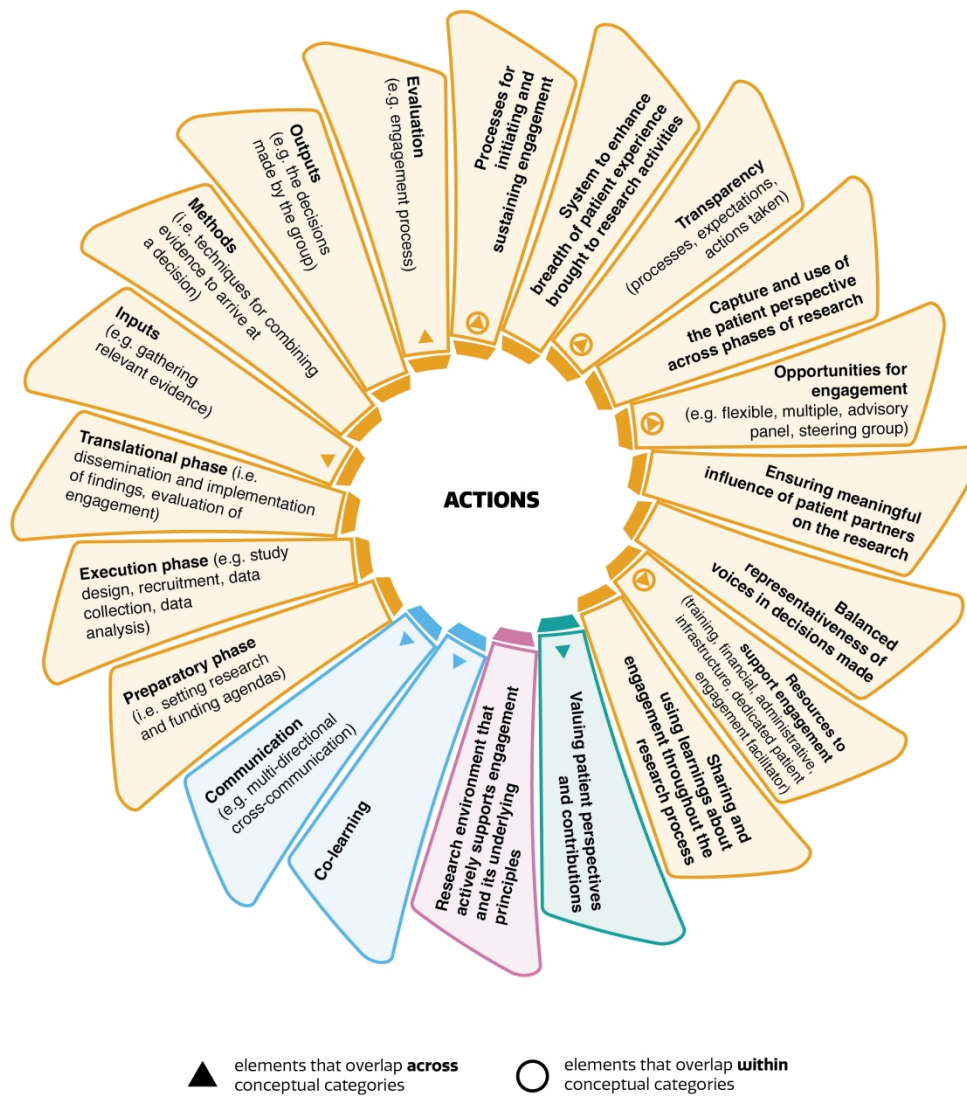

Figure 4. Concept map – actions of patient engagement in health services research

548x656mm (118 x 118 DPI)

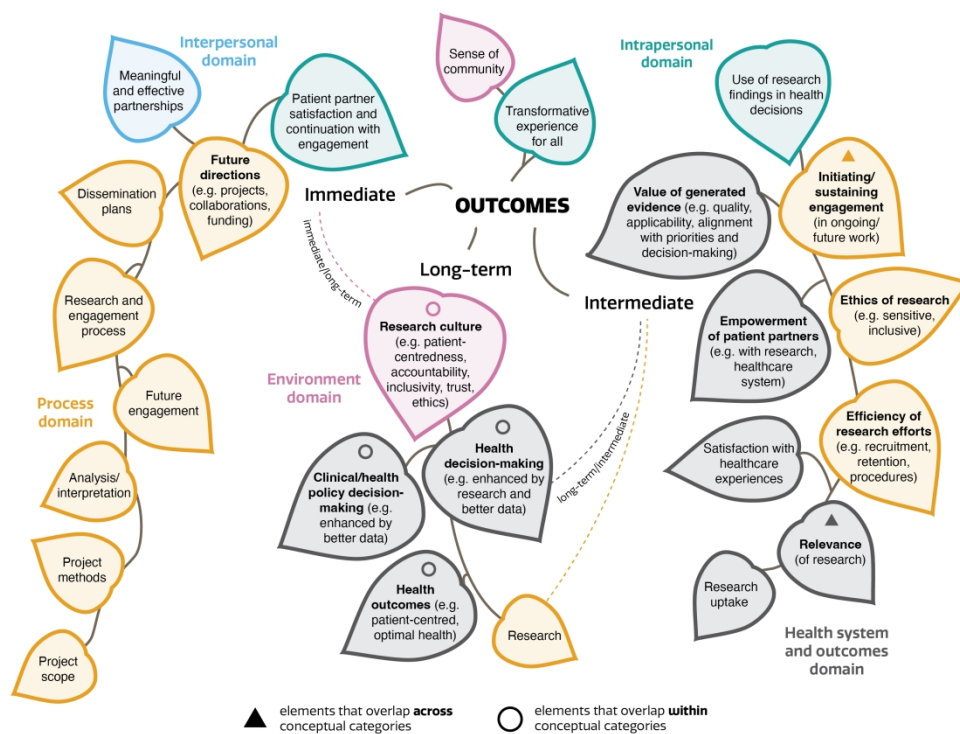

Figure 5. Concept map – outcomes of patient engagement in health services research

710x549mm (118 x 118 DPI)



1  
2  
3  
4  
5  
6  
7  
8  
9  
10  
11  
12  
13  
14  
15  
16  
17  
18  
19  
20  
21  
22  
23  
24  
25  
26  
27  
28  
29  
30  
31  
32  
33  
34  
35  
36  
37  
38  
39  
40  
41  
42  
43  
44  
45  
46  
47  
48  
49  
50  
51  
52  
53  
54  
55  
56  
57  
58  
59  
60

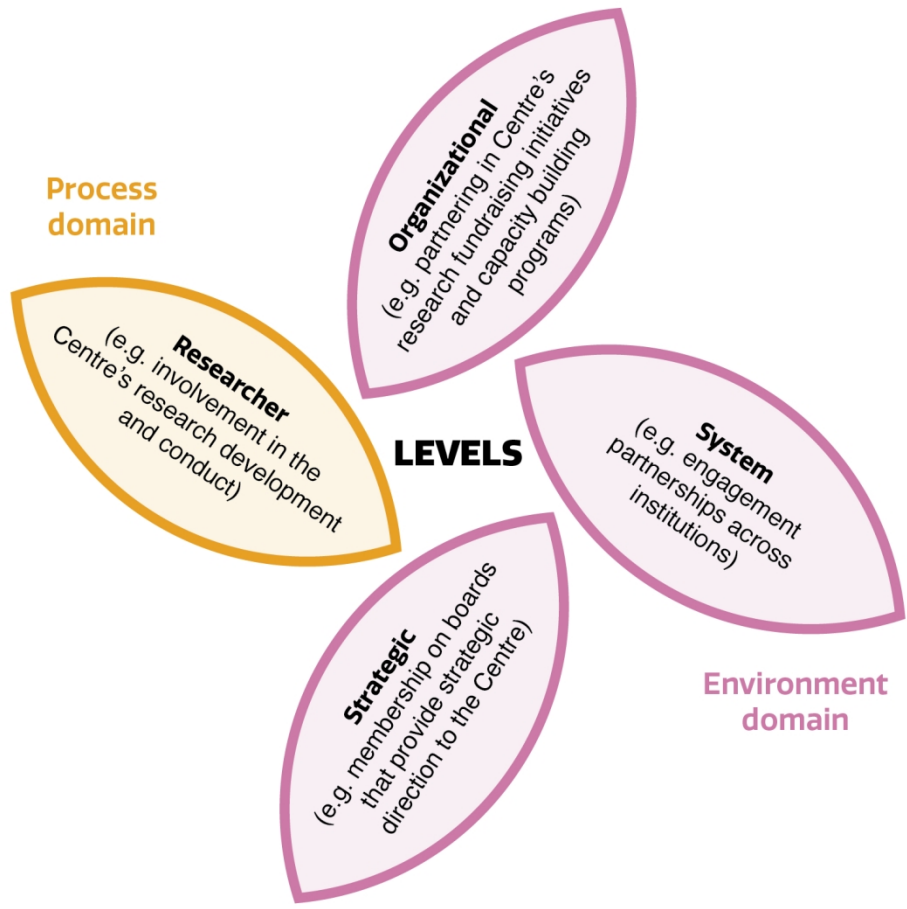

Figure 6. Concept map – organizational levels of patient engagement in health services research

360x373mm (118 x 118 DPI)

## Appendix 1 –Search strategies for all databases, registers, and websites

### CINAHL

1. (patient\* n3 engag\*) OR “patient oriented research”
2. model OR models OR framework\* OR (MH “Conceptual Framework”) OR (MH “Models, Theoretical”)
3. research
4. “patient and public involvement” OR “patient involvement” or “stakeholder engagement”
5. S1 OR S4
6. S2 AND S3 AND S5

### Cochrane Database of Systematic Reviews

“patient engagement” OR “patient oriented research” OR “patient and public involvement” OR “patient involvement” OR “stakeholder engagement” in Title Abstract Keyword

### Joanna Briggs Institute Evidence Based Practice Database

(“patient engagement” OR “patient oriented research” OR “patient and public involvement” OR “patient involvement” OR “stakeholder engagement”).mp.

### MEDLINE (Ovid)

1. Patient Participation/
2. models, theoretical/ or patient-specific modeling/
3. (patient\* adj3 engag\*).mp.
4. (model or models or framework\*).mp.
5. research.mp.
6. ("patient oriented research" or "patient and public involvement" or "patient involvement" or "stakeholder engagement").mp.
7. 1 or 3 or 6
8. 2 or 4
9. 5 and 7 and 8

### Scopus

((TITLE-ABS-KEY (patient\* W/3 engag\*)) OR (TITLE-ABS-KEY (“patient oriented research”))) OR (TITLE-ABS-KEY (“patient and public involvement”)) OR (TITLE-ABS-KEY (“patient involvement”)) OR (TITLE-ABS-KEY (“stakeholder engagement”))) AND (TITLE-ABS-KEY (model or models or framework\*)) AND (TITLE-ABS-KEY (research))

## PsycINFO

1. Client Participation/
2. Models/
3. (patient\* adj3 engag\*).mp.
4. (model OR models OR framework\*).mp.
5. research.mp.
6. (“patient oriented research” OR “patient and public involvement” OR “patient involvement” or “stakeholder engagement”).mp.
7. 1 OR 3 OR 6
8. 2 OR 4
9. 5 AND 7 AND 8

## Web of Science - Conference Proceedings Citation Index

(TS=(patient\* NEAR/3 engag\*) OR (TS=( "patient oriented research" OR "patient and public involvement" OR "patient involvement" OR "stakeholder engagement" ) ) ) AND ( TS=(model OR models OR framework\* ) ) AND ( TS=( research ) )

## Google Scholar

("patient engagement" OR "patient oriented research" OR “patient and public involvement” OR “patient involvement” OR “stakeholder engagement”) AND (model or framework) AND research

## Conference Proceedings Citation Index

(TS=(patient\* NEAR/3 engag\*) OR (TS=( "patient oriented research" OR "patient and public involvement" OR "patient involvement" OR "stakeholder engagement" ) ) ) AND ( TS=(model OR models OR framework\* ) ) AND ( TS=( research ) )

## ProQuest Dissertations & Theses

noft((patient\* near/3 engag\*) OR "patient oriented research" OR "patient and public involvement" OR "patient involvement" OR "stakeholder engagement") AND noft(model OR models OR framework\*) AND noft(research)

## Google and websites

(model OR framework) AND “health services research”

## Appendix 2 – Standardized data extraction form

### Notes on using a data extraction form:

- Be consistent in the order and style you use to describe the information for each report.
- Record any missing information as unclear or not described, to make it clear that the information was not found in the study report(s), not that you forgot to extract it.
- Include any instructions and decision rules on the data collection form, or in an accompanying document. It is important to practice using the form and give training to any other authors using the form.

### Decision rules

- Only include models and framework that are explicitly labelled by study authors as such

### General Information

|                                              |  |
|----------------------------------------------|--|
| Date form completed<br>( <i>dd/mm/yyyy</i> ) |  |
| Name of data extractor                       |  |
|                                              |  |

### Study authors (characteristics of)

|                                                                  | <b>Descriptions as stated in report/paper or note otherwise</b> | <b>Location in text or source</b> ( <i>pg &amp; ¶/fig/table/other</i> ) |
|------------------------------------------------------------------|-----------------------------------------------------------------|-------------------------------------------------------------------------|
| <b>Author last names</b>                                         |                                                                 |                                                                         |
| <b>Country</b> ( <i>of authors' institutional affiliations</i> ) |                                                                 |                                                                         |

|                                                                                            |  |  |
|--------------------------------------------------------------------------------------------|--|--|
| <b>Lens of authors</b><br><i>(by individuals,<br/> cluster/ groups or<br/> body parts)</i> |  |  |
| <b>Notes:</b>                                                                              |  |  |

Publication (characteristics of)

|                            | <b>Descriptions as stated in report/paper or note<br/> otherwise</b> | <b>Location in text<br/> or source</b> <i>(pg &amp;<br/> ¶/fig/table/other<br/> )</i> |
|----------------------------|----------------------------------------------------------------------|---------------------------------------------------------------------------------------|
| <b>Study name</b>          |                                                                      |                                                                                       |
| <b>Publication year</b>    |                                                                      |                                                                                       |
| <b>Journal</b>             |                                                                      |                                                                                       |
| <b>Is study published?</b> | <b>Yes</b> <b>No</b>                                                 |                                                                                       |
| <b>Notes:</b>              |                                                                      |                                                                                       |

Model/framework (characteristics of)

|                                            | <b>Descriptions as stated in report/paper or note<br/> otherwise</b> | <b>Location in text<br/> or source</b> <i>(pg &amp;<br/> ¶/fig/table/other<br/> )</i> |
|--------------------------------------------|----------------------------------------------------------------------|---------------------------------------------------------------------------------------|
| <b>Name of<br/> model/framework</b>        |                                                                      |                                                                                       |
| <b>Purpose/aim of<br/> model/framework</b> |                                                                      |                                                                                       |

|                                                              | <b>Descriptions as stated in report/paper or note otherwise</b> | <b>Location in text or source</b> ( <i>pg &amp; ¶/fig/table/other</i> ) |
|--------------------------------------------------------------|-----------------------------------------------------------------|-------------------------------------------------------------------------|
| <b>Population developed in/for</b>                           |                                                                 |                                                                         |
| <b>Methods used to develop m/f?</b>                          |                                                                 |                                                                         |
| <b>Patients involved in m/f development (and if so how)?</b> |                                                                 |                                                                         |
| <b>Targeted stage of research process</b>                    |                                                                 |                                                                         |
| <b>Elements (description)</b>                                |                                                                 |                                                                         |
| <b>Proposed relations between elements</b>                   |                                                                 |                                                                         |
| <b>Location on spectrum of engagement</b>                    |                                                                 |                                                                         |
| <b>Strs/weaknesses of model/framework (stated in study)</b>  |                                                                 |                                                                         |
| <b>Notes:</b>                                                |                                                                 |                                                                         |

Model/framework (figure presented in text)

## Definitions

|                          |                                                                                                                                                                                                                                                                                                                                                                                                                                                   |
|--------------------------|---------------------------------------------------------------------------------------------------------------------------------------------------------------------------------------------------------------------------------------------------------------------------------------------------------------------------------------------------------------------------------------------------------------------------------------------------|
| Model                    | A descriptive and deliberate simplification of a phenomenon or an aspect of a phenomenon                                                                                                                                                                                                                                                                                                                                                          |
| Framework                | A shared orientation for studying, explaining, and understanding phenomena of interest through the description and identification of the universal elements underlying a phenomenon of interest                                                                                                                                                                                                                                                   |
| Patient engagement       | Meaningful and active collaboration of patients in research governance, priority setting, conduct, and knowledge translation                                                                                                                                                                                                                                                                                                                      |
| Health services research | The study of how social factors, financing systems, organizational structures and processes, health technologies, and personal behaviours affect access to health care, the quality and cost of health care, and, ultimately, the population's health and well-being. It includes research with the goal of improving the efficiency and effectiveness of health professionals and the health care system, through changes to practice and policy |

## Inclusion/exclusion criteria

| Inclusion                                      | Exclusion                                                                                                                                                                                                                                                                                                                                                                                   |
|------------------------------------------------|---------------------------------------------------------------------------------------------------------------------------------------------------------------------------------------------------------------------------------------------------------------------------------------------------------------------------------------------------------------------------------------------|
| Published or unpublished model or framework of | Models/frameworks not focused on health services research, such as those related to: <ul style="list-style-type: none"> <li>• clinical decision-making/practice,</li> <li>• active role of patients in health management,</li> <li>• therapeutic engagement,</li> <li>• understanding disease experience</li> <li>• technology engagement</li> <li>• the pharmaceutical industry</li> </ul> |
| Patient engagement in                          | Not written in English                                                                                                                                                                                                                                                                                                                                                                      |
| Health services research                       | Unavailable as full-text                                                                                                                                                                                                                                                                                                                                                                    |

## Appendix 3 – PRISMA diagram





## Appendix 4. Select characteristics of included articles and/or models and frameworks

| Article                                         | Characteristics of the ...                         |                                                                                                                                                     |                                                                                                                                                                              |                                                                                                                                             |
|-------------------------------------------------|----------------------------------------------------|-----------------------------------------------------------------------------------------------------------------------------------------------------|------------------------------------------------------------------------------------------------------------------------------------------------------------------------------|---------------------------------------------------------------------------------------------------------------------------------------------|
|                                                 | Model/framework                                    |                                                                                                                                                     |                                                                                                                                                                              |                                                                                                                                             |
| First author/<br>reference/<br>country/<br>year | Name                                               | Purpose                                                                                                                                             | Methods of<br>development                                                                                                                                                    | Were patient co-<br>researchers involved<br>in its development<br>(yes/no/not specified –<br>population)                                    |
| Daveson/<br>28 /<br>UK/<br>2015                 | Not specified                                      | An optimal involvement model that fulfills the needs of both users and researchers while acknowledging any potential diversity between these groups | Consultation workshop attended by patients and caregivers                                                                                                                    | Yes – patients actively involved in Cicely Saunders Institute palliative care research                                                      |
| Deverka/<br>25 /<br>USA/<br>2012                | Conceptual model for stakeholder engagement in CER | A conceptual model for involving stakeholders in the CER process                                                                                    | Literature search, followed by practical experience with an existing stakeholder engagement process/project, and review and revision by an expert panel (including patients) | Yes - patients engaged with the Center for CANCERGEN project                                                                                |
| Evans/<br>26 /<br>UK/<br>2019                   | SUCCESS model                                      | Not stated                                                                                                                                          | Initially developed through a workshop, then reviewed and refined through meetings and email discussions.                                                                    | Yes - people diagnosed with, or caring for someone with, a chronic or long-term condition                                                   |
| Evans/<br>23 /<br>UK and<br>Wales/<br>2020      | PRIME Centre Wales                                 | To enable and promote successful patient engagement across research activities within their research centre.                                        | Informed by the research literature and the development of an engagement plan with the help of patients.                                                                     | Yes – people with experience of using health services and caring for family members as well as people diagnosed with, or caring for someone |

## Characteristics of the ...

## Model/framework

| Article                                          | Characteristics of the ...                                         |                                                                                                                                                                                                                                                             |                                                                                                                          |                                                                                                                                                              |
|--------------------------------------------------|--------------------------------------------------------------------|-------------------------------------------------------------------------------------------------------------------------------------------------------------------------------------------------------------------------------------------------------------|--------------------------------------------------------------------------------------------------------------------------|--------------------------------------------------------------------------------------------------------------------------------------------------------------|
|                                                  | Model/framework                                                    |                                                                                                                                                                                                                                                             |                                                                                                                          |                                                                                                                                                              |
| First author/<br>reference/<br>country/<br>year  | Name                                                               | Purpose                                                                                                                                                                                                                                                     | Methods of<br>development                                                                                                | Were patient co-<br>researchers involved<br>in its development<br>(yes/no/not specified –<br>population)                                                     |
| Frank/<br><sup>27</sup> /<br>USA/<br>2015        | Conceptual model<br>for PCOR                                       | To provide the basis<br>for subsequent<br>evaluative<br>frameworks, to guide<br>evaluation of PCOR,<br>and to serve as a<br>foundation for<br>measurement models,<br>to allow testing of<br>hypothesized<br>relationships between<br>elements in the model. | Literature search and<br>worked with a patient<br>advisory panel                                                         | with, a chronic or long-<br>term condition<br><br>Yes - members of the<br>PCORI Patient<br>Engagement Advisory<br>Panel                                      |
| Gessell/<br><sup>29</sup> /<br>USA/<br>2017      | Not specified                                                      | To maximize<br>stakeholder<br>engagement within<br>the context of a<br>pragmatic trial                                                                                                                                                                      | "Expanded"<br>engagement<br>standards that were<br>previously proposed<br>to PCORI standards                             | Not specified                                                                                                                                                |
| Gibson/<br><sup>30</sup> /<br>UK/<br>2017        | Not specified                                                      | To map and evaluate<br>patient engagement<br>interactions in health<br>services research                                                                                                                                                                    | Adapted the<br>researchers'<br>previously developed<br>model through<br>workshops held with<br>various patient<br>groups | Yes - the language used<br>within the adapted<br>model passed through<br>iterative changes<br>involving both the<br>researchers and<br>workshop participants |
| Goeman/<br><sup>33</sup> /<br>Australia/<br>2019 | Model for<br>successful inclusion<br>of consumers and<br>community | The successful<br>inclusion of<br>consumers in research                                                                                                                                                                                                     | Co-design process<br>involving expert<br>working and<br>reference groups                                                 | Yes - People living with<br>dementia and their care-<br>partners (“consumers”)                                                                               |

## Characteristics of the ...

## Model/framework

| Article                                         |                                                                                                                                                              |                                                                                                                              |                                                                                                                                                                                                                   |                                                                                                          |
|-------------------------------------------------|--------------------------------------------------------------------------------------------------------------------------------------------------------------|------------------------------------------------------------------------------------------------------------------------------|-------------------------------------------------------------------------------------------------------------------------------------------------------------------------------------------------------------------|----------------------------------------------------------------------------------------------------------|
| First author/<br>reference/<br>country/<br>year | Name                                                                                                                                                         | Purpose                                                                                                                      | Methods of<br>development                                                                                                                                                                                         | Were patient co-<br>researchers involved<br>in its development<br>(yes/no/not specified –<br>population) |
|                                                 | representatives in research                                                                                                                                  |                                                                                                                              |                                                                                                                                                                                                                   |                                                                                                          |
| Holmes/<br>22/<br>Canada/<br>2018               | BC SUPPORT Unit Framework                                                                                                                                    | To conceptualize and organize patient engagement activities                                                                  | Not specified                                                                                                                                                                                                     | Not specified                                                                                            |
| Pearson/<br>31 /<br>UK/<br>2013                 | A provisional model for patient engagement in healthcare OR                                                                                                  | A model for patient engagement in healthcare OR                                                                              | Not specified                                                                                                                                                                                                     | Not specified                                                                                            |
| Ray/<br>34 /<br>USA/<br>2017                    | Conceptual model for understanding impact of stakeholder engagement and differentiating stakeholder-engaged research from research on stakeholder engagement | A framework for planning, evaluating, and reporting both stakeholder-engaged research and research on stakeholder engagement | Initial framework developed based on synthesis of existing literature; refined through use in a patient engagement research project which examined families' experiences of access to pediatric subspecialty care | No                                                                                                       |
| Ruco/<br>35 /<br>Canada/<br>2016                | Sunnybrook Health Sciences Centre patient engagement in PBRI framework                                                                                       | To guide and capture the range and scope of patient engagement in PBRI at Sunnybrook Health Sciences Centre, Toronto         | Developed based on CIHR's Supporting POR Visual Value Model for Patient Engagement and in alignment with Sunnybrook's PBRI Strategic plan                                                                         | Not specified                                                                                            |
| Shippee/<br>32 /                                | Framework for PSUE                                                                                                                                           | To develop a standardized, evidence-based                                                                                    | Systematic review/environmental scan/manual                                                                                                                                                                       | Yes - patient advisory group consisting of                                                               |

## Characteristics of the ...

## Model/framework

| Article                                         | Characteristics of the ...<br>Model/framework |                                                                                                       |                                                                                                                            |                                                                                                          |
|-------------------------------------------------|-----------------------------------------------|-------------------------------------------------------------------------------------------------------|----------------------------------------------------------------------------------------------------------------------------|----------------------------------------------------------------------------------------------------------|
| First author/<br>reference/<br>country/<br>year | Name                                          | Purpose                                                                                               | Methods of<br>development                                                                                                  | Were patient co-<br>researchers involved<br>in its development<br>(yes/no/not specified –<br>population) |
| USA/<br>2013                                    |                                               | framework for understanding, reporting, and assessing PSUE in biomedical and health services research | literature search that was synthesized into a two-part framework and supplemented with input from a patient advisory group | community member PSUEs                                                                                   |
| Jose/<br>Unpublished/<br>2020                   | CONNECT framework                             | To engage members of the autistic community in research                                               | Developed as part of work on the CONNECT project, including 2 feedback questionnaires designed for the study               | Yes – members of the autistic community                                                                  |

CANCERGEN = comparative effectiveness research in cancer genomics; CER = comparative effectiveness research; CIHR = Canadian Institutes of Research; OR = operations research; PBRI = practice-based research and innovation; PCORI = patient-centered outcomes research institute; POR = patient-oriented research; PSUE = patient and service user engagement; SUCCESS = service users with chronic conditions encouraging sensible solutions.

## GRIPP2-short form checklist

| Section and topic                                                                                                                                                                       | Item                                                                                                                                                                                                                                                                                                                                         | Line numbers        |
|-----------------------------------------------------------------------------------------------------------------------------------------------------------------------------------------|----------------------------------------------------------------------------------------------------------------------------------------------------------------------------------------------------------------------------------------------------------------------------------------------------------------------------------------------|---------------------|
| <b>1: Aim</b><br>Report the aim of the study                                                                                                                                            | Our primary objective was to count and describe the elements that overlap (i.e., present in 2 or more models or frameworks) and diverge between identified models and frameworks.                                                                                                                                                            | 120-122             |
| <b>2: Methods</b><br>Provide a clear description of the methods used for patient and public involvement (PPI) in the study                                                              | We engaged two patient co-researchers (R.S. and S.H.), at the level of involve (24), in the design and conduct of this study... The primary methods of engagement were 1-on-1 and small group meetings, as guided by a terms of reference co-developed at the outset of the research partnership.                                            | 207-208,<br>213-214 |
| <b>3: Results</b><br>Outcomes—Report the results of PPI in the study, including both positive and negative outcomes                                                                     | They were involved in development and publication of the scoping review protocol (19), provided feedback on the analyses (including element groupings), provided their perspectives on the interpretation of the study findings, and co-authored this manuscript.                                                                            | 208-210             |
| <b>4: Discussion</b><br>Outcomes—Comment on the extent to which PPI influenced the study overall. Describe positive and negative effects                                                | In helping shape these stages of the research cycle and related outputs, a notable impact of engagement also included identifying gaps in the current literature relevant to patient partners.                                                                                                                                               | 210-212             |
| <b>5: Reflections</b><br>Critical perspective—Comment critically on the study, reflecting on the things that went well and those that did not, so others can learn from this experience | Further, the engagement of patient co-researchers in our scoping review at the level of involve limited their opportunities to formally provide insights and expertise to pre-determined study milestones. Engagement at the level of collaborate or empower may have resulted in other insights through more direct contact with the study. | 388-392             |

Adapted from: *BMJ* 2017;358:j3453

## Preferred Reporting Items for Systematic reviews and Meta-Analyses extension for Scoping Reviews (PRISMA-ScR) Checklist

| SECTION                                               | ITEM | PRISMA-ScR CHECKLIST ITEM                                                                                                                                                                                                                                                                                  | REPORTED ON PAGE # |
|-------------------------------------------------------|------|------------------------------------------------------------------------------------------------------------------------------------------------------------------------------------------------------------------------------------------------------------------------------------------------------------|--------------------|
| <b>TITLE</b>                                          |      |                                                                                                                                                                                                                                                                                                            |                    |
| Title                                                 | 1    | Identify the report as a scoping review.                                                                                                                                                                                                                                                                   | 1                  |
| <b>ABSTRACT</b>                                       |      |                                                                                                                                                                                                                                                                                                            |                    |
| Structured summary                                    | 2    | Provide a structured summary that includes (as applicable): background, objectives, eligibility criteria, sources of evidence, charting methods, results, and conclusions that relate to the review questions and objectives.                                                                              | 2                  |
| <b>INTRODUCTION</b>                                   |      |                                                                                                                                                                                                                                                                                                            |                    |
| Rationale                                             | 3    | Describe the rationale for the review in the context of what is already known. Explain why the review questions/objectives lend themselves to a scoping review approach.                                                                                                                                   | 4-7                |
| Objectives                                            | 4    | Provide an explicit statement of the questions and objectives being addressed with reference to their key elements (e.g., population or participants, concepts, and context) or other relevant key elements used to conceptualize the review questions and/or objectives.                                  | 7                  |
| <b>METHODS</b>                                        |      |                                                                                                                                                                                                                                                                                                            |                    |
| Protocol and registration                             | 5    | Indicate whether a review protocol exists; state if and where it can be accessed (e.g., a Web address); and if available, provide registration information, including the registration number.                                                                                                             | 7-8                |
| Eligibility criteria                                  | 6    | Specify characteristics of the sources of evidence used as eligibility criteria (e.g., years considered, language, and publication status), and provide a rationale.                                                                                                                                       | 8                  |
| Information sources*                                  | 7    | Describe all information sources in the search (e.g., databases with dates of coverage and contact with authors to identify additional sources), as well as the date the most recent search was executed.                                                                                                  | 9                  |
| Search                                                | 8    | Present the full electronic search strategy for at least 1 database, including any limits used, such that it could be repeated.                                                                                                                                                                            | Appendix 1         |
| Selection of sources of evidence†                     | 9    | State the process for selecting sources of evidence (i.e., screening and eligibility) included in the scoping review.                                                                                                                                                                                      | 9                  |
| Data charting process‡                                | 10   | Describe the methods of charting data from the included sources of evidence (e.g., calibrated forms or forms that have been tested by the team before their use, and whether data charting was done independently or in duplicate) and any processes for obtaining and confirming data from investigators. | 9-10               |
| Data items                                            | 11   | List and define all variables for which data were sought and any assumptions and simplifications made.                                                                                                                                                                                                     | Appendix 2         |
| Critical appraisal of individual sources of evidence§ | 12   | If done, provide a rationale for conducting a critical appraisal of included sources of evidence; describe the methods used and how this information was used in any data synthesis (if appropriate).                                                                                                      | N/A                |



| SECTION                                       | ITEM | PRISMA-ScR CHECKLIST ITEM                                                                                                                                                                       | REPORTED ON PAGE # |
|-----------------------------------------------|------|-------------------------------------------------------------------------------------------------------------------------------------------------------------------------------------------------|--------------------|
| Synthesis of results                          | 13   | Describe the methods of handling and summarizing the data that were charted.                                                                                                                    | 10                 |
| <b>RESULTS</b>                                |      |                                                                                                                                                                                                 |                    |
| Selection of sources of evidence              | 14   | Give numbers of sources of evidence screened, assessed for eligibility, and included in the review, with reasons for exclusions at each stage, ideally using a flow diagram.                    | 12, Appendix 3     |
| Characteristics of sources of evidence        | 15   | For each source of evidence, present characteristics for which data were charted and provide the citations.                                                                                     | 12-13, Appendix 4  |
| Critical appraisal within sources of evidence | 16   | If done, present data on critical appraisal of included sources of evidence (see item 12).                                                                                                      | N/A                |
| Results of individual sources of evidence     | 17   | For each included source of evidence, present the relevant data that were charted that relate to the review questions and objectives.                                                           | 13-18              |
| Synthesis of results                          | 18   | Summarize and/or present the charting results as they relate to the review questions and objectives.                                                                                            | 13-14              |
| <b>DISCUSSION</b>                             |      |                                                                                                                                                                                                 |                    |
| Summary of evidence                           | 19   | Summarize the main results (including an overview of concepts, themes, and types of evidence available), link to the review questions and objectives, and consider the relevance to key groups. | 18-21              |
| Limitations                                   | 20   | Discuss the limitations of the scoping review process.                                                                                                                                          | 19                 |
| Conclusions                                   | 21   | Provide a general interpretation of the results with respect to the review questions and objectives, as well as potential implications and/or next steps.                                       | 21-22              |
| <b>FUNDING</b>                                |      |                                                                                                                                                                                                 |                    |
| Funding                                       | 22   | Describe sources of funding for the included sources of evidence, as well as sources of funding for the scoping review. Describe the role of the funders of the scoping review.                 | 22-23              |

JBI = Joanna Briggs Institute; PRISMA-ScR = Preferred Reporting Items for Systematic reviews and Meta-Analyses extension for Scoping Reviews.

\* Where *sources of evidence* (see second footnote) are compiled from, such as bibliographic databases, social media platforms, and Web sites.

† A more inclusive/heterogeneous term used to account for the different types of evidence or data sources (e.g., quantitative and/or qualitative research, expert opinion, and policy documents) that may be eligible in a scoping review as opposed to only studies. This is not to be confused with *information sources* (see first footnote).

‡ The frameworks by Arksey and O'Malley (6) and Levac and colleagues (7) and the JBI guidance (4, 5) refer to the process of data extraction in a scoping review as data charting.

§ The process of systematically examining research evidence to assess its validity, results, and relevance before using it to inform a decision. This term is used for items 12 and 19 instead of "risk of bias" (which is more applicable to systematic reviews of interventions) to include and acknowledge the various sources of evidence that may be used in a scoping review (e.g., quantitative and/or qualitative research, expert opinion, and policy document).

From: Tricco AC, Lillie E, Zarin W, O'Brien KK, Colquhoun H, Levac D, et al. PRISMA Extension for Scoping Reviews (PRISMA-ScR): Checklist and Explanation. *Ann Intern Med.* 2018;169:467–473. doi: 10.7326/M18-0850.



St. Michael's

Inspired Care.  
Inspiring Science.

For peer review only - <http://bmjopen.bmj.com/site/about/guidelines.xhtml>
