# Supplementary material for: Scoping review of models and frameworks of patient engagement in health services research
Source: PubMed Central journal article supplement — BMJ Open. 2022 Aug 19;12(8):e063507. doi: 10.1136/bmjopen-2022-063507 (PMC9396146; doi:10.1136/bmjopen-2022-063507), 2022-08-19
Supplement: bmjopen-2022-063507supp001.pdf [file bmjopen-2022-063507supp001.pdf]

## Appendix 1 –Search strategies for all databases, registers, and websites

### CINAHL

1. (patient\* n3 engag\*) OR “patient oriented research”
2. model OR models OR framework\* OR (MH “Conceptual Framework”) OR (MH “Models, Theoretical”)
3. research
4. “patient and public involvement” OR “patient involvement” or “stakeholder engagement”
5. S1 OR S4
6. S2 AND S3 AND S5

### Cochrane Database of Systematic Reviews

“patient engagement” OR “patient oriented research” OR “patient and public involvement” OR “patient involvement” OR “stakeholder engagement” in Title Abstract Keyword

### Joanna Briggs Institute Evidence Based Practice Database

(“patient engagement” OR “patient oriented research” OR “patient and public involvement” OR “patient involvement” OR “stakeholder engagement”).mp.

### MEDLINE (Ovid)

1. Patient Participation/
2. models, theoretical/ or patient-specific modeling/
3. (patient\* adj3 engag\*).mp.
4. (model or models or framework\*).mp.
5. research.mp.
6. ("patient oriented research" or "patient and public involvement" or "patient involvement" or "stakeholder engagement").mp.
7. 1 or 3 or 6
8. 2 or 4
9. 5 and 7 and 8

### Scopus

((TITLE-ABS-KEY (patient\* W/3 engag\*)) OR (TITLE-ABS-KEY (“patient oriented research”)) OR (TITLE-ABS-KEY (“patient and public involvement”)) OR (TITLE-ABS-KEY (“patient involvement”)) OR (TITLE-ABS-KEY (“stakeholder engagement”))) AND (TITLE-ABS-KEY (model or models or framework\*)) AND (TITLE-ABS-KEY (research))

## PsycINFO

1. Client Participation/
2. Models/
3. (patient\* adj3 engag\*).mp.
4. (model OR models OR framework\*).mp.
5. research.mp.
6. (“patient oriented research” OR “patient and public involvement” OR “patient involvement” or “stakeholder engagement”).mp.
7. 1 OR 3 OR 6
8. 2 OR 4
9. 5 AND 7 AND 8

## Web of Science - Conference Proceedings Citation Index

(TS=(patient\* NEAR/3 engag\* ) OR (TS=( "patient oriented research" OR "patient and public involvement" OR "patient involvement" OR "stakeholder engagement" ) ) ) AND ( TS=(model OR models OR framework\* ) ) AND ( TS=( research ) )

## Google Scholar

("patient engagement" OR "patient oriented research" OR “patient and public involvement” OR “patient involvement” OR “stakeholder engagement”) AND (model or framework) AND research

## Conference Proceedings Citation Index

(TS=(patient\* NEAR/3 engag\* ) OR (TS=( "patient oriented research" OR "patient and public involvement" OR "patient involvement" OR "stakeholder engagement" ) ) ) AND ( TS=(model OR models OR framework\* ) ) AND ( TS=( research ) )

## ProQuest Dissertations & Theses

noft((patient\* near/3 engag\* ) OR "patient oriented research" OR "patient and public involvement" OR "patient involvement" OR "stakeholder engagement") AND noft(model OR models OR framework\*) AND noft(research)

## Google and websites

(model OR framework) AND “health services research”
