# Supplementary material for: Scoping review of models and frameworks of patient engagement in health services research
Source: PubMed Central journal article supplement — BMJ Open. 2022 Aug 19;12(8):e063507. doi: 10.1136/bmjopen-2022-063507 (PMC9396146; doi:10.1136/bmjopen-2022-063507), 2022-08-19
Supplement: bmjopen-2022-063507supp002.pdf [file bmjopen-2022-063507supp002.pdf]

## Appendix 2 – Standardized data extraction form

### Notes on using a data extraction form:

- Be consistent in the order and style you use to describe the information for each report.
- Record any missing information as unclear or not described, to make it clear that the information was not found in the study report(s), not that you forgot to extract it.
- Include any instructions and decision rules on the data collection form, or in an accompanying document. It is important to practice using the form and give training to any other authors using the form.

### Decision rules

- Only include models and framework that are explicitly labelled by study authors as such

### General Information

|                                              |  |
|----------------------------------------------|--|
| Date form completed<br>( <i>dd/mm/yyyy</i> ) |  |
| Name of data extractor                       |  |
|                                              |  |

### Study authors (characteristics of)

|                                                                  | <b>Descriptions as stated in report/paper or note otherwise</b> | <b>Location in text or source (<i>pg &amp; ¶/fig/table/other</i>)</b> |
|------------------------------------------------------------------|-----------------------------------------------------------------|-----------------------------------------------------------------------|
| <b>Author last names</b>                                         |                                                                 |                                                                       |
| <b>Country</b> ( <i>of authors' institutional affiliations</i> ) |                                                                 |                                                                       |

|                                                                                  |  |  |
|----------------------------------------------------------------------------------|--|--|
| <b>Lens of authors</b><br><i>(by individuals, cluster/ groups or body parts)</i> |  |  |
| <b>Notes:</b>                                                                    |  |  |

## Publication (characteristics of)

|                            | <b>Descriptions as stated in report/paper or note otherwise</b> | <b>Location in text or source (pg &amp; ¶/fig/table/other )</b> |
|----------------------------|-----------------------------------------------------------------|-----------------------------------------------------------------|
| <b>Study name</b>          |                                                                 |                                                                 |
| <b>Publication year</b>    |                                                                 |                                                                 |
| <b>Journal</b>             |                                                                 |                                                                 |
| <b>Is study published?</b> | <b>Yes</b> <b>No</b>                                            |                                                                 |
| <b>Notes:</b>              |                                                                 |                                                                 |

## Model/framework (characteristics of)

|                                       | <b>Descriptions as stated in report/paper or note otherwise</b> | <b>Location in text or source (pg &amp; ¶/fig/table/other )</b> |
|---------------------------------------|-----------------------------------------------------------------|-----------------------------------------------------------------|
| <b>Name of model/framework</b>        |                                                                 |                                                                 |
| <b>Purpose/aim of model/framework</b> |                                                                 |                                                                 |

|                                                              | <b>Descriptions as stated in report/paper or note otherwise</b> | <b>Location in text or source (pg &amp; ¶/fig/table/other)</b> |
|--------------------------------------------------------------|-----------------------------------------------------------------|----------------------------------------------------------------|
| <b>Population developed in/for</b>                           |                                                                 |                                                                |
| <b>Methods used to develop m/f?</b>                          |                                                                 |                                                                |
| <b>Patients involved in m/f development (and if so how)?</b> |                                                                 |                                                                |
| <b>Targeted stage of research process</b>                    |                                                                 |                                                                |
| <b>Elements (description)</b>                                |                                                                 |                                                                |
| <b>Proposed relations between elements</b>                   |                                                                 |                                                                |
| <b>Location on spectrum of engagement</b>                    |                                                                 |                                                                |
| <b>Strs/weaknesses of model/framework (stated in study)</b>  |                                                                 |                                                                |
| <b>Notes:</b>                                                |                                                                 |                                                                |

Model/framework (figure presented in text)

## Definitions

|                          |                                                                                                                                                                                                                                                                                                                                                                                                                                                   |
|--------------------------|---------------------------------------------------------------------------------------------------------------------------------------------------------------------------------------------------------------------------------------------------------------------------------------------------------------------------------------------------------------------------------------------------------------------------------------------------|
| Model                    | A descriptive and deliberate simplification of a phenomenon or an aspect of a phenomenon                                                                                                                                                                                                                                                                                                                                                          |
| Framework                | A shared orientation for studying, explaining, and understanding phenomena of interest through the description and identification of the universal elements underlying a phenomenon of interest                                                                                                                                                                                                                                                   |
| Patient engagement       | Meaningful and active collaboration of patients in research governance, priority setting, conduct, and knowledge translation                                                                                                                                                                                                                                                                                                                      |
| Health services research | The study of how social factors, financing systems, organizational structures and processes, health technologies, and personal behaviours affect access to health care, the quality and cost of health care, and, ultimately, the population's health and well-being. It includes research with the goal of improving the efficiency and effectiveness of health professionals and the health care system, through changes to practice and policy |

## Inclusion/exclusion criteria

| Inclusion                                      | Exclusion                                                                                                                                                                                                                                                                                                                                                                                   |
|------------------------------------------------|---------------------------------------------------------------------------------------------------------------------------------------------------------------------------------------------------------------------------------------------------------------------------------------------------------------------------------------------------------------------------------------------|
| Published or unpublished model or framework of | Models/frameworks not focused on health services research, such as those related to: <ul style="list-style-type: none"> <li>• clinical decision-making/practice,</li> <li>• active role of patients in health management,</li> <li>• therapeutic engagement,</li> <li>• understanding disease experience</li> <li>• technology engagement</li> <li>• the pharmaceutical industry</li> </ul> |
| Patient engagement in                          | Not written in English                                                                                                                                                                                                                                                                                                                                                                      |
| Health services research                       | Unavailable as full-text                                                                                                                                                                                                                                                                                                                                                                    |
