# Supplementary material for: Scoping review of models and frameworks of patient engagement in health services research
Source: PubMed Central journal article supplement — BMJ Open. 2022 Aug 19;12(8):e063507. doi: 10.1136/bmjopen-2022-063507 (PMC9396146; doi:10.1136/bmjopen-2022-063507), 2022-08-19
Supplement: bmjopen-2022-063507supp004.pdf [file bmjopen-2022-063507supp004.pdf]

## Appendix 4. Select characteristics of included articles and/or models and frameworks

| Article                                               | Characteristics of the ...                         |                                                                                                                                                     |                                                                                                                                                                              |                                                                                                                                             |
|-------------------------------------------------------|----------------------------------------------------|-----------------------------------------------------------------------------------------------------------------------------------------------------|------------------------------------------------------------------------------------------------------------------------------------------------------------------------------|---------------------------------------------------------------------------------------------------------------------------------------------|
|                                                       | Model/framework                                    |                                                                                                                                                     |                                                                                                                                                                              |                                                                                                                                             |
| First author/<br>reference/<br>country/<br>year       | Name                                               | Purpose                                                                                                                                             | Methods of<br>development                                                                                                                                                    | Were patient co-<br>researchers involved<br>in its development<br>(yes/no/not specified –<br>population)                                    |
| Daveson/<br><sup>28</sup> /<br>UK/<br>2015            | Not specified                                      | An optimal involvement model that fulfills the needs of both users and researchers while acknowledging any potential diversity between these groups | Consultation workshop attended by patients and caregivers                                                                                                                    | Yes – patients actively involved in Cicely Saunders Institute palliative care research                                                      |
| Deverka/<br><sup>25</sup> /<br>USA/<br>2012           | Conceptual model for stakeholder engagement in CER | A conceptual model for involving stakeholders in the CER process                                                                                    | Literature search, followed by practical experience with an existing stakeholder engagement process/project, and review and revision by an expert panel (including patients) | Yes - patients engaged with the Center for CANCERGEN project                                                                                |
| Evans/<br><sup>26</sup> /<br>UK/<br>2019              | SUCCESS model                                      | Not stated                                                                                                                                          | Initially developed through a workshop, then reviewed and refined through meetings and email discussions.                                                                    | Yes - people diagnosed with, or caring for someone with, a chronic or long-term condition                                                   |
| Evans/<br><sup>23</sup> /<br>UK and<br>Wales/<br>2020 | PRIME Centre<br>Wales                              | To enable and promote successful patient engagement across research activities within their research centre.                                        | Informed by the research literature and the development of an engagement plan with the help of patients.                                                                     | Yes – people with experience of using health services and caring for family members as well as people diagnosed with, or caring for someone |

| Article                                          | Characteristics of the ...                                |                                                                                                                                                                                                                            |                                                                                                        |                                                                                                                                            |
|--------------------------------------------------|-----------------------------------------------------------|----------------------------------------------------------------------------------------------------------------------------------------------------------------------------------------------------------------------------|--------------------------------------------------------------------------------------------------------|--------------------------------------------------------------------------------------------------------------------------------------------|
|                                                  | Model/framework                                           |                                                                                                                                                                                                                            |                                                                                                        |                                                                                                                                            |
| First author/<br>reference/<br>country/<br>year  | Name                                                      | Purpose                                                                                                                                                                                                                    | Methods of<br>development                                                                              | Were patient co-<br>researchers involved<br>in its development<br>(yes/no/not specified –<br>population)                                   |
|                                                  |                                                           |                                                                                                                                                                                                                            |                                                                                                        | with, a chronic or long-term condition                                                                                                     |
| Frank/<br><sup>27</sup> /<br>USA/<br>2015        | Conceptual model for PCOR                                 | To provide the basis for subsequent evaluative frameworks, to guide evaluation of PCOR, and to serve as a foundation for measurement models, to allow testing of hypothesized relationships between elements in the model. | Literature search and worked with a patient advisory panel                                             | Yes - members of the PCORI Patient Engagement Advisory Panel                                                                               |
| Gessell/<br><sup>29</sup> /<br>USA/<br>2017      | Not specified                                             | To maximize stakeholder engagement within the context of a pragmatic trial                                                                                                                                                 | "Expanded" engagement standards that were previously proposed to PCORI standards                       | Not specified                                                                                                                              |
| Gibson/<br><sup>30</sup> /<br>UK/<br>2017        | Not specified                                             | To map and evaluate patient engagement interactions in health services research                                                                                                                                            | Adapted the researchers' previously developed model through workshops held with various patient groups | Yes - the language used within the adapted model passed through iterative changes involving both the researchers and workshop participants |
| Goeman/<br><sup>33</sup> /<br>Australia/<br>2019 | Model for successful inclusion of consumers and community | The successful inclusion of consumers in research                                                                                                                                                                          | Co-design process involving expert working and reference groups                                        | Yes - People living with dementia and their care-partners ("consumers")                                                                    |

| Article                                         | Characteristics of the ...                                                                                                                                   |                                                                                                                              |                                                                                                                                                                                                                   |                                                                                                          |
|-------------------------------------------------|--------------------------------------------------------------------------------------------------------------------------------------------------------------|------------------------------------------------------------------------------------------------------------------------------|-------------------------------------------------------------------------------------------------------------------------------------------------------------------------------------------------------------------|----------------------------------------------------------------------------------------------------------|
|                                                 | Model/framework                                                                                                                                              |                                                                                                                              |                                                                                                                                                                                                                   |                                                                                                          |
| First author/<br>reference/<br>country/<br>year | Name                                                                                                                                                         | Purpose                                                                                                                      | Methods of<br>development                                                                                                                                                                                         | Were patient co-<br>researchers involved<br>in its development<br>(yes/no/not specified –<br>population) |
|                                                 | representatives in research                                                                                                                                  |                                                                                                                              |                                                                                                                                                                                                                   |                                                                                                          |
| Holmes/<br><sup>22</sup> /<br>Canada/<br>2018   | BC SUPPORT Unit Framework                                                                                                                                    | To conceptualize and organize patient engagement activities                                                                  | Not specified                                                                                                                                                                                                     | Not specified                                                                                            |
| Pearson/<br><sup>31</sup> /<br>UK/<br>2013      | A provisional model for patient engagement in healthcare OR                                                                                                  | A model for patient engagement in healthcare OR                                                                              | Not specified                                                                                                                                                                                                     | Not specified                                                                                            |
| Ray/<br><sup>34</sup> /<br>USA/<br>2017         | Conceptual model for understanding impact of stakeholder engagement and differentiating stakeholder-engaged research from research on stakeholder engagement | A framework for planning, evaluating, and reporting both stakeholder-engaged research and research on stakeholder engagement | Initial framework developed based on synthesis of existing literature; refined through use in a patient engagement research project which examined families' experiences of access to pediatric subspecialty care | No                                                                                                       |
| Ruco/<br><sup>35</sup> /<br>Canada/<br>2016     | Sunnybrook Health Sciences Centre patient engagement in PBRI framework                                                                                       | To guide and capture the range and scope of patient engagement in PBRI at Sunnybrook Health Sciences Centre, Toronto         | Developed based on CIHR's Supporting POR Visual Value Model for Patient Engagement and in alignment with Sunnybrook's PBRI Strategic plan                                                                         | Not specified                                                                                            |
| Shippee/<br><sup>32</sup> /                     | Framework for PSUE                                                                                                                                           | To develop a standardized, evidence-based                                                                                    | Systematic review/environmental scan/manual                                                                                                                                                                       | Yes - patient advisory group consisting of                                                               |

| Article                                         | Characteristics of the ... |                                                                                                       |                                                                                                                            |                                                                                                          |
|-------------------------------------------------|----------------------------|-------------------------------------------------------------------------------------------------------|----------------------------------------------------------------------------------------------------------------------------|----------------------------------------------------------------------------------------------------------|
|                                                 | Model/framework            |                                                                                                       |                                                                                                                            |                                                                                                          |
| First author/<br>reference/<br>country/<br>year | Name                       | Purpose                                                                                               | Methods of<br>development                                                                                                  | Were patient co-<br>researchers involved<br>in its development<br>(yes/no/not specified –<br>population) |
| USA/<br>2013                                    |                            | framework for understanding, reporting, and assessing PSUE in biomedical and health services research | literature search that was synthesized into a two-part framework and supplemented with input from a patient advisory group | community member PSUEs                                                                                   |
| Jose/<br>Unpublished/<br>2020                   | CONNECT<br>framework       | To engage members of the autistic community in research                                               | Developed as part of work on the CONNECT project, including 2 feedback questionnaires designed for the study               | Yes – members of the autistic community                                                                  |

CANCERGEN = comparative effectiveness research in cancer genomics; CER = comparative effectiveness research; CIHR = Canadian Institutes of Research; OR = operations research; PBRI = practice-based research and innovation; PCORI = patient-centered outcomes research institute; POR = patient-oriented research; PSUE = patient and service user engagement; SUCCESS = service users with chronic conditions encouraging sensible solutions.
