# Supplementary figures and images for: Scoping review of models and frameworks of patient engagement in health services research
Source: PubMed Central journal article supplement — BMJ Open. 2022 Aug 19;12(8):e063507. doi: 10.1136/bmjopen-2022-063507 (PMC9396146; doi:10.1136/bmjopen-2022-063507), 2022-08-19

## Appendix 3 – PRISMA diagram

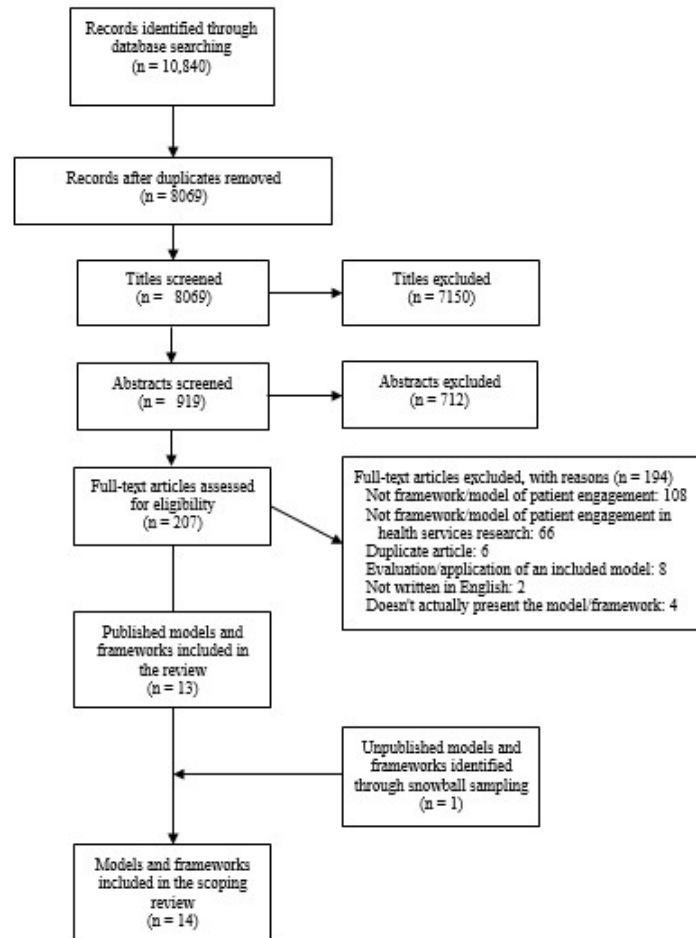

Supplement: bmjopen-2022-063507supp003.pdf [file bmjopen-2022-063507supp003.pdf]
